# Supplementary material for: Regulation of endogenous retrovirus–derived regulatory elements by GATA2/3 and MSX2 in human trophoblast stem cells
Source: HighWire-hosted journal article supplement (doi:10.1101/gr.277150.122), 2023-02-01
Supplement: Supplemental_Table_S1.xlsx [file Supplemental_Table_S1.xlsx]

## Sheet: Sheet1
Table S1 Sources of data used in this study
Data type	Factor	Accession (GEO/ENCODE/NBDC)	Organism	Tissue/Cell	Replicates	Reference
RNA-seq	-	GSE209536	Human	TSC, Untreated	2	This study
	-	GSE209536	Human	TSC, IFNγ-treated	2	This study
		hum0086.v3	Human	TSC	2	Okae et al., 2018
		hum0086.v3	Human	STB	2	Okae et al., 2018
		hum0086.v3	Human	EVT	2	Okae et al., 2018
	-	GSE118285	Human	Placenta	2	Dunn-Fletcher et al., 2018
	-	GSE43520	Human	Placenta	2	Necsulea et al., 2014
	-	GSE30352	Human	Brain	4	Brawand et al., 2011
	-	GSE30352	Human	Heart	2	Brawand et al., 2011
	-	GSE30352	Human	Kidney	2	Brawand et al., 2011
	-	GSE30352	Human	Liver	2	Brawand et al., 2011
	-	GSE30352	Human	Testis	2	Brawand et al., 2011
	-	GSE30611	Human	Adipose	2	BodyMap 2.0
	-	GSE30611	Human	Adrenal	2	BodyMap 2.0
	-	GSE30611	Human	Breast	2	BodyMap 2.0
	-	GSE30611	Human	Colon	2	BodyMap 2.0
	-	GSE30611	Human	Leukocyte	2	BodyMap 2.0
	-	GSE30611	Human	Lung	2	BodyMap 2.0
	-	GSE30611	Human	Lymphnode	2	BodyMap 2.0
	-	GSE30611	Human	Ovary	2	BodyMap 2.0
	-	GSE30611	Human	Prostate	2	BodyMap 2.0
	-	GSE30611	Human	Skeletal muscle	2	BodyMap 2.0
	-	GSE30611	Human	Thyroid	2	BodyMap 2.0
	-	GSE30611	Human	Brain	2	BodyMap 2.0
	-	GSE30611	Human	Heart	2	BodyMap 2.0
	-	GSE30611	Human	Kidney	2	BodyMap 2.0
	-	GSE30611	Human	Liver	2	BodyMap 2.0
	-	GSE30611	Human	Testis	2	BodyMap 2.0
	-	GSE165970	Human	TSC	3	Hornbachner et al., 2021
	-	GSE165970	Human	TSC (MSX2KD)	4	Hornbachner et al., 2021
	-	GSE165970	Human	TSC (MSX2OE)	2	Hornbachner et al., 2021
ChIP-seq	H3K27ac	GSE209541	Human	TSC, Untreated	2	This study
	H3K27ac	GSE209541	Human	TSC, IFNγ-treated	2	This study
	Input	GSE209541	Human	TSC, Untreated	1	This study
	Input	GSE209541	Human	TSC, IFNγ-treated	1	This study
	H3K27ac	hum0086.v3	Human	TSC	2	Okae et al., 2018
	H3K27ac	hum0086.v3	Human	STB	2	Okae et al., 2018
	H3K27ac	hum0086.v3	Human	EVT	2	Okae et al., 2018
	H3K4me3	hum0086.v3	Human	TSC	2	Okae et al., 2018
	H3K4me3	hum0086.v3	Human	STB	2	Okae et al., 2018
	H3K4me3	hum0086.v3	Human	EVT	2	Okae et al., 2018
	H3K9me3	hum0086.v3	Human	TSC	2	Okae et al., 2018
	H3K9me3	hum0086.v3	Human	STB	2	Okae et al., 2018
	H3K9me3	hum0086.v3	Human	EVT	2	Okae et al., 2018
	Input	hum0086.v3	Human	TSC	1	Okae et al., 2018
	H3K27ac	GSE156987	Human	Placenta	1	Sun et al., 2021
	H3K4me3	GSE156987	Human	Placenta	1	Sun et al., 2021
	Input	GSE156987	Human	Placenta	1	Sun et al., 2021
	GATA2	GSE105258	Human	TSC	2	Krendl et al., 2017
	GATA3	GSE105258	Human	TSC	2	Krendl et al., 2017
	TFAP2A	GSE105258	Human	TSC	2	Krendl et al., 2017
	TFAP2C	GSE105258	Human	TSC	2	Krendl et al., 2017
	Input	GSE105258	Human	TSC	3	Krendl et al., 2017
	MSX2	GSE165970	Human	TSC	3	Hornbachner et al., 2021
	ARID1A	GSE165970	Human	TSC	2	Hornbachner et al., 2021
	SMARCA4	GSE165970	Human	TSC	2	Hornbachner et al., 2021
	H3K27ac	GSE165970	Human	TSC	2	Hornbachner et al., 2021
	H3K27ac	GSE165970	Human	TSC (MSX2KD)	2	Hornbachner et al., 2021
	Input	GSE165970	Human	TSC	2	Hornbachner et al., 2021
	Input	GSE165970	Human	TSC (MSX2KD)	2	Hornbachner et al., 2021
	STAT1	GSE31477	Human	HeLa	1	Snyder et al., 2012
	Input	GSE31477	Human	HeLa	1	Snyder et al., 2012
	STAT1	GSE31477	Human	K562	1	Snyder et al., 2012
	IRF1	GSE31477	Human	K562	1	Snyder et al., 2012
	Input	GSE31477	Human	K562	1	Snyder et al., 2012
	STAT1	GSE43036	Human	CD14+	1	Qiao et al., 2013
	STAT1	GSE43036	Human	CD14+	2	Qiao et al., 2013
	Input	GSE43036	Human	CD14+	1	Qiao et al., 2013
ChIP-seq peak files from ENCODE project	H3K27ac	GSE18927	Human	Adrenal	2	Bernstein et al., 2010
	H3K27ac	GSE18927	Human	Aorta	2	Bernstein et al., 2010
	H3K27ac	GSE18927	Human	Chorion	1	Bernstein et al., 2010
	H3K27ac	GSE18927	Human	Kidney	1	Bernstein et al., 2010
	H3K27ac	GSE18927	Human	Liver	1	Bernstein et al., 2010
	H3K27ac	GSE18927	Human	Lung	1	Bernstein et al., 2010
	H3K27ac	GSE18927	Human	Ovary	1	Bernstein et al., 2010
	H3K27ac	GSE18927	Human	Pancreas	1	Bernstein et al., 2010
	H3K27ac	GSE18927	Human	Placenta	2	Bernstein et al., 2010
	H3K27ac	GSE18927	Human	SpinalCord	1	Bernstein et al., 2010
	H3K27ac	GSE18927	Human	Spleen	2	Bernstein et al., 2010
	H3K27ac	GSE18927	Human	Stomach	1	Bernstein et al., 2010
	H3K27ac	GSE18927	Human	Thymus	1	Bernstein et al., 2010
	H3K27ac	GSE18927	Human	Thyroid	1	Bernstein et al., 2010
	H3K27ac	GSE18927	Human	Uterus	2	Bernstein et al., 2010
	H3K4me3	GSE18927	Human	Adrenal	1	Bernstein et al., 2010
	H3K4me3	GSE18927	Human	Aorta	1	Bernstein et al., 2010
	H3K4me3	GSE18927	Human	Chorion	1	Bernstein et al., 2010
	H3K4me3	GSE18927	Human	Kidney	1	Bernstein et al., 2010
	H3K4me3	GSE18927	Human	Liver	1	Bernstein et al., 2010
	H3K4me3	GSE18927	Human	Lung	1	Bernstein et al., 2010
	H3K4me3	GSE18927	Human	Ovary	2	Bernstein et al., 2010
	H3K4me3	GSE18927	Human	Placenta	2	Bernstein et al., 2010
	H3K4me3	GSE18927	Human	Pancreas	1	Bernstein et al., 2010
	H3K4me3	GSE18927	Human	SpinalCord	1	Bernstein et al., 2010
	H3K4me3	GSE18927	Human	Spleen	2	Bernstein et al., 2010
	H3K4me3	GSE18927	Human	Stomach	1	Bernstein et al., 2010
	H3K4me3	GSE18927	Human	Thymus	1	Bernstein et al., 2010
	H3K4me3	GSE18927	Human	Thyroid	1	Bernstein et al., 2010
	H3K4me3	GSE18927	Human	Uterus	2	Bernstein et al., 2010
Promoter Capture-HiC	-	GSE86189	Human	Trophoblast-like cell	-	Jung et al., 2019
Reference
Bernstein B.E., et al. (2010) The NIH Roadmap Epigenomics Mapping Consortium. Nature 28(10):1045-1048.
BodyMap2.0. 2011. [E-MTAB-513] Illumina Human Body Map 2.0 Project. https://www.ebi.ac.uk/arrayexpress/experiments/E-MTAB-513.
Brawand D., et al. (2010). The evolution of gene expression levels in mammalian organs. 2010. Nature, 478(7369):343-348.
Dunn-Fletcher, C. E., et al. (2018). Anthropoid primate-specific retroviral element THE1B controls expression of CRH in placenta and alters gestation length. PLoS Biol 16(9): e2006337.
Hornbachner, R., et al. (2021). "MSX2 safeguards syncytiotrophoblast fate of human trophoblast stem cells." Proc Natl Acad Sci U S A 118(37).
Jung, I., et al. (2019). "A compendium of promoter-centered long-range chromatin interactions in the human genome." Nat Genet 51(10): 1442-1449.
Krendl, C., et al. (2017). "GATA2/3-TFAP2A/C transcription factor network couples human pluripotent stem cell differentiation to trophectoderm with repression of pluripotency." Proc Natl Acad Sci U S A 114(45): E9579-E9588.
Necsulea A., et al. (2014). The evolution of lncRNA repertoires and expression patterns in tetrapods. Nature, 505(7485):635-640.
Okae, H., et al. (2018). "Derivation of Human Trophoblast Stem Cells." Cell Stem Cell 22(1): 50-63 e56.
Qiao Y, et al. (2013). "Synergistic activation of inflammatory cytokine genes by interferon-γ-induced chromatin remodeling and toll-like receptor signaling." Immunity 39(3): 454-69.
Snyder M., et al. (2012). "An integrated encyclopedia of DNA elements in the human genome." Nature 489(7414):57-74.
Sun, M. A., et al. (2021). "Endogenous retroviruses drive lineage-specific regulatory evolution across primate and rodent placentae." Mol Biol Evol 38(11): 4992-5004.
