# Supplementary material for: Regulation of endogenous retrovirus–derived regulatory elements by GATA2/3 and MSX2 in human trophoblast stem cells
Source: HighWire-hosted journal article supplement (doi:10.1101/gr.277150.122), 2023-02-01
Supplement: Supplemental_Table_S2.xlsx [file Supplemental_Table_S2.xlsx]

## Sheet: Table S2
Chrom	Start	End	Cell-type-specific activity based on H3K27ac mark			MER41 subfamily
			TSC	STB	EVT
1	8115235	8129265	1	1	1	MER41A
1	8895450	8900100	1	1	1	MER41B
1	8900215	8900960	1	1	0	MER41B
1	8912838	8913348	1	0	0	MER41A
1	9083584	9085751	1	1	0	MER41E
1	17473155	17477976	1	1	1	MER41A
1	18414161	18417347	1	1	1	MER41B
1	18419542	18422191	1	0	0	MER41B
1	21401029	21402739	1	1	0	MER41B
1	21785191	21785489	1	1	1	MER41B
1	23596824	23597339	1	1	0	MER41B
1	24543278	24544885	0	1	0	MER41C
1	24677029	24685562	1	1	0	MER41B
1	25707881	25708339	1	1	1	MER41B
1	26480364	26488527	1	1	1	MER41A
1	26632947	26638182	1	1	1	MER41B
1	31137926	31140447	1	1	1	MER41A
1	31143004	31147877	1	1	1	MER41A
1	31561790	31564220	1	1	1	MER41B
1	31588278	31591039	0	1	0	MER41A;MER41B
1	37901488	37904141	0	1	1	MER41A
1	37905976	37909778	1	1	1	MER41A
1	37912241	37915151	0	1	0	MER41A
1	40910435	40911297	0	0	1	MER41C
1	43134425	43138173	0	1	0	MER41A
1	49341235	49341483	0	1	0	MER41C
1	55231733	55240882	1	0	1	MER41B
1	61963017	61977836	1	1	1	MER41A
1	65530848	65531077	1	0	0	MER41A
1	70361443	70369729	1	1	1	MER41B
1	70985222	70986834	1	1	1	MER41A
1	77776730	77777341	1	1	1	MER41C
1	85223093	85228146	1	1	1	MER41E
1	94616737	94619244	1	0	0	MER41B
1	94858082	94859158	1	1	0	MER41A
1	105490408	105490718	0	1	0	MER41B
1	107642205	107642593	1	0	0	MER41A
1	112830012	112833610	1	1	1	MER41C
1	116855178	116861446	1	1	1	MER41A
1	121080272	121081211	1	1	0	MER41B
1	143730775	143731155	1	0	0	MER41E
1	143867606	143867862	1	0	0	MER41B
1	144561999	144562320	1	0	0	MER41E
1	147718674	147719920	1	0	1	MER41B
1	147720428	147720932	1	0	1	MER41B
1	161489912	161491393	0	0	1	MER41C
1	165673448	165673772	1	0	0	MER41B
1	165674165	165674430	1	0	0	MER41B
1	166692226	166693636	1	0	0	MER41A
1	167713597	167719027	1	1	1	MER41D
1	168303715	168304098	1	0	0	MER41B
1	169494467	169499918	1	1	1	MER41C
1	175128311	175130797	1	1	1	MER41C
1	175266199	175273678	1	1	1	MER41C
1	178260710	178281933	1	1	1	MER41A
1	183621719	183623168	1	1	1	MER41A
1	184881017	184883494	0	0	1	MER41A
1	186228256	186228623	1	0	0	MER41A
1	189537544	189539992	1	1	1	MER41C
1	195336642	195337423	0	1	0	MER41B
1	198067569	198069833	0	1	0	MER41D
1	199308589	199311315	0	1	0	MER41B
1	202530846	202533863	1	1	1	MER41B
1	202863606	202863954	1	1	0	MER41D
1	202864182	202864466	1	0	0	MER41D
1	203599125	203602739	1	1	0	MER41A
1	203753124	203762224	1	1	1	MER41A;MER41B
1	203762556	203762935	1	1	0	MER41A
1	203777944	203784919	1	1	1	MER41B
1	209381313	209391172	1	0	1	MER41A
1	209408840	209417858	1	0	1	MER41A
1	210278663	210280301	1	0	0	MER41B
1	211524193	211525830	1	0	0	MER41B
1	213209196	213209771	0	1	0	MER41B
1	213210142	213212050	1	1	0	MER41B
1	215579906	215585695	1	1	1	MER41B
1	223030702	223035068	1	1	1	MER41A
1	224273102	224273858	1	1	1	MER41B
1	228448828	228449106	1	1	0	MER41B
1	228684526	228685554	1	0	0	MER41A
1	229447374	229448649	1	0	0	MER41B
1	230127701	230143340	1	1	1	MER41B
1	230143604	230157142	0	1	1	MER41A
1	233735134	233737357	1	1	1	MER41B
1	234492431	234496710	1	1	1	MER41A
1	235385183	235388062	0	1	1	MER41A
1	235406132	235411430	1	1	1	MER41A
1	235546125	235546396	0	0	1	MER41A
1	238061942	238062180	1	0	0	MER41G
1	239235161	239235787	1	0	0	MER41A
1	240643563	240651940	1	1	1	MER41D
1	241696229	241698821	1	1	1	MER41B
1	244815980	244822978	1	1	0	MER41A
10	3880217	3900574	1	1	1	MER41B
10	4450188	4454251	1	0	0	MER41B
10	6296310	6298013	1	1	1	MER41B
10	10222452	10223189	0	1	1	MER41A
10	13537077	13539234	1	1	0	MER41A
10	14374103	14382386	1	1	0	MER41B
10	14407001	14408474	1	1	0	MER41A
10	14413547	14417363	1	1	0	MER41A
10	14776554	14786624	1	1	1	MER41B;MER41C
10	16684461	16687037	1	1	0	MER41A
10	19766195	19771245	0	1	1	MER41D
10	21282034	21283628	1	1	0	MER41A
10	21964214	21966951	1	1	1	MER41C
10	23049775	23054786	1	1	1	MER41A;MER41B
10	25109990	25110447	1	1	0	MER41B
10	25802482	25808033	1	0	1	MER41C
10	26247438	26249262	1	0	0	MER41A
10	27150549	27151342	1	0	1	MER41B
10	27199377	27200219	1	1	0	MER41A
10	30420963	30430086	1	1	1	MER41B
10	32252189	32254603	1	0	0	MER41A
10	46103801	46105248	1	1	1	MER41C
10	46278006	46283450	0	1	1	MER41C
10	49549575	49550727	1	1	0	MER41B
10	57784514	57787837	1	1	1	MER41B
10	57898747	57899283	1	1	0	MER41B
10	62339783	62341053	0	1	0	MER41B
10	67277832	67281049	1	0	0	MER41B
10	68092919	68095962	1	1	1	MER41B
10	70981986	70988288	1	1	1	MER41B
10	74178059	74181056	1	1	1	MER41B
10	80013904	80015096	1	1	1	MER41B
10	80966621	80968409	1	1	1	MER41A;MER41B
10	84488181	84501681	1	1	1	MER41B
10	84632256	84632996	0	1	1	MER41C
10	93273801	93275316	1	1	1	MER41B
10	96106951	96107848	0	1	0	MER41B
10	103179046	103179407	1	0	0	MER41B
10	103526037	103529749	1	1	1	MER41B
10	104251880	104252555	1	0	0	MER41C
10	106492647	106494540	1	0	0	MER41B
10	114829015	114831085	1	1	1	MER41B
10	115996413	115999476	1	1	1	MER41A
10	118957184	118964500	1	1	1	MER41A
10	119686263	119690794	1	1	1	MER41A
10	123780316	123785016	1	1	0	MER41B
10	123942489	123943580	0	1	1	MER41B
10	125926309	125928734	0	1	1	MER41A
10	127199642	127201054	0	0	1	MER41C
11	349317	351939	1	0	0	MER41A
11	355105	356507	1	1	1	MER41A
11	735976	743047	1	1	1	MER41B
11	6283958	6284187	1	0	0	MER41A
11	6992221	6992874	0	1	1	MER41D
11	7909169	7911022	1	1	1	MER41B
11	9320383	9321802	0	1	0	MER41E
11	9598269	9598711	0	1	0	MER41D
11	12041133	12045703	1	1	0	MER41B
11	18680348	18682043	0	1	0	MER41B
11	18682265	18682666	0	1	0	MER41B
11	27447473	27449559	1	1	1	MER41B
11	35721879	35722413	0	0	1	MER41A
11	36023377	36032231	1	0	1	MER41B
11	42064697	42065186	1	0	0	MER41C
11	43951660	43953222	1	1	1	MER41B
11	44529919	44530604	0	1	0	MER41B
11	44530907	44531434	0	1	0	MER41B
11	47859431	47862644	1	1	1	MER41C
11	57900517	57904946	1	1	1	MER41A
11	59547054	59548415	1	1	0	MER41B
11	59732734	59735490	1	1	0	MER41B
11	64414486	64415406	1	0	0	MER41A
11	64540320	64544619	1	1	1	MER41D
11	67562590	67564603	1	1	0	MER41A
11	68136991	68137705	0	1	0	MER41B
11	68275078	68275740	1	0	1	MER41E
11	69038848	69039668	0	1	0	MER41C
11	70389420	70391116	1	1	1	MER41A
11	73528607	73529439	0	1	0	MER41C
11	75184389	75185873	1	1	1	MER41C
11	75186121	75186917	1	1	0	MER41C
11	77752021	77753475	1	1	0	MER41A
11	87054096	87057255	1	1	1	MER41C
11	87913514	87916168	0	1	0	MER41B
11	104748050	104749254	1	0	0	MER41A
11	107880287	107883673	1	1	1	MER41A
11	107934949	107935778	0	1	0	MER41C
11	107936027	107936903	0	1	0	MER41C
11	108517643	108521339	1	1	0	MER41A
11	110298347	110299296	1	1	1	MER41B
11	110335019	110342749	1	1	1	MER41B
11	110347849	110348456	0	1	0	MER41A
11	112239581	112243896	1	1	1	MER41D
11	112250257	112252447	1	1	0	MER41D
11	118853526	118853816	0	1	0	MER41B
11	119201634	119203798	1	0	0	MER41A
11	120641474	120643424	0	1	1	MER41B
11	123215092	123219912	1	1	1	MER41B
11	129074275	129079697	1	1	0	MER41B
12	512865	513486	1	0	0	MER41A
12	627744	628553	1	1	1	MER41B
12	628797	629872	1	1	1	MER41B
12	7824144	7828448	1	0	1	MER41A
12	9660537	9660836	0	1	1	MER41D
12	11622374	11624266	1	1	1	MER41A
12	14924710	14925199	1	0	0	MER41A
12	15949710	15950846	1	1	0	MER41A
12	17535880	17539620	1	1	1	MER41C
12	18752860	18753673	1	0	1	MER41B
12	19424239	19438567	1	1	1	MER41B
12	24848369	24868208	1	1	1	MER41B
12	24889260	24891553	1	0	0	MER41B
12	24969247	24972634	1	1	0	MER41B;MER41D
12	26748060	26754795	1	1	0	MER41A
12	28000335	28001124	1	0	0	MER41A
12	31650353	31651101	1	1	1	MER41A
12	32429091	32430395	1	1	0	MER41B
12	32687899	32688458	1	0	0	MER41B
12	32942147	32947885	1	1	1	MER41B
12	33010573	33013698	1	1	0	MER41B
12	38892672	38893803	1	0	1	MER41A
12	39121227	39127496	1	0	1	MER41B
12	43341763	43342387	0	1	0	MER41B
12	43649094	43649424	0	1	0	MER41A
12	46472161	46476804	1	1	1	MER41A
12	48293745	48295569	0	0	1	MER41B
12	48881827	48883102	1	0	0	MER41D
12	54929695	54933526	0	1	0	MER41B
12	54933755	54935691	0	1	0	MER41B
12	56699508	56700960	0	1	0	MER41B
12	58410264	58416130	1	1	1	MER41B
12	67420148	67421178	0	1	0	MER41A
12	71590307	71591759	0	1	0	MER41A
12	75488259	75488968	0	0	1	MER41A
12	79546513	79549599	1	1	1	MER41A
12	80205762	80223130	1	1	1	MER41B
12	87439217	87441905	1	1	1	MER41C
12	88143514	88143934	1	0	0	MER41B
12	93896677	93901050	1	1	1	MER41E
12	96082046	96084018	0	1	0	MER41B
12	98340629	98347396	1	1	0	MER41A;MER41B
12	98508513	98509219	0	1	1	MER41A
12	108931524	108936138	1	1	0	MER41A
12	110840696	110841048	1	1	1	MER41A
12	113581855	113584201	1	0	0	MER41A
12	118306189	118311126	1	0	1	MER41A
12	122460534	122472796	1	1	1	MER41A
13	24630980	24631587	1	0	1	MER41A
13	25114284	25118056	1	1	0	MER41C
13	31097725	31098966	1	0	0	MER41A
13	34621611	34623824	1	1	1	MER41A
13	36861478	36863151	0	1	0	MER41B
13	37384008	37387377	0	1	0	MER41B
13	39801738	39803423	0	1	0	MER41A
13	39803690	39803973	0	1	0	MER41A
13	42982230	42982713	0	1	0	MER41A
13	43130917	43132900	0	1	0	MER41B
13	45517190	45534575	1	1	1	MER41C
13	48238692	48240292	1	1	1	MER41B
13	49949748	49956780	1	1	1	MER41A
13	50649352	50649563	0	0	1	MER41B
13	51637310	51640186	0	1	1	MER41C
13	63186504	63188616	1	1	1	MER41B
13	66073634	66075147	1	1	1	MER41A
13	70320348	70320583	1	0	0	MER41B
13	77950071	77954297	1	1	1	MER41C
13	85498724	85498957	0	0	1	MER41A
13	97189807	97206970	1	1	1	MER41B
13	102236002	102236350	0	1	0	MER41C
13	103223089	103226950	0	1	0	MER41G
13	110608635	110612092	1	1	1	MER41G
13	110956966	110959149	1	1	0	MER41A
13	112637847	112639804	1	1	1	MER41C
13	113378966	113381479	1	0	0	MER41A
13	113389767	113392236	1	0	0	MER41A
14	20493070	20494149	1	0	0	MER41D
14	35958938	35959286	1	0	0	MER41B
14	43789915	43791609	1	1	0	MER41A
14	50333177	50336656	1	1	1	MER41B
14	50936179	50939741	1	1	1	MER41B
14	61125172	61125438	1	0	0	MER41A
14	63436038	63440211	1	1	0	MER41B
14	64638797	64648242	1	1	1	MER41A
14	65367380	65373001	1	1	1	MER41B
14	65430218	65434561	1	1	1	MER41A
14	67268122	67270951	1	1	1	MER41B
14	69619020	69620086	0	1	0	MER41A
14	71129219	71131611	1	1	1	MER41B
14	71288638	71291847	1	1	1	MER41B
14	72907415	72908144	1	0	0	MER41A
14	73525600	73527843	0	1	1	MER41A
14	75599664	75603590	1	1	1	MER41B
14	84484642	84485129	1	0	0	MER41B
14	89439063	89444007	1	1	0	MER41A
14	90417248	90424683	0	1	0	MER41A
14	90476060	90476804	0	1	0	MER41A
14	91117313	91119049	1	1	1	MER41B
14	91617884	91619241	0	1	0	MER41A
14	92561257	92574263	1	1	1	MER41B
14	94089089	94089451	1	0	0	MER41B
14	95675287	95682038	1	1	1	MER41B
14	96459165	96470301	1	1	1	MER41C;MER41D
14	101918622	101919430	1	0	1	MER41B
14	102533132	102534280	1	0	0	MER41A
14	102550266	102551169	1	0	0	MER41A
14	102551427	102553655	1	1	1	MER41A
15	23514596	23514956	0	0	1	MER41B
15	31156767	31158904	1	1	1	MER41C
15	33082945	33085114	1	1	0	MER41B
15	35695506	35701848	1	1	1	MER41B
15	41137959	41140243	1	1	0	MER41B
15	41579871	41590936	1	1	1	MER41A
15	41592407	41595280	1	1	1	MER41B
15	50670427	50670721	0	0	1	MER41B
15	51354975	51355258	0	1	0	MER41B
15	51355757	51356257	0	1	0	MER41B
15	53769360	53769811	1	1	0	MER41B
15	56081328	56083557	1	1	1	MER41C
15	59378428	59389893	1	1	1	MER41C
15	59760481	59761080	0	1	0	MER41B
15	63225926	63236622	1	1	1	MER41A
15	66828626	66832473	0	1	0	MER41B
15	66865296	66867500	1	1	0	MER41B
15	67920819	67921610	1	0	0	MER41B
15	80673535	80675388	0	1	1	MER41A
15	85157514	85158986	1	1	0	MER41A
15	89778866	89787323	1	1	1	MER41B
15	90321390	90322314	1	0	0	MER41A
15	90323051	90323472	1	0	1	MER41B
15	90459814	90460385	0	0	1	MER41A
15	90639775	90648517	1	1	1	MER41B
15	90648756	90649895	1	1	0	MER41B
15	95871514	95875577	1	1	1	MER41B
16	1292872	1293735	1	1	0	MER41A
16	2502016	2503945	1	1	0	MER41B
16	4772308	4775415	1	1	1	MER41B
16	7035885	7036718	0	0	1	MER41A
16	10301988	10302291	0	1	0	MER41B
16	10324486	10325673	1	0	1	MER41A
16	10327545	10329658	1	1	1	MER41C
16	10341063	10343714	0	0	1	MER41A
16	11799644	11802292	1	1	1	MER41G
16	12612169	12612588	1	1	1	MER41C
16	12612931	12613657	1	1	1	MER41C
16	12806828	12810304	1	1	0	MER41B
16	15486813	15491207	1	1	1	MER41B
16	17591467	17591729	0	1	0	MER41B
16	21388220	21390080	0	1	0	MER41B
16	23171224	23171693	0	1	1	MER41G
16	24533962	24534277	0	1	0	MER41D
16	25037491	25046130	1	1	1	MER41B
16	25571159	25571601	1	0	0	MER41B
16	25679211	25679822	0	1	0	MER41B
16	27363922	27367122	1	1	0	MER41A
16	28326802	28331084	0	1	1	MER41B
16	29367567	29368213	0	1	0	MER41B
16	48162629	48163715	0	1	0	MER41A
16	52646028	52646445	0	1	0	MER41B
16	53412877	53421636	1	1	1	MER41B
16	54583528	54584186	1	1	0	MER41C
16	57226800	57227346	1	1	1	MER41B
16	60632974	60637607	1	1	1	MER41A
16	62257994	62258239	1	0	0	MER41B
16	65762828	65774297	1	1	1	MER41B
16	68991520	69001293	1	1	1	MER41B
16	69070251	69070558	1	0	0	MER41C
16	69070682	69074079	1	1	1	MER41C
16	69172691	69173260	1	0	0	MER41A
16	71437426	71438063	1	0	1	MER41D
16	74280453	74280822	1	0	0	MER41C
16	75419751	75420514	0	1	0	MER41A
16	75559063	75559366	1	0	0	MER41B
16	75559496	75560126	1	1	0	MER41B
16	77739044	77739635	0	1	0	MER41B
16	77990664	77996528	1	1	1	MER41C
16	85013100	85017752	1	1	1	MER41E
16	85018109	85019516	1	1	0	MER41E
16	85971313	85971637	1	0	0	MER41A
17	4001306	4003308	1	1	0	MER41A
17	4348589	4357315	1	1	1	MER41B
17	10204297	10212117	1	1	1	MER41B
17	13638579	13639379	0	1	0	MER41B
17	15561624	15561903	1	0	0	MER41A
17	19985114	19988384	1	1	1	MER41B
17	27476197	27478700	1	0	1	MER41A
17	27574981	27575311	1	1	1	MER41B
17	28113224	28113480	1	0	0	MER41A
17	28239220	28245668	0	1	1	MER41B
17	29343521	29344335	0	1	1	MER41D
17	29344574	29345939	1	1	1	MER41D
17	30301586	30303926	0	1	0	MER41B
17	33370252	33372072	0	1	0	MER41C
17	34608939	34612492	1	0	0	MER41E
17	40604583	40609467	1	1	1	MER41C
17	41672070	41678999	1	1	1	MER41B;MER41C
17	42529288	42529991	1	1	1	MER41B
17	42531196	42531854	1	1	1	MER41B
17	43594366	43599666	1	1	1	MER41B
17	43944434	43946409	1	1	1	MER41B
17	45044253	45049411	1	1	1	MER41B
17	49261723	49262047	0	1	0	MER41A
17	54805952	54810072	1	1	1	MER41A
17	57023955	57024280	1	0	0	MER41B
17	60667968	60670298	0	1	0	MER41B
17	63024223	63025295	0	0	1	MER41A
17	64426910	64434741	0	1	1	MER41B
17	64436817	64437354	0	1	0	MER41B
17	64437581	64445797	1	1	1	MER41B
17	71340738	71341361	1	0	0	MER41A
17	71936607	71937010	1	0	0	MER41B
17	75155575	75160807	1	1	1	MER41A
17	76555206	76556455	1	1	1	MER41A
17	76599877	76605686	1	1	1	MER41A;MER41B
17	76797025	76797371	1	1	0	MER41B
17	76800007	76802373	1	1	0	MER41B
17	78986403	78989597	1	1	1	MER41A
17	79010864	79012692	1	1	1	MER41B
17	79016070	79017665	1	1	1	MER41B
17	79017858	79018679	1	1	1	MER41B
17	80150922	80154027	1	1	1	MER41B
17	82338459	82339685	1	0	0	MER41G
18	404010	407122	1	1	1	MER41A
18	417357	418482	1	1	1	MER41A
18	2144271	2144983	0	0	1	MER41C
18	5101138	5101540	0	1	0	MER41E
18	9493412	9497904	1	1	1	MER41B
18	11941398	11948528	1	1	1	MER41A
18	23035254	23038230	0	1	0	MER41B
18	23281320	23286611	1	1	1	MER41B
18	23698434	23700309	0	1	0	MER41C
18	31215580	31218992	1	0	1	MER41B
18	35748248	35750910	0	1	0	MER41B
18	40613013	40613311	1	0	1	MER41C
18	43068052	43068940	1	1	0	MER41C
18	46158399	46161073	1	0	0	MER41B
18	48961652	48961884	1	1	0	MER41A
18	49310679	49317835	1	1	1	MER41A
18	50088678	50096489	1	1	1	MER41B
18	50542806	50545226	0	1	0	MER41B
18	57210069	57211132	1	1	0	MER41B
18	58506516	58509741	0	1	0	MER41A
18	62863949	62864447	1	0	0	MER41B
18	68437777	68439782	1	1	1	MER41B
18	68554955	68556083	0	1	0	MER41B
18	70273639	70283135	1	1	1	MER41B
19	2167873	2173791	1	1	1	MER41D
19	2952078	2954675	1	1	1	MER41B
19	4242218	4245050	1	1	1	MER41D
19	5856442	5860725	1	1	1	MER41A
19	8158905	8164820	1	1	0	MER41A
19	9073493	9077953	1	0	0	MER41A
19	16475339	16479678	1	1	1	MER41A
19	16817788	16827566	1	1	1	MER41A;MER41B
19	17286012	17288278	1	1	0	MER41A
19	17591361	17594170	0	1	0	MER41A
19	18408717	18409139	1	0	0	MER41B
19	21021981	21025344	1	0	0	MER41A
19	21145998	21146324	0	0	1	MER41A
19	21365978	21366744	1	0	0	MER41A
19	23699965	23700483	1	0	0	MER41C
19	24166319	24168676	0	1	0	MER41B
19	33035239	33036170	1	1	0	MER41C
19	35165692	35166139	1	0	0	MER41B
19	36744769	36748285	1	1	1	MER41A
19	39250552	39251729	1	1	0	MER41C
19	42486414	42490622	1	0	0	MER41B
19	42970022	42973596	1	1	1	MER41A;MER41C
19	43122970	43127828	0	1	0	MER41A;MER41C
19	44588079	44589234	1	1	1	MER41B
19	44591910	44593316	1	0	1	MER41B
19	48265428	48265922	0	1	0	MER41A
19	48877169	48879774	1	1	1	MER41E
19	49715700	49718767	1	1	1	MER41B
19	50171546	50175703	1	1	1	MER41D
19	52567004	52567854	0	1	1	MER41D
19	53357310	53358032	0	1	0	MER41A
19	53575620	53584736	1	1	1	MER41C
19	57797561	57808814	1	1	1	MER41B
19	57847625	57848101	0	1	0	MER41B
2	1753155	1753611	1	0	0	MER41B
2	1772038	1778730	1	1	1	MER41B
2	8619444	8621897	0	1	1	MER41B
2	9167300	9173111	1	1	1	MER41B
2	11120056	11124658	1	1	1	MER41A
2	18343212	18343573	0	1	0	MER41A
2	20368577	20370348	1	1	1	MER41D
2	21747563	21750111	1	1	1	MER41B
2	25643951	25645552	0	1	0	MER41A
2	26752642	26762971	1	1	1	MER41A;MER41B
2	31281500	31289864	1	1	1	MER41A
2	32931996	32936303	1	1	1	MER41B
2	38775904	38777050	1	0	1	MER41C
2	39465193	39472180	1	1	1	MER41A
2	39472597	39473245	1	1	0	MER41B
2	40399284	40403076	1	1	1	MER41B
2	42544251	42547869	1	1	1	MER41D
2	44104992	44115986	1	1	1	MER41A
2	47727006	47730156	1	1	1	MER41A
2	48037566	48052835	1	1	1	MER41A
2	48061466	48061698	0	1	0	MER41A
2	48256670	48262280	0	1	1	MER41C
2	61634357	61643096	1	1	1	MER41B
2	61645400	61648623	0	1	0	MER41B
2	61649092	61652592	0	1	0	MER41A;MER41B
2	69448565	69454179	1	1	1	MER41A
2	79779212	79782591	1	1	0	MER41A
2	98046259	98046789	1	1	0	MER41A
2	98049064	98060595	1	1	1	MER41A
2	99606033	99613157	1	1	1	MER41A
2	101237019	101238107	1	0	1	MER41B
2	102782831	102785843	1	1	1	MER41A
2	105255284	105257471	1	1	0	MER41A
2	105467422	105468091	1	1	1	MER41B
2	105468363	105468699	1	0	0	MER41B
2	106529988	106532775	1	1	0	MER41A;MER41B
2	109643205	109649005	1	1	1	MER41A
2	112789777	112796889	1	1	1	MER41B
2	114062729	114063191	0	1	0	MER41B
2	119256677	119260765	0	1	0	MER41B
2	123441704	123442649	0	1	0	MER41B
2	129727473	129728416	1	0	0	MER41B
2	134179697	134181428	1	1	1	MER41B
2	134589711	134589948	0	1	0	MER41B
2	134590137	134590857	1	1	0	MER41A
2	134590964	134592301	1	1	0	MER41A
2	134901351	134912651	1	1	1	MER41B
2	135255290	135258693	0	1	1	MER41B
2	142970840	142981634	1	1	1	MER41B
2	145853732	145854663	1	1	0	MER41B
2	152303144	152303847	0	0	1	MER41B
2	152304219	152304907	1	0	1	MER41B
2	163624514	163629351	1	1	1	MER41B
2	163848858	163852519	1	1	1	MER41B
2	165581050	165588139	1	0	1	MER41C
2	172835580	172841531	1	1	1	MER41A
2	173351612	173353852	1	1	0	MER41A
2	174684861	174685522	0	0	1	MER41A
2	183805182	183805823	0	0	1	MER41G
2	191306936	191307285	1	0	1	MER41B
2	191307581	191308529	1	0	0	MER41B
2	191320765	191326572	1	1	1	MER41B
2	191599697	191600160	1	0	0	MER41A
2	196535908	196540832	1	1	1	MER41C
2	202359760	202364550	1	1	0	MER41A
2	207772047	207772628	1	0	0	MER41B
2	207789240	207799150	1	0	1	MER41B
2	207804041	207808721	1	1	0	MER41E
2	215617459	215619163	1	1	0	MER41A
2	218301098	218301368	0	1	0	MER41A
2	222898004	222903424	1	1	1	MER41C
2	226472879	226485544	1	1	0	MER41A
2	231005953	231019751	1	1	1	MER41C
2	234362008	234365775	1	1	1	MER41B
2	235442726	235446121	1	1	1	MER41A
20	926482	926830	0	0	1	MER41D
20	4214445	4219161	1	1	1	MER41B
20	4308492	4314041	1	1	1	MER41A
20	5634983	5638476	0	1	1	MER41A
20	7691151	7693140	1	1	0	MER41B
20	12286524	12288801	1	1	1	MER41C
20	17549704	17552005	0	1	1	MER41D
20	24130576	24135644	1	1	0	MER41B
20	25029988	25031256	0	1	0	MER41D
20	31505028	31507649	1	1	0	MER41B
20	34319538	34324036	1	1	0	MER41A;MER41B
20	37559129	37560806	1	1	1	MER41B;MER41C
20	37561044	37561329	0	1	0	MER41C
20	37561972	37563992	0	1	0	MER41A
20	44676924	44680290	1	1	1	MER41D
20	45331161	45333555	1	1	1	MER41B
20	46635766	46638580	1	0	1	MER41B
20	48138382	48139468	0	1	0	MER41B
20	48155574	48158545	1	1	1	MER41B
20	48278039	48281631	1	0	0	MER41C
20	49673974	49685669	1	1	1	MER41B
20	49758623	49766411	1	1	1	MER41A;MER41B
20	50433822	50442373	1	1	1	MER41A
20	50990325	50993763	1	1	0	MER41D
20	51091621	51094549	1	1	0	MER41B
20	51338202	51339970	0	1	1	MER41B
20	51777741	51778903	1	1	0	MER41A
20	56829697	56834889	1	1	1	MER41A
20	63231748	63234260	1	0	1	MER41A
21	16386995	16390926	1	1	1	MER41C
21	17688446	17691478	1	1	1	MER41B
21	26714366	26716057	1	1	1	MER41A
21	29378520	29388252	1	1	1	MER41A
21	32790396	32790625	0	0	1	MER41A
21	33234639	33235027	1	0	0	MER41B
21	33253473	33253848	0	0	1	MER41A
21	39709278	39710846	0	1	0	MER41A
21	42929013	42947457	1	0	1	MER41A
21	42968765	42971548	1	1	1	MER41B
21	44845494	44846832	1	1	0	MER41C
21	45010381	45014565	1	1	0	MER41E
22	20840184	20848961	1	1	1	MER41A
22	24194731	24212718	1	1	1	MER41A
22	26567249	26569753	1	1	1	MER41B
22	28543225	28545572	1	1	0	MER41B
22	29152291	29154312	0	1	0	MER41B
22	31798185	31801987	1	1	1	MER41C
22	35668293	35668747	1	0	0	MER41A
22	36425930	36427526	1	0	0	MER41A
22	36975741	36978157	1	1	1	MER41B
22	40641225	40643240	0	0	1	MER41B
22	42697214	42701489	1	1	0	MER41A
22	42733384	42746138	1	1	1	MER41A
22	43124032	43124930	0	1	0	MER41B
22	43125278	43129250	1	1	1	MER41B
22	44746397	44749115	1	1	0	MER41B
22	45158182	45160938	1	1	1	MER41C
3	3706055	3710596	1	1	1	MER41A;MER41C
3	4059904	4072084	1	1	1	MER41B
3	13429942	13430318	0	1	0	MER41A
3	13430705	13431631	0	1	0	MER41A
3	13938586	13939135	1	1	0	MER41C
3	13939470	13940652	1	1	1	MER41C
3	13946099	13956100	1	1	1	MER41C
3	15345129	15351696	1	1	1	MER41A
3	15385158	15388794	0	1	0	MER41B
3	15401241	15401917	0	1	0	MER41B
3	15402935	15405213	1	1	1	MER41A
3	31308507	31313924	1	1	1	MER41B
3	34568172	34570368	1	0	1	MER41B
3	38055812	38056770	0	1	1	MER41B
3	39165579	39168960	1	1	1	MER41A
3	41966718	41971463	1	1	1	MER41B
3	45061706	45062677	1	0	0	MER41A;MER41B
3	45063005	45067097	1	1	0	MER41B
3	46385264	46387098	1	1	1	MER41E
3	46425806	46435720	1	1	1	MER41B
3	53902888	53904197	1	0	0	MER41C
3	54980275	54985328	1	1	1	MER41A
3	59105988	59106386	0	1	0	MER41A
3	72027119	72031101	1	1	1	MER41A
3	80731353	80737892	1	1	1	MER41B
3	99776163	99776758	0	1	0	MER41B
3	110796943	110799390	0	1	1	MER41B
3	111479831	111480662	0	1	0	MER41A
3	112388211	112403813	1	1	1	MER41C
3	117032845	117033798	1	1	0	MER41A
3	117034065	117035714	1	0	0	MER41A
3	118478462	118479353	0	0	1	MER41B
3	118529491	118533018	1	1	1	MER41B
3	118589005	118591504	0	1	0	MER41A
3	118593591	118594669	0	1	0	MER41A
3	120099019	120102058	1	1	1	MER41A
3	120466123	120476153	1	1	1	MER41B
3	127731652	127733969	1	0	1	MER41A
3	128661099	128666757	1	1	1	MER41C
3	129690552	129697160	1	1	1	MER41A
3	129698659	129700579	1	1	0	MER41B
3	132977967	132980005	0	1	1	MER41A
3	138844768	138848500	1	1	1	MER41A
3	142945995	142948239	0	1	0	MER41A
3	146502713	146505711	1	1	0	MER41B
3	150597449	150598451	1	1	1	MER41E
3	151973670	151974258	1	0	1	MER41C
3	155424176	155425990	0	0	1	MER41A
3	161140271	161140522	1	0	0	MER41C
3	165456740	165457036	1	0	0	MER41C
3	165457333	165458010	1	0	0	MER41C
3	166455973	166456491	1	0	1	MER41B
3	170320088	170322334	0	1	0	MER41A
3	170333648	170335209	0	1	0	MER41A
3	172658301	172658557	0	1	0	MER41A
3	172721004	172726504	0	1	0	MER41B;MER41C
3	185267534	185268572	0	1	0	MER41B
3	191236306	191236542	0	1	0	MER41C
3	194921169	194924587	0	1	1	MER41A
3	195601745	195602025	0	1	0	MER41B
4	6311836	6315088	1	1	1	MER41C
4	8241717	8243674	1	1	1	MER41B
4	10980773	10981476	1	0	0	MER41C
4	10981762	10983909	1	1	1	MER41C
4	12612308	12618967	1	1	1	MER41A
4	15568054	15569790	1	0	0	MER41C
4	15868193	15870897	0	0	1	MER41C
4	18644544	18645330	1	0	0	MER41C
4	18870972	18872079	1	0	0	MER41A
4	18872312	18872950	1	0	0	MER41A
4	25725334	25725967	1	1	1	MER41B
4	37668415	37671324	1	1	1	MER41B
4	37671577	37672949	1	1	1	MER41B
4	38258158	38261103	0	1	0	MER41A
4	40266635	40267111	1	0	0	MER41A
4	48952527	48959504	1	1	1	MER41A;MER41C
4	54237066	54239788	0	1	1	MER41B
4	54253617	54257799	0	1	1	MER41B
4	56694146	56702040	0	1	1	MER41B
4	56755614	56760485	1	1	1	MER41B
4	61553743	61557877	1	1	1	MER41A
4	63697218	63698379	0	0	1	MER41C
4	67720732	67722581	1	1	0	MER41B
4	71881783	71882273	1	1	0	MER41C
4	74092727	74094072	1	0	1	MER41C
4	87367863	87369096	1	1	0	MER41A
4	88606687	88614685	1	1	1	MER41A
4	98816041	98819404	1	0	0	MER41A
4	99164787	99166890	1	1	1	MER41B
4	99734003	99734642	0	1	0	MER41A
4	100702723	100706372	0	0	1	MER41A
4	106302143	106306307	1	1	1	MER41A
4	107333867	107334374	1	0	0	MER41C
4	107350397	107352798	1	0	1	MER41C
4	109607359	109612138	1	1	1	MER41A
4	110104876	110110778	1	1	1	MER41B
4	112752223	112754033	1	1	0	MER41A
4	118358950	118359322	1	0	0	MER41B
4	121270888	121272577	1	0	0	MER41D
4	125040701	125041177	1	0	0	MER41A
4	128319360	128328259	1	1	1	MER41B
4	135174060	135174565	1	0	0	MER41C
4	137468330	137469661	0	0	1	MER41C
4	138974037	138985358	1	1	1	MER41C
4	143362517	143365831	1	1	1	MER41B
4	147707070	147716410	1	1	1	MER41B
4	153537337	153537593	1	0	0	MER41A
4	156346076	156349230	1	1	1	MER41B
4	163385076	163386115	1	0	1	MER41B
4	168766112	168767419	1	0	0	MER41A
4	172898940	172900871	1	1	1	MER41A
4	175441331	175453823	1	1	1	MER41C
4	177518636	177520480	0	1	1	MER41E
4	182261774	182265630	1	1	1	MER41A
4	182267310	182268851	1	0	1	MER41A
4	183347752	183348951	0	1	0	MER41B
5	16742867	16753689	1	1	1	MER41A
5	27817508	27817770	0	1	0	MER41A
5	31361262	31367863	0	1	1	MER41A;MER41B
5	31391892	31398848	0	1	0	MER41C
5	34520735	34525260	1	1	1	MER41A
5	41523960	41529973	1	1	1	MER41B
5	44793700	44794432	0	0	1	MER41C
5	54569057	54573803	1	0	0	MER41C
5	54820155	54822956	1	1	1	MER41B
5	55624210	55626083	0	1	0	MER41A
5	57731994	57737523	1	1	1	MER41A
5	62618832	62627403	1	1	1	MER41B
5	65098722	65101712	1	0	0	MER41D
5	73989616	73990086	1	0	0	MER41A
5	74591810	74592063	1	0	0	MER41A
5	76793219	76794016	1	0	0	MER41A
5	94039367	94045482	1	1	1	MER41A
5	95725880	95729334	1	1	1	MER41B
5	95791903	95792993	0	1	1	MER41A
5	97907342	97909615	1	1	1	MER41B
5	100821186	100824424	1	1	1	MER41A
5	103055484	103061460	1	1	1	MER41B
5	106586283	106586747	0	0	1	MER41A
5	108622651	108624708	1	1	1	MER41E
5	108813758	108814577	0	0	1	MER41C
5	113032927	113033209	0	1	0	MER41A
5	115926836	115932661	1	1	1	MER41A
5	116858351	116860946	1	0	0	MER41A
5	122609777	122613751	1	0	1	MER41C
5	126513710	126517882	1	1	1	MER41B
5	128545957	128547922	1	1	0	MER41B
5	132969219	132973307	1	1	1	MER41B
5	138843452	138846135	1	1	1	MER41B
5	142443139	142448154	1	1	1	MER41B
5	149914137	149920568	1	1	0	MER41E
5	153078010	153081523	1	1	1	MER41B
5	160157795	160161804	1	0	0	MER41B
5	160166514	160168263	1	0	0	MER41B
5	171361461	171362516	0	1	0	MER41A
5	172128044	172139097	1	1	1	MER41C
5	172313664	172316812	1	1	1	MER41A
5	175453930	175454329	0	1	0	MER41A
5	176418642	176419244	0	1	0	MER41A
5	179827259	179828190	0	1	0	MER41A
6	2919189	2921845	0	1	1	MER41B
6	3337549	3340469	1	0	0	MER41A
6	5540211	5543706	1	1	1	MER41B
6	7679140	7681993	1	1	0	MER41B
6	9504715	9505095	0	1	0	MER41A
6	13951780	13954896	1	0	0	MER41C
6	14964588	14966866	0	0	1	MER41B
6	15019646	15020049	0	1	1	MER41B
6	15206391	15208549	1	1	0	MER41A
6	15210401	15210805	0	1	0	MER41A
6	15893521	15911645	1	1	1	MER41B
6	21275316	21284459	1	1	1	MER41C
6	21399073	21399702	1	0	0	MER41B
6	25954031	25954806	0	0	1	MER41B
6	25955075	25956324	0	0	1	MER41A
6	26550213	26551420	0	1	1	MER41C
6	27136000	27136882	1	0	0	MER41B
6	27567589	27569850	1	0	0	MER41B
6	27882000	27886351	1	1	1	MER41A
6	27887833	27888261	1	0	0	MER41E
6	30852837	30856843	1	1	1	MER41B
6	33377864	33378117	1	0	0	MER41A
6	41188324	41195002	1	1	1	MER41B
6	42470686	42471017	0	1	0	MER41B
6	42780417	42780981	1	0	1	MER41B
6	56740071	56740466	1	0	0	MER41A
6	56907809	56910807	0	1	0	MER41A
6	73563830	73569782	1	1	1	MER41B
6	77087401	77095051	1	1	1	MER41D
6	79256371	79259201	0	1	1	MER41B
6	79260110	79265787	0	1	1	MER41B
6	81707910	81708280	0	1	0	MER41B
6	82252382	82253866	1	1	0	MER41B
6	107960922	107967228	1	1	1	MER41B
6	109421678	109426032	1	1	1	MER41A
6	110503703	110513207	1	1	1	MER41B
6	110817276	110822326	1	1	1	MER41B
6	112244571	112244794	0	0	1	MER41B
6	119036743	119042617	1	1	0	MER41A
6	120354789	120355162	1	0	0	MER41B
6	132003175	132004704	1	0	0	MER41A
6	135990701	135991212	0	1	1	MER41B
6	142025011	142027823	1	0	0	MER41C
6	143737797	143747464	1	1	1	MER41A
6	148443940	148444881	1	0	0	MER41B
6	148445319	148447195	1	1	0	MER41B
6	151229566	151230627	1	1	1	MER41B
6	152311875	152316714	1	0	1	MER41C
6	152334883	152335452	0	0	1	MER41C
6	157709979	157710588	0	1	0	MER41A
6	157751858	157756712	1	1	0	MER41A
6	158703304	158713016	1	1	0	MER41A
6	158892654	158894245	1	1	0	MER41B
6	165010973	165011424	0	0	1	MER41C
6	167480938	167482902	1	1	0	MER41B
6	169085800	169089490	0	1	1	MER41A
7	3258512	3264899	1	0	1	MER41A
7	4793901	4794775	1	0	1	MER41B
7	4795049	4795349	1	0	1	MER41B
7	7353356	7355799	1	1	0	MER41C
7	7793185	7803601	1	1	1	MER41B
7	19077333	19082086	1	1	1	MER41B
7	22569470	22588147	1	1	1	MER41D
7	29619390	29620010	0	1	1	MER41A
7	32678759	32682156	1	1	1	MER41B
7	35014240	35016328	1	0	0	MER41B
7	37549860	37551018	0	1	1	MER41B
7	37659775	37662560	0	1	1	MER41B
7	41557548	41561992	1	1	1	MER41C
7	41671986	41673203	0	1	0	MER41C
7	41673437	41676937	0	1	1	MER41C
7	41746403	41760312	1	1	1	MER41A;MER41B;MER41C
7	44716721	44717325	0	1	0	MER41A
7	44723397	44724529	0	0	1	MER41A
7	48082636	48086789	1	1	1	MER41B
7	51233162	51243072	1	1	1	MER41B
7	51620842	51623145	1	0	0	MER41C
7	54903275	54908136	0	1	1	MER41D
7	63827809	63828338	0	1	0	MER41C
7	64481936	64483420	0	0	1	MER41A
7	65781589	65783785	1	1	0	MER41A
7	67354960	67361446	1	1	1	MER41B
7	69106502	69107779	0	1	1	MER41B
7	73789738	73794993	1	1	1	MER41A
7	74131241	74137338	1	1	1	MER41B
7	74137810	74146630	1	1	1	MER41B
7	74149590	74167169	1	1	1	MER41B
7	80479450	80482019	1	1	1	MER41A
7	82696149	82696525	1	0	0	MER41B
7	82700233	82700710	0	1	0	MER41B
7	87358060	87358334	1	0	0	MER41D
7	88274037	88275445	0	1	0	MER41B
7	100915841	100918939	1	0	0	MER41B
7	100919328	100919897	1	0	0	MER41A
7	101489140	101489455	0	1	1	MER41C
7	105938144	105938461	0	1	0	MER41A
7	106459306	106461896	1	0	1	MER41B
7	111679311	111679767	1	0	0	MER41B
7	121503528	121506577	1	1	1	MER41A
7	125556506	125557706	0	0	1	MER41C
7	128901124	128901971	1	1	0	MER41A
7	131071839	131072412	0	0	1	MER41B
7	138358138	138361247	1	1	1	MER41A;MER41B
7	138657708	138658098	1	0	1	MER41B
7	140565229	140565969	1	0	1	MER41A
7	141585795	141588307	1	1	1	MER41B
7	149132249	149135606	1	1	1	MER41A
7	155021025	155021676	0	1	0	MER41A
7	155022030	155022701	0	1	0	MER41A
7	157306363	157312175	1	0	1	MER41B
8	569378	575918	1	1	1	MER41C
8	8941164	8947830	1	1	0	MER41B
8	17485383	17492172	1	1	1	MER41A
8	21570155	21570483	0	1	0	MER41B
8	26147054	26159340	1	1	1	MER41E
8	29614918	29618946	1	1	1	MER41B
8	36221725	36223652	1	1	0	MER41A
8	37880808	37887588	1	1	1	MER41C
8	38002034	38005088	0	1	0	MER41A
8	38624879	38629560	1	1	1	MER41A
8	38865592	38867770	1	1	1	MER41A
8	39003790	39005755	1	1	1	MER41B
8	39232515	39235257	1	1	0	MER41B
8	41184068	41187151	1	1	1	MER41B
8	41187379	41187674	1	1	0	MER41B
8	41457848	41458390	0	1	0	MER41B
8	54104184	54108379	1	1	1	MER41A;MER41B
8	54151480	54152028	1	1	1	MER41B
8	55211596	55214870	1	1	1	MER41C
8	58295522	58302613	1	1	1	MER41B
8	74601375	74602047	1	0	1	MER41B
8	74602342	74602646	1	0	1	MER41B
8	78338478	78342671	1	1	1	MER41E
8	78676716	78680161	1	0	1	MER41A
8	84852587	84852964	1	0	0	MER41C
8	89794626	89807078	1	1	1	MER41A;MER41B
8	90580225	90580571	1	0	0	MER41E
8	93222565	93222991	1	0	0	MER41B
8	93872568	93877035	1	1	1	MER41B
8	97421384	97428006	0	0	1	MER41C
8	97801855	97802178	1	0	0	MER41B
8	100761254	100766667	0	1	1	MER41A
8	101353838	101359487	1	1	1	MER41A
8	101458433	101462284	1	1	0	MER41A
8	101462883	101463355	1	1	0	MER41A
8	102091815	102092541	1	0	0	MER41A
8	121803262	121803946	0	1	0	MER41B
8	125635906	125644561	1	1	1	MER41A
8	136933193	136934647	0	1	1	MER41C
8	140772728	140775850	0	0	1	MER41B
8	143218409	143224524	1	1	1	MER41C
8	143546433	143547365	0	1	1	MER41B
8	143547541	143549148	0	1	1	MER41B
9	32160170	32160970	0	0	1	MER41B
9	32710243	32710602	0	1	0	MER41A
9	33095701	33113134	1	1	1	MER41B
9	34644434	34645606	1	1	1	MER41A
9	36385072	36389771	1	1	1	MER41A
9	36557459	36562997	1	1	1	MER41A;MER41B
9	38253166	38253516	0	1	0	MER41A
9	39602969	39603218	0	0	1	MER41B
9	42356690	42357941	0	0	1	MER41B
9	76351879	76353475	1	1	0	MER41A
9	76414875	76415208	0	1	0	MER41B
9	77890422	77894014	1	0	1	MER41B
9	82811188	82811698	1	1	0	MER41A
9	86892360	86895671	1	1	1	MER41A
9	87337220	87341093	1	1	1	MER41D
9	87462979	87468361	1	1	1	MER41B
9	88196181	88199016	1	1	1	MER41E
9	88509827	88515668	1	1	1	MER41A
9	89138064	89138384	0	1	0	MER41A
9	92734234	92741408	1	1	0	MER41B
9	94351639	94353267	1	1	0	MER41B
9	94743146	94744749	1	1	1	MER41A
9	96101677	96102244	1	0	0	MER41A
9	96278364	96283923	1	1	1	MER41A
9	96285356	96286540	0	1	0	MER41A
9	96904907	96906150	1	1	0	MER41B
9	98850388	98853929	1	1	1	MER41B
9	99301165	99302838	1	1	0	MER41B
9	100266037	100266340	1	0	0	MER41A
9	100266629	100269168	1	1	1	MER41A;MER41C
9	110587489	110593754	1	1	1	MER41D
9	124136395	124146584	1	1	1	MER41B
9	127513222	127513655	0	1	0	MER41A
9	129556378	129558778	1	1	0	MER41A
9	129595840	129598770	1	1	0	MER41A
X	997314	998610	1	0	1	MER41B
X	1274466	1274737	1	0	0	MER41C
X	1278136	1278796	1	0	0	MER41C
X	2889195	2893467	1	1	1	MER41A;MER41B
X	3184440	3185265	0	1	0	MER41A
X	4180846	4183378	1	1	0	MER41B
X	4483675	4485239	1	1	1	MER41B
X	4670182	4677068	1	1	1	MER41B
X	6783272	6783960	1	0	1	MER41C
X	6930399	6930799	1	0	0	MER41B
X	6986156	6986776	1	0	0	MER41A
X	7017032	7020074	1	1	0	MER41A;MER41C
X	7192004	7200865	1	1	1	MER41C
X	13101098	13104998	1	1	1	MER41B
X	18098660	18101116	1	1	1	MER41B
X	19829316	19830964	1	1	0	MER41B
X	37882289	37884588	1	1	1	MER41C
X	40841728	40847190	1	1	1	MER41A;MER41C
X	40972175	40972710	1	0	0	MER41A
X	43614604	43621349	1	1	1	MER41A
X	45008478	45011042	1	1	1	MER41B
X	46258185	46258862	1	0	0	MER41B
X	46777228	46779168	1	0	0	MER41B
X	49086114	49086362	1	0	0	MER41B
X	50720704	50723007	0	1	1	MER41A
X	68460157	68464833	1	1	1	MER41B
X	71629184	71635168	1	1	0	MER41A
X	77818270	77818480	0	0	1	MER41C
X	84729913	84740154	1	1	1	MER41A
X	88019808	88020987	1	1	1	MER41C
X	92133114	92137769	0	1	1	MER41A
X	93520731	93521000	1	0	0	MER41C
X	140922877	140924048	1	0	0	MER41B
X	144006107	144007882	1	1	0	MER41C
X	147308440	147309012	0	1	0	MER41C
X	149002864	149003641	0	1	0	MER41B

## Sheet: Description of Table S2
Table S2 Cell-type-specific activation of MER41-enhancers in different human trophoblast cells This table show the cell-type-specific activation of MER41-enhances in human TSC, STB and EVT cells. Enhancer activity is annotated based on the H3K27ac mark, with 1 and 0 stand for the presence and absence of H3K27ac marks, respectively. The MER41 subfamilies associated with each enhancer are also anno…
