# Supplementary material for: Regulation of endogenous retrovirus–derived regulatory elements by GATA2/3 and MSX2 in human trophoblast stem cells
Source: HighWire-hosted journal article supplement (doi:10.1101/gr.277150.122), 2023-02-01
Supplement: Supplemental_Table_S3.xlsx [file Supplemental_Table_S3.xlsx]

## Sheet: Table S3
Chrom	Start	End	MER41 subfamily	Binding status of different TFs on the MER41-enhancers in human TSC
				GATA2	GATA3	MSX2	TFAP2A	TFAP2C	ARID1A	SMARCA4
1	8115235	8129265	MER41A	1	1	1	1	1	1	1
1	8899065	8900100	MER41B	0	0	0	0	0	0	0
1	8900480	8900960	MER41B	0	0	0	0	0	0	0
1	8912838	8913348	MER41A	0	0	0	0	0	0	0
1	9083974	9084420	MER41E	0	0	0	0	0	1	0
1	18414161	18417347	MER41B	1	1	0	0	1	1	1
1	18419542	18422191	MER41B	0	1	1	0	0	0	0
1	21401029	21402607	MER41B	0	0	0	0	0	1	0
1	23596824	23597339	MER41B	0	0	0	0	0	0	0
1	26481448	26485422	MER41A	0	1	1	0	0	0	0
1	26632947	26638182	MER41B	0	1	1	0	0	1	1
1	31138269	31140272	MER41A	0	1	1	0	0	1	1
1	31562037	31564220	MER41B	1	1	1	1	0	1	1
1	37907250	37908703	MER41A	0	1	1	0	0	1	1
1	55231733	55240882	MER41B	1	1	1	1	1	1	1
1	61963017	61977836	MER41A	1	1	1	0	0	1	1
1	65530848	65531077	MER41A	0	0	0	0	0	1	0
1	70985926	70986197	MER41A	0	1	0	0	0	0	0
1	85223093	85225180	MER41E	1	1	1	1	1	1	1
1	94616737	94619244	MER41B	0	1	1	0	0	1	1
1	94858082	94859158	MER41A	0	0	0	0	0	0	0
1	107642205	107642593	MER41A	0	0	0	0	0	0	0
1	112831826	112833321	MER41C	0	1	1	0	0	1	1
1	116858157	116860491	MER41A	1	1	1	0	0	1	1
1	121080272	121081185	MER41B	0	1	0	0	0	0	0
1	143730775	143731155	MER41E	0	0	0	0	0	0	0
1	143867606	143867862	MER41B	0	0	0	0	0	0	0
1	144561999	144562320	MER41E	0	0	0	0	0	0	0
1	147718674	147719906	MER41B	0	0	0	0	0	0	0
1	147720428	147720658	MER41B	0	0	0	0	0	0	0
1	165673448	165673772	MER41B	0	0	1	0	0	1	1
1	165674165	165674430	MER41B	0	0	1	0	0	1	1
1	166692226	166693636	MER41A	0	1	1	0	0	0	1
1	168303715	168304098	MER41B	0	1	1	0	0	1	1
1	169496564	169498663	MER41C	1	1	1	0	1	1	1
1	175128311	175130797	MER41C	1	1	1	1	1	1	1
1	175266296	175270758	MER41C	1	1	1	1	1	1	1
1	178266043	178273903	MER41A	0	1	1	0	0	1	1
1	183621751	183623168	MER41A	0	0	0	0	0	0	0
1	186228256	186228623	MER41A	0	0	0	0	0	0	0
1	189537690	189539992	MER41C	0	1	1	0	0	1	1
1	202531613	202533481	MER41B	1	1	1	0	0	1	1
1	202863606	202863926	MER41D	0	0	0	0	0	0	0
1	202864182	202864466	MER41D	0	0	0	0	0	0	0
1	203599808	203602739	MER41A	0	1	0	1	0	0	0
1	203753124	203762224	MER41A;MER41B	0	1	1	0	0	1	1
1	203762556	203762935	MER41A	0	0	0	0	0	0	0
1	203779398	203779905	MER41B	0	0	0	0	0	0	0
1	209381313	209391172	MER41A	1	1	1	1	1	1	1
1	209408840	209417858	MER41A	0	1	1	0	0	1	1
1	210278663	210280301	MER41B	0	1	1	0	0	1	1
1	211524193	211525830	MER41B	0	1	1	0	0	1	0
1	213210162	213210783	MER41B	0	1	1	0	0	1	0
1	215582466	215584877	MER41B	1	1	1	0	0	1	1
1	224273102	224273807	MER41B	0	0	0	0	0	0	0
1	228448828	228449106	MER41B	0	0	1	0	0	1	0
1	228684526	228685554	MER41A	0	0	0	0	0	0	0
1	229447374	229448649	MER41B	0	0	0	0	0	0	0
1	234492431	234496335	MER41A	0	1	1	0	0	1	1
1	238061942	238062180	MER41G	0	0	0	0	0	0	0
1	239235161	239235787	MER41A	0	1	0	0	0	0	0
1	241696251	241698818	MER41B	0	1	1	0	0	1	1
1	244815980	244822978	MER41A	1	1	1	1	0	1	1
10	3880217	3899919	MER41B	1	1	1	1	1	1	1
10	4450188	4454251	MER41B	1	1	1	1	0	1	1
10	6296310	6297874	MER41B	0	1	1	0	0	1	0
10	13538227	13539169	MER41A	0	1	1	0	0	1	0
10	14377922	14379040	MER41B	0	0	1	0	0	1	1
10	14408093	14408469	MER41A	0	0	0	0	0	0	0
10	14413547	14417363	MER41A	0	1	1	1	0	1	1
10	14778537	14778805	MER41C	0	0	0	0	0	0	0
10	16685304	16685631	MER41A	0	1	0	0	0	1	0
10	21282327	21282974	MER41A	0	1	0	0	0	0	1
10	21964771	21965446	MER41C	1	1	1	1	1	1	1
10	21965758	21966399	MER41C	1	1	1	0	0	1	1
10	23050418	23054102	MER41B	1	1	1	1	1	1	1
10	25109990	25110447	MER41B	0	1	0	0	0	0	0
10	25805286	25806916	MER41C	1	1	1	1	1	1	1
10	26247438	26249262	MER41A	0	0	0	0	0	0	0
10	27150830	27151342	MER41B	0	0	0	0	0	0	0
10	27199881	27200219	MER41A	0	0	0	0	0	1	1
10	30420990	30425796	MER41B	0	1	1	0	0	1	1
10	32252189	32254603	MER41A	1	1	0	1	0	1	0
10	49549575	49550727	MER41B	0	1	1	0	0	1	1
10	57784514	57787241	MER41B	1	1	1	0	0	1	1
10	57898993	57899283	MER41B	0	1	0	0	0	0	0
10	67277832	67281049	MER41B	0	1	0	0	0	0	0
10	68093638	68095235	MER41B	1	1	1	0	0	1	1
10	70981986	70987289	MER41B	1	1	1	0	1	1	1
10	80013904	80014826	MER41B	0	1	1	0	0	1	0
10	80967191	80968275	MER41A;MER41B	0	0	0	0	0	1	0
10	84492523	84498544	MER41B	1	1	1	0	0	1	1
10	93274113	93275316	MER41B	1	1	1	0	0	1	1
10	103179046	103179407	MER41B	0	0	0	0	0	0	0
10	103526037	103529749	MER41B	1	1	1	0	0	1	1
10	104251880	104252555	MER41C	1	1	1	1	1	1	1
10	106492647	106494540	MER41B	1	1	1	1	0	0	0
10	114829256	114830021	MER41B	0	1	0	0	0	1	1
10	115996413	115998430	MER41A	1	1	1	1	1	1	1
10	118957617	118964500	MER41A	0	1	1	1	1	1	1
10	119686263	119689838	MER41A	1	1	1	1	1	1	1
10	123781102	123782889	MER41B	1	1	1	1	1	1	1
11	349317	351939	MER41A	0	1	1	1	0	1	1
11	355105	356465	MER41A	0	0	0	0	0	0	1
11	6283958	6284187	MER41A	0	0	0	0	0	0	0
11	12041133	12045703	MER41B	0	0	1	0	0	1	1
11	27447473	27448778	MER41B	0	0	0	0	0	0	0
11	36023467	36027157	MER41B	0	1	1	0	0	1	0
11	42064697	42065186	MER41C	0	1	0	0	0	0	0
11	43952667	43953222	MER41B	0	1	0	0	0	1	1
11	47859448	47862644	MER41C	0	1	1	0	0	1	1
11	57900517	57904946	MER41A	1	1	1	1	1	1	1
11	59547054	59548415	MER41B	0	1	0	0	0	0	0
11	59733792	59734239	MER41B	0	1	0	0	0	1	0
11	64414486	64415406	MER41A	0	0	0	0	0	0	0
11	64540389	64544485	MER41D	0	0	1	0	0	1	1
11	68275078	68275740	MER41E	0	0	0	0	0	0	0
11	75184648	75185834	MER41C	0	0	1	1	1	1	1
11	77752021	77752914	MER41A	1	1	0	0	0	0	0
11	87054119	87057255	MER41C	1	1	1	1	1	1	1
11	104748050	104749254	MER41A	0	1	1	0	0	1	0
11	107881599	107881889	MER41A	0	1	1	0	0	1	0
11	108518330	108519573	MER41A	0	1	0	0	0	0	0
11	110336408	110339364	MER41B	1	1	1	0	0	1	1
11	112250311	112251819	MER41D	0	0	1	0	0	1	1
11	119201634	119203798	MER41A	0	1	1	0	1	1	1
11	123215092	123219912	MER41B	0	1	1	0	0	1	1
11	129074275	129079697	MER41B	0	1	1	1	1	1	1
12	512865	513486	MER41A	0	1	1	0	0	1	1
12	7824144	7828448	MER41A	0	0	1	0	0	1	1
12	11622374	11624266	MER41A	1	1	1	0	0	1	1
12	14924710	14925199	MER41A	0	0	0	0	0	0	0
12	15949898	15950846	MER41A	0	0	0	0	0	0	0
12	17536955	17537358	MER41C	1	1	0	1	1	1	1
12	18752860	18753673	MER41B	0	0	0	0	0	0	0
12	19426052	19438212	MER41B	1	1	1	0	0	1	1
12	24848369	24868208	MER41B	1	1	1	1	1	1	1
12	24889260	24891553	MER41B	0	1	0	0	0	0	0
12	24969247	24972634	MER41B;MER41D	0	1	0	0	0	1	0
12	26748060	26754795	MER41A	1	1	1	1	0	1	1
12	28000335	28001124	MER41A	0	0	1	0	0	1	1
12	31650353	31651101	MER41A	0	1	1	1	0	1	1
12	32687899	32688458	MER41B	0	0	0	0	0	0	0
12	32942452	32947885	MER41B	1	1	1	1	0	1	1
12	33010573	33013698	MER41B	1	1	1	1	1	1	1
12	38892989	38893803	MER41A	0	0	0	0	0	0	0
12	39121227	39127496	MER41B	1	1	1	1	1	1	1
12	46475246	46476629	MER41A	0	0	1	0	0	1	1
12	48881827	48883102	MER41D	0	0	1	0	0	1	0
12	58411571	58415343	MER41B	1	1	1	1	0	1	1
12	80210117	80217996	MER41B	1	1	1	1	1	1	1
12	87439217	87441905	MER41C	1	1	1	1	0	1	1
12	88143514	88143934	MER41B	0	0	0	0	0	0	0
12	93896677	93901050	MER41E	0	1	1	0	0	1	1
12	98340629	98347396	MER41A;MER41B	1	1	1	1	1	1	1
12	108931524	108936138	MER41A	1	1	1	0	0	1	1
12	113581855	113584201	MER41A	0	0	0	0	0	0	0
12	118307937	118308780	MER41A	0	0	0	0	0	0	0
12	122462365	122471869	MER41A	1	1	1	0	0	1	1
13	24631166	24631516	MER41A	0	0	0	0	0	0	0
13	25114284	25117875	MER41C	1	1	1	1	1	1	1
13	31097725	31098966	MER41A	0	1	0	0	0	0	0
13	34621611	34623824	MER41A	1	1	1	0	0	1	1
13	45517190	45534575	MER41C	1	1	1	1	1	1	1
13	49950264	49956347	MER41A	0	1	1	0	0	1	1
13	63187312	63187643	MER41B	0	1	0	0	0	1	0
13	66073634	66074169	MER41A	1	1	1	1	0	1	0
13	70320348	70320583	MER41B	0	0	0	0	0	0	0
13	77950772	77954059	MER41C	0	1	1	0	0	1	1
13	97189807	97197060	MER41B	1	1	1	1	1	1	1
13	110608635	110612092	MER41G	0	0	1	1	1	1	1
13	112637847	112638402	MER41C	0	1	1	0	0	1	1
13	113378966	113381479	MER41A	0	0	0	0	0	1	0
13	113389767	113392236	MER41A	0	0	0	0	0	1	0
14	20493070	20494149	MER41D	0	0	0	0	0	1	0
14	35958938	35959286	MER41B	0	0	1	0	0	0	0
14	43789915	43791609	MER41A	0	0	0	0	0	0	0
14	50333177	50333461	MER41B	0	1	1	0	0	1	1
14	50938248	50939022	MER41B	0	0	0	0	0	0	0
14	61125172	61125438	MER41A	0	0	0	0	0	0	0
14	64638797	64643176	MER41A	1	1	1	1	1	1	1
14	64643522	64648242	MER41A	1	1	1	1	1	1	1
14	65368135	65370505	MER41B	0	1	1	0	0	0	0
14	67268122	67270705	MER41B	0	1	1	0	0	0	0
14	71130826	71131611	MER41B	0	1	1	0	0	1	0
14	71288702	71291775	MER41B	0	1	1	0	0	0	0
14	72907415	72908144	MER41A	0	0	0	0	0	0	0
14	75599956	75600458	MER41B	0	0	0	0	0	0	0
14	84484642	84485129	MER41B	0	1	1	0	0	0	0
14	89439063	89444007	MER41A	1	1	1	1	1	1	1
14	91117452	91118489	MER41B	0	1	0	0	0	1	1
14	92562840	92567077	MER41B	1	1	1	1	1	1	1
14	94089089	94089451	MER41B	0	0	1	0	0	0	0
14	95678041	95681352	MER41B	1	1	1	0	0	0	0
14	96459165	96470301	MER41C;MER41D	1	1	1	1	1	1	1
14	101918622	101919430	MER41B	0	0	0	1	0	0	0
14	102533132	102534280	MER41A	0	1	0	0	0	0	0
14	102550266	102551169	MER41A	0	0	0	0	0	0	1
14	102551427	102553655	MER41A	0	0	0	0	0	0	1
15	31156767	31158904	MER41C	1	1	1	0	1	1	1
15	33083377	33085114	MER41B	0	1	1	0	0	1	1
15	35695506	35701848	MER41B	1	1	1	0	0	1	1
15	41138688	41139613	MER41B	0	1	0	0	0	1	0
15	41579991	41590863	MER41A	1	1	1	1	1	1	1
15	53769360	53769694	MER41B	0	0	0	0	0	0	0
15	56081685	56083344	MER41C	0	0	1	0	0	1	1
15	59386846	59387693	MER41C	0	1	1	0	0	1	1
15	63226432	63227688	MER41A	0	0	1	0	0	1	0
15	67920819	67921610	MER41B	0	1	1	0	0	1	1
15	89778866	89785900	MER41B	1	1	1	1	1	1	1
15	90321390	90322314	MER41A	0	0	0	0	0	0	0
15	90323051	90323326	MER41B	0	0	0	0	0	0	0
15	95871514	95875577	MER41B	0	1	1	0	0	1	1
16	4772669	4773394	MER41B	0	0	0	0	0	0	0
16	10324486	10325673	MER41A	0	1	1	0	0	1	1
16	10327545	10329658	MER41C	1	1	1	1	1	1	1
16	11799644	11800598	MER41G	0	1	0	0	0	0	0
16	12809336	12809690	MER41B	0	0	0	0	0	0	0
16	25037491	25046130	MER41B	0	0	1	0	1	1	1
16	25571159	25571601	MER41B	0	1	0	0	0	0	0
16	27363922	27367122	MER41A	0	0	0	0	0	0	0
16	53412877	53421470	MER41B	1	1	1	1	0	1	1
16	54583528	54584051	MER41C	0	1	0	0	0	1	0
16	57226800	57227346	MER41B	0	1	0	0	0	0	0
16	60632974	60637607	MER41A	1	1	1	1	0	1	1
16	62257994	62258239	MER41B	0	0	0	0	0	0	0
16	68991520	69001293	MER41B	1	1	1	0	0	1	1
16	69070251	69070558	MER41C	0	0	0	0	0	0	0
16	69070904	69074071	MER41C	0	1	1	1	1	1	1
16	69172691	69173260	MER41A	0	0	0	0	0	0	0
16	74280453	74280822	MER41C	1	1	0	0	0	1	1
16	75559063	75559366	MER41B	0	0	0	0	0	1	1
16	75559730	75560088	MER41B	0	0	0	0	0	0	0
16	77990664	77996507	MER41C	1	1	1	1	1	1	1
16	85013100	85017673	MER41E	0	0	1	0	0	1	1
16	85018109	85019301	MER41E	0	0	0	0	0	0	0
16	85971313	85971637	MER41A	0	0	0	0	0	0	0
17	4351827	4356364	MER41B	0	1	1	0	0	0	1
17	15561624	15561903	MER41A	0	0	0	0	0	0	0
17	19985114	19988384	MER41B	0	0	1	0	0	1	1
17	27476197	27478499	MER41A	0	0	0	0	0	0	0
17	28113224	28113480	MER41A	0	0	0	0	0	0	0
17	29344667	29345098	MER41D	0	1	1	0	0	1	1
17	34608939	34612492	MER41E	1	1	0	1	1	1	0
17	40604583	40609467	MER41C	1	1	1	1	0	1	1
17	42529288	42529991	MER41B	1	1	1	1	1	1	1
17	42531196	42531854	MER41B	1	1	1	1	1	1	1
17	43594420	43596559	MER41B	0	1	1	0	0	1	1
17	45044253	45049411	MER41B	0	1	1	0	0	1	1
17	57023955	57024280	MER41B	0	1	1	0	0	1	0
17	71340738	71341361	MER41A	1	1	1	0	0	1	1
17	71936607	71937010	MER41B	0	0	0	0	0	1	1
17	76555206	76556455	MER41A	0	1	0	0	0	0	1
17	76801567	76801929	MER41B	0	0	0	0	0	0	0
17	78986403	78987981	MER41A	0	0	0	0	0	0	0
17	79010864	79012692	MER41B	0	1	1	0	0	1	1
17	79016070	79017629	MER41B	1	1	1	1	1	1	1
17	79017858	79018679	MER41B	0	1	1	0	0	1	1
17	82338459	82339685	MER41G	0	0	0	0	0	1	0
18	405284	406561	MER41A	1	1	1	0	0	1	1
18	11941398	11943385	MER41A	0	0	1	0	0	1	0
18	23281320	23286611	MER41B	0	1	1	1	1	1	1
18	43068608	43068913	MER41C	0	1	1	1	0	1	1
18	46158399	46161073	MER41B	0	1	1	1	1	1	1
18	48961652	48961884	MER41A	0	0	0	0	0	0	0
18	49311896	49315253	MER41A	1	1	1	0	0	1	1
18	50088678	50096489	MER41B	1	1	1	0	0	1	1
18	57210069	57211132	MER41B	1	1	1	1	0	1	1
18	62863949	62864447	MER41B	0	0	1	0	0	1	1
18	68437777	68439641	MER41B	1	1	1	0	0	1	1
18	70274980	70282243	MER41B	0	1	1	1	1	1	1
19	2167873	2173791	MER41D	0	1	1	0	0	1	1
19	5856586	5860725	MER41A	0	1	1	0	0	1	1
19	8158905	8164820	MER41A	0	1	0	0	0	0	0
19	9073493	9077953	MER41A	0	0	0	1	0	1	0
19	16475339	16477633	MER41A	0	1	1	0	0	1	1
19	16817788	16827127	MER41A;MER41B	0	1	1	1	1	1	1
19	17286012	17288278	MER41A	0	1	1	0	0	1	1
19	18408717	18409139	MER41B	0	0	0	0	0	0	0
19	21021981	21025344	MER41A	0	0	1	0	0	1	1
19	21365978	21366744	MER41A	0	0	0	0	0	1	0
19	23699965	23700483	MER41C	0	0	0	0	0	0	0
19	35165692	35166139	MER41B	0	0	0	0	0	0	0
19	36745508	36745978	MER41A	0	0	0	0	0	0	0
19	39250552	39251729	MER41C	0	1	1	0	0	1	1
19	42486414	42490622	MER41B	1	1	1	0	0	1	1
19	42970022	42973391	MER41A;MER41C	0	0	1	0	0	1	1
19	44591910	44593316	MER41B	1	1	1	1	1	1	1
19	50174802	50175313	MER41D	0	0	0	0	0	0	0
19	53580389	53582182	MER41C	1	1	1	0	1	1	1
19	57798187	57799224	MER41B	0	0	0	0	0	1	0
2	1753155	1753611	MER41B	0	0	1	0	0	0	0
2	1772038	1778624	MER41B	0	1	1	1	1	1	1
2	9167879	9168346	MER41B	0	1	1	1	1	1	1
2	9169420	9169908	MER41B	0	1	1	0	0	0	1
2	11120056	11124658	MER41A	0	0	1	0	0	1	1
2	20369038	20370227	MER41D	0	0	0	0	0	0	0
2	21749689	21749987	MER41B	0	0	0	0	0	0	0
2	26752642	26762971	MER41A;MER41B	1	1	1	1	1	1	1
2	31281500	31285489	MER41A	1	1	1	0	0	1	0
2	32931996	32934655	MER41B	1	1	1	1	1	1	1
2	38776595	38777050	MER41C	0	0	1	0	0	1	1
2	39467684	39470644	MER41A	0	1	1	1	1	1	1
2	40400715	40403076	MER41B	0	1	1	0	0	1	0
2	44105611	44112102	MER41A	1	1	1	0	0	1	1
2	47727006	47729538	MER41A	1	1	1	1	1	1	1
2	48050114	48052776	MER41A	1	1	1	1	1	1	1
2	61639217	61641344	MER41B	0	1	1	0	0	1	1
2	69449073	69452079	MER41A	1	1	1	1	1	1	1
2	79779212	79782591	MER41A	1	1	1	1	1	1	0
2	98046259	98046583	MER41A	0	1	0	0	0	0	0
2	98049064	98060595	MER41A	0	1	1	1	1	1	1
2	99606033	99613157	MER41A	0	1	1	0	0	1	1
2	102784596	102784876	MER41A	0	1	0	0	0	0	0
2	105256105	105257109	MER41A	0	1	1	0	0	1	1
2	105467423	105468091	MER41B	0	1	1	0	0	1	1
2	105468363	105468699	MER41B	0	0	0	0	0	0	0
2	109643475	109649005	MER41A	1	1	1	1	1	1	1
2	112789777	112796889	MER41B	0	1	1	1	1	1	1
2	129727473	129728416	MER41B	0	0	0	0	0	0	0
2	134179697	134181282	MER41B	0	0	1	0	0	0	0
2	134590137	134590857	MER41A	0	1	0	0	0	0	0
2	134591169	134591408	MER41A	0	0	0	0	0	0	0
2	134910938	134912431	MER41B	1	1	1	0	0	1	1
2	142978970	142980935	MER41B	1	1	1	0	0	1	1
2	163624514	163629351	MER41B	1	1	1	1	0	1	1
2	163849605	163851612	MER41B	1	1	1	0	0	1	1
2	165581050	165588139	MER41C	1	1	1	1	1	1	1
2	172836030	172841531	MER41A	0	1	1	0	0	0	0
2	191306936	191307285	MER41B	0	0	0	0	0	0	0
2	191307581	191308529	MER41B	0	1	0	0	0	0	0
2	191320765	191326572	MER41B	1	1	1	1	1	1	1
2	191599697	191600160	MER41A	0	1	0	0	0	0	0
2	196535908	196540693	MER41C	1	1	1	1	1	1	1
2	202361861	202362103	MER41A	0	1	1	0	0	1	1
2	207772047	207772628	MER41B	0	1	0	0	0	0	0
2	207789240	207799150	MER41B	0	1	1	1	1	1	1
2	207804041	207808721	MER41E	0	0	0	0	0	1	1
2	215617477	215617840	MER41A	0	1	1	0	0	1	1
2	215618263	215619034	MER41A	0	1	1	0	0	1	1
2	222898074	222903424	MER41C	1	1	1	1	1	1	1
2	226472879	226485544	MER41A	1	1	1	1	1	1	1
2	231014202	231017742	MER41C	0	1	1	1	1	1	1
2	234362008	234365775	MER41B	1	1	1	1	1	1	1
2	235443440	235445692	MER41A	1	1	1	0	0	1	1
20	4214867	4219161	MER41B	0	1	1	1	0	1	1
20	4309778	4311686	MER41A	0	1	1	0	0	1	0
20	7691230	7693140	MER41B	1	1	1	0	0	1	1
20	12286524	12288801	MER41C	1	1	1	1	0	1	1
20	24131108	24131361	MER41B	0	1	0	0	0	1	1
20	34323177	34323492	MER41B	0	0	0	0	0	0	0
20	37559277	37559522	MER41B	0	0	0	0	0	0	0
20	44677539	44680086	MER41D	1	1	1	1	1	1	1
20	45331161	45331650	MER41B	0	1	0	0	0	0	0
20	46635766	46638580	MER41B	0	1	1	1	1	1	1
20	48155645	48158545	MER41B	0	1	1	0	0	1	1
20	48278039	48281631	MER41C	1	1	1	0	1	1	1
20	49673974	49683204	MER41B	0	1	1	0	0	1	1
20	49758695	49766303	MER41A;MER41B	1	1	1	1	1	1	1
20	50437099	50442369	MER41A	0	1	1	0	0	1	1
20	50991046	50993194	MER41D	0	0	1	1	1	1	1
20	51091621	51094549	MER41B	1	1	1	1	0	1	1
20	51777741	51778787	MER41A	0	1	0	0	0	0	0
20	56829697	56834889	MER41A	1	1	1	1	1	1	1
20	63231748	63234260	MER41A	0	1	1	0	0	1	1
21	16386995	16390926	MER41C	1	1	1	1	1	1	1
21	17688487	17690276	MER41B	0	1	1	1	0	1	0
21	17690589	17691230	MER41B	0	0	0	0	0	1	0
21	26714366	26716057	MER41A	1	1	1	0	0	1	1
21	33234639	33235027	MER41B	0	0	0	0	0	0	0
21	42929013	42947457	MER41A	1	1	1	1	1	1	1
21	44845494	44846832	MER41C	0	0	1	0	0	1	1
21	45010381	45014565	MER41E	0	1	1	1	1	1	1
22	20840211	20843529	MER41A	0	1	1	0	0	1	1
22	24199412	24209399	MER41A	1	1	1	1	1	1	1
22	28543507	28545572	MER41B	1	1	1	0	0	1	1
22	31798209	31798769	MER41C	0	0	0	0	0	0	0
22	31799112	31801601	MER41C	0	1	1	0	0	1	1
22	35668293	35668747	MER41A	0	0	0	0	0	0	0
22	36425930	36427526	MER41A	0	1	1	0	1	1	0
22	36976760	36978110	MER41B	0	0	0	0	0	0	0
22	42697297	42701489	MER41A	0	0	0	0	0	0	0
22	42734678	42746138	MER41A	0	1	1	1	1	1	1
22	43125357	43129250	MER41B	0	0	1	0	0	1	1
22	44746397	44749115	MER41B	1	1	1	0	0	1	1
3	3706055	3710596	MER41A;MER41C	0	1	1	1	1	1	1
3	4059904	4072084	MER41B	1	1	1	1	0	1	1
3	13938586	13939135	MER41C	0	0	1	0	0	1	1
3	13939470	13940652	MER41C	0	1	1	0	0	1	1
3	13947706	13955878	MER41C	1	1	1	1	1	1	1
3	15404170	15404645	MER41A	0	0	0	0	0	0	0
3	31311587	31313585	MER41B	1	1	1	0	1	1	1
3	34568172	34570368	MER41B	1	1	1	1	1	1	1
3	41966790	41967470	MER41B	0	0	0	0	0	0	0
3	45061706	45062677	MER41A;MER41B	0	0	0	0	0	0	0
3	45063005	45067097	MER41B	1	1	1	0	0	1	1
3	46385497	46387098	MER41E	0	1	0	0	0	0	0
3	53902888	53904197	MER41C	1	1	1	1	1	1	1
3	54981208	54984982	MER41A	1	1	1	1	1	1	1
3	72027119	72030311	MER41A	0	1	1	0	0	1	1
3	80731514	80736995	MER41B	1	1	1	0	0	1	1
3	112394985	112396015	MER41C	0	1	1	0	0	1	0
3	117032845	117033798	MER41A	0	1	1	0	0	1	1
3	117034065	117035714	MER41A	0	1	1	0	0	1	1
3	118530851	118531123	MER41B	0	0	0	0	0	0	0
3	120099019	120102058	MER41A	1	1	1	0	0	1	1
3	120466123	120474307	MER41B	1	1	1	1	1	1	1
3	127731652	127733969	MER41A	0	0	0	0	1	0	0
3	129698659	129700579	MER41B	0	1	0	0	0	0	0
3	138845336	138848500	MER41A	1	1	1	0	1	1	1
3	146502713	146505711	MER41B	0	1	1	0	0	1	1
3	151973670	151973898	MER41C	1	1	0	0	0	1	1
3	161140271	161140522	MER41C	0	0	0	0	0	0	0
3	165456740	165457036	MER41C	0	0	0	0	0	1	1
3	165457333	165458010	MER41C	0	1	1	0	0	1	1
3	166455973	166456452	MER41B	1	1	1	0	0	1	1
4	6313439	6315088	MER41C	1	1	1	1	1	1	1
4	8242081	8243423	MER41B	0	1	1	0	0	1	1
4	10980773	10981476	MER41C	0	0	1	0	0	1	1
4	10981811	10983909	MER41C	1	1	1	1	1	1	1
4	12612556	12617543	MER41A	1	1	1	0	0	1	1
4	15568054	15569790	MER41C	1	1	1	0	1	1	1
4	18644544	18645330	MER41C	0	1	1	0	0	1	1
4	18870972	18872079	MER41A	0	0	0	0	0	0	0
4	18872312	18872950	MER41A	0	1	0	0	0	0	0
4	25725598	25725967	MER41B	0	1	1	0	0	1	1
4	37670118	37671324	MER41B	1	1	1	0	0	1	1
4	37671577	37672949	MER41B	0	1	0	0	0	0	0
4	40266635	40267111	MER41A	0	0	0	0	0	0	0
4	48953502	48957863	MER41A;MER41C	0	1	1	0	0	1	1
4	61554192	61557834	MER41A	1	1	1	0	0	1	1
4	67720989	67722530	MER41B	0	1	1	0	0	1	1
4	71881792	71882273	MER41C	1	1	1	1	0	1	1
4	74092736	74094072	MER41C	0	1	1	1	0	1	1
4	88608335	88613962	MER41A	0	0	1	0	0	1	1
4	98816041	98819404	MER41A	1	1	1	0	0	1	1
4	99165531	99166356	MER41B	0	0	1	0	0	0	0
4	106302143	106306307	MER41A	1	1	1	0	0	0	0
4	107333867	107334374	MER41C	0	0	0	0	0	0	0
4	107350397	107352798	MER41C	1	1	1	1	1	1	1
4	109607359	109612138	MER41A	0	1	1	0	0	1	1
4	110105968	110106631	MER41B	0	0	1	0	0	1	1
4	112753672	112753915	MER41A	0	0	0	0	0	1	0
4	118358950	118359322	MER41B	0	0	0	0	0	0	0
4	121270888	121272577	MER41D	0	0	1	0	0	1	1
4	125040701	125041177	MER41A	1	1	0	0	0	0	0
4	128319360	128328259	MER41B	1	1	1	1	0	1	1
4	135174060	135174565	MER41C	0	0	0	0	0	1	0
4	138974037	138985358	MER41C	1	1	1	1	1	1	1
4	147708811	147710386	MER41B	0	1	1	0	0	1	1
4	153537337	153537593	MER41A	0	0	0	0	0	1	0
4	156346273	156348972	MER41B	0	1	1	1	1	1	1
4	163385076	163386115	MER41B	0	1	1	0	0	1	1
4	168766112	168767419	MER41A	0	0	0	0	0	0	0
4	172899014	172899869	MER41A	0	1	1	0	0	1	1
4	175443458	175446351	MER41C	1	1	1	1	1	1	1
4	175450817	175453762	MER41C	1	1	1	1	1	1	1
4	182261774	182265077	MER41A	0	0	0	0	0	0	1
4	182267944	182268610	MER41A	0	0	0	0	0	0	0
5	34520735	34525238	MER41A	1	1	1	0	0	1	1
5	41523960	41529973	MER41B	1	1	1	1	1	1	1
5	54569057	54573803	MER41C	0	0	1	0	0	1	1
5	54820155	54822956	MER41B	1	1	1	1	1	1	1
5	57731994	57737510	MER41A	1	1	1	1	0	1	1
5	62619051	62627403	MER41B	0	1	1	1	0	1	1
5	65098722	65101712	MER41D	0	1	1	0	0	0	1
5	73989616	73990086	MER41A	0	1	0	0	0	1	0
5	74591810	74592063	MER41A	0	0	0	0	0	0	0
5	76793219	76794016	MER41A	0	1	0	0	0	0	0
5	95727517	95728732	MER41B	1	1	1	0	0	1	1
5	97908572	97909615	MER41B	0	0	1	0	0	1	1
5	100821186	100824424	MER41A	1	1	1	0	0	1	1
5	103056575	103057857	MER41B	1	1	0	0	0	1	0
5	108622763	108623213	MER41E	0	0	0	0	0	0	0
5	115929168	115932285	MER41A	0	0	0	0	0	1	0
5	116858351	116860946	MER41A	1	1	1	0	0	1	0
5	122609777	122613751	MER41C	1	1	1	0	0	1	1
5	126514544	126515278	MER41B	0	1	1	0	0	1	1
5	128545957	128547922	MER41B	1	1	1	0	0	1	1
5	132969219	132973307	MER41B	1	1	1	0	0	1	1
5	138843452	138846096	MER41B	0	0	0	0	0	0	0
5	142443139	142447786	MER41B	0	0	1	0	0	1	1
5	149914137	149920114	MER41E	1	1	1	1	1	1	1
5	153078010	153081523	MER41B	1	1	1	0	0	1	1
5	160157795	160161804	MER41B	0	1	1	1	1	1	1
5	160166514	160168263	MER41B	1	1	1	0	0	0	0
5	172133357	172138447	MER41C	1	1	1	1	1	1	1
5	172313664	172316812	MER41A	1	1	1	0	1	1	1
6	3337549	3340469	MER41A	0	1	1	0	0	0	0
6	5540211	5543678	MER41B	0	1	1	0	0	1	1
6	7679140	7681993	MER41B	0	1	1	0	0	1	1
6	13951780	13954896	MER41C	0	0	1	0	0	1	1
6	15207350	15208393	MER41A	0	0	0	1	0	1	1
6	15896810	15899002	MER41B	0	1	1	0	0	1	1
6	21275316	21284459	MER41C	1	1	1	1	1	1	1
6	21399073	21399702	MER41B	0	0	1	0	0	1	0
6	27136000	27136882	MER41B	0	0	0	0	0	0	0
6	27567589	27569850	MER41B	1	1	1	1	0	1	1
6	27882000	27886351	MER41A	0	0	1	0	0	1	1
6	27887833	27888261	MER41E	0	0	0	0	0	0	0
6	30853855	30855254	MER41B	0	1	1	0	0	1	1
6	33377864	33378117	MER41A	0	0	0	0	0	0	0
6	56740071	56740466	MER41A	0	0	0	0	0	0	0
6	73563830	73569546	MER41B	0	0	1	0	0	1	1
6	77093556	77094006	MER41D	0	0	0	0	0	0	0
6	107962718	107967228	MER41B	1	1	1	0	0	1	1
6	109422265	109425281	MER41A	0	1	1	1	1	1	1
6	110507311	110512521	MER41B	1	1	1	1	1	1	1
6	110819896	110821259	MER41B	0	0	1	0	0	1	1
6	119036743	119042617	MER41A	1	1	1	1	0	1	1
6	120354789	120355162	MER41B	0	0	0	0	0	0	0
6	132003175	132004704	MER41A	0	1	0	0	0	0	0
6	142025011	142027823	MER41C	1	1	1	1	1	1	1
6	143739008	143740284	MER41A	0	1	1	0	0	1	0
6	148443940	148444881	MER41B	0	0	0	0	0	1	1
6	152311875	152316714	MER41C	1	1	1	0	0	1	1
6	158703724	158713016	MER41A	1	1	1	1	1	1	1
6	167480972	167481551	MER41B	0	1	0	0	0	1	1
7	3258875	3261562	MER41A	1	1	0	0	0	1	1
7	3262425	3262861	MER41A	0	0	0	0	0	0	0
7	3263488	3263718	MER41A	0	0	0	0	0	0	0
7	7353356	7355799	MER41C	1	1	1	1	1	1	1
7	7794052	7801130	MER41B	1	1	1	1	1	1	1
7	19077357	19082086	MER41B	1	1	1	1	0	1	1
7	22569470	22588147	MER41D	1	1	1	1	1	1	1
7	32678759	32682156	MER41B	0	1	1	0	0	1	1
7	35014240	35016328	MER41B	0	1	1	0	0	1	1
7	41558128	41561559	MER41C	0	1	1	0	0	1	1
7	41750278	41750966	MER41B	0	0	1	0	0	1	0
7	41751258	41753019	MER41C	0	1	1	0	1	1	1
7	41753263	41754076	MER41A	0	1	1	0	0	1	1
7	41754303	41755161	MER41A	0	1	1	0	0	1	1
7	51233162	51243072	MER41B	1	1	1	1	1	1	1
7	51620842	51623145	MER41C	1	1	1	1	1	1	1
7	65781589	65782940	MER41A	0	0	1	0	0	0	0
7	67358772	67361341	MER41B	1	1	1	1	1	1	1
7	74132575	74137050	MER41B	0	1	1	0	0	1	1
7	74141157	74143123	MER41B	0	0	1	0	0	1	1
7	74159107	74160388	MER41B	0	1	1	0	0	0	0
7	80480190	80481742	MER41A	1	1	1	1	1	1	1
7	82696149	82696525	MER41B	0	0	0	0	0	0	0
7	87358060	87358334	MER41D	0	0	0	0	0	0	0
7	100915841	100918939	MER41B	1	1	1	1	0	1	1
7	100919328	100919897	MER41A	0	0	0	0	0	0	0
7	106459901	106461856	MER41B	1	1	1	1	1	1	1
7	111679311	111679767	MER41B	0	0	0	0	0	0	0
7	121503528	121506577	MER41A	0	1	1	1	1	1	1
7	128901124	128901971	MER41A	0	0	0	0	0	0	0
7	140565641	140565969	MER41A	0	0	0	0	0	0	1
7	149133006	149133397	MER41A	0	1	0	0	0	0	0
7	157306363	157312175	MER41B	0	1	1	0	0	1	1
8	569378	575918	MER41C	1	1	1	1	1	1	1
8	8941164	8947830	MER41B	1	1	1	0	0	1	1
8	26147844	26153661	MER41E	0	1	1	1	1	1	1
8	36221968	36222261	MER41A	0	0	0	0	0	0	0
8	37880808	37887588	MER41C	0	1	1	1	1	1	1
8	38865592	38867770	MER41A	0	1	0	0	0	1	1
8	39232515	39235257	MER41B	1	1	1	0	1	1	1
8	41184068	41187099	MER41B	0	0	1	0	0	1	0
8	41187408	41187674	MER41B	0	0	0	0	0	0	0
8	54104184	54108156	MER41A;MER41B	0	1	1	0	0	1	1
8	54151534	54151985	MER41B	0	0	0	0	0	0	0
8	55212180	55213131	MER41C	0	1	0	0	0	0	0
8	58297046	58301400	MER41B	1	1	1	1	1	1	0
8	74601375	74602047	MER41B	0	0	1	0	0	1	0
8	74602342	74602646	MER41B	0	0	1	0	0	0	0
8	78341511	78341827	MER41E	0	0	0	0	0	0	0
8	78676716	78678849	MER41A	0	1	0	0	0	0	0
8	84852587	84852964	MER41C	1	1	1	1	0	1	1
8	89796905	89805508	MER41A;MER41B	0	1	1	0	0	1	1
8	90580225	90580571	MER41E	0	0	0	0	0	0	0
8	93222565	93222991	MER41B	0	0	0	0	0	1	1
8	93872568	93877035	MER41B	1	1	1	1	1	1	1
8	97801855	97802178	MER41B	0	0	0	0	0	0	0
8	101354771	101358733	MER41A	0	1	1	0	0	1	1
8	101461838	101462136	MER41A	0	0	0	0	0	0	0
8	101462883	101463131	MER41A	0	1	0	0	0	0	0
8	102091815	102092541	MER41A	0	0	0	0	0	1	0
8	143218409	143224524	MER41C	0	0	1	0	0	1	1
9	33099092	33100905	MER41B	0	0	1	0	0	1	1
9	34644504	34644769	MER41A	0	0	1	0	0	1	1
9	36385314	36387323	MER41A	0	1	1	0	0	1	1
9	36557874	36562156	MER41A;MER41B	1	1	1	1	1	1	1
9	76351968	76352717	MER41A	0	0	0	0	0	0	0
9	77890422	77894014	MER41B	0	0	1	0	0	1	1
9	82811188	82811650	MER41A	0	1	1	0	0	1	1
9	86893973	86895671	MER41A	0	1	0	0	0	0	0
9	87337289	87338606	MER41D	0	1	1	1	1	1	1
9	87466125	87468361	MER41B	1	1	1	0	0	1	1
9	88196181	88199016	MER41E	0	1	1	0	1	1	1
9	88510859	88515607	MER41A	1	1	1	1	1	1	1
9	92734234	92737259	MER41B	0	1	1	1	1	1	1
9	94351773	94352231	MER41B	0	0	0	0	0	1	0
9	94743146	94744749	MER41A	0	1	1	0	0	1	1
9	96101677	96102244	MER41A	0	1	1	0	0	1	1
9	96278441	96282767	MER41A	1	1	1	1	0	1	1
9	96905567	96905882	MER41B	0	0	0	0	0	0	0
9	98850388	98853158	MER41B	0	1	1	0	0	1	1
9	99301165	99302650	MER41B	0	1	1	1	1	1	1
9	100266037	100266340	MER41A	0	0	0	0	0	1	1
9	100266629	100268933	MER41A;MER41C	1	1	1	1	1	1	1
9	110591297	110591583	MER41D	1	1	1	1	0	1	1
9	124141069	124145501	MER41B	0	1	1	0	0	1	1
9	129556378	129558778	MER41A	0	0	0	1	1	1	1
9	129595840	129598770	MER41A	0	0	1	0	0	1	1
X	997314	998610	MER41B	0	0	1	0	0	1	1
X	1274466	1274737	MER41C	0	0	0	0	0	0	0
X	1278136	1278796	MER41C	0	0	0	0	0	0	0
X	2889195	2893467	MER41A;MER41B	1	1	1	1	0	1	1
X	4180846	4183378	MER41B	1	1	1	0	0	1	1
X	4483675	4485239	MER41B	1	1	1	0	0	1	1
X	4670182	4677068	MER41B	1	1	1	0	0	1	1
X	6783272	6783960	MER41C	0	0	0	0	0	1	0
X	6930399	6930799	MER41B	0	0	0	0	0	0	0
X	6986156	6986776	MER41A	0	0	0	0	0	0	0
X	7017032	7020074	MER41A;MER41C	1	1	1	1	0	1	1
X	7192937	7200865	MER41C	1	1	1	1	1	1	1
X	13101098	13104762	MER41B	0	1	1	0	0	1	1
X	18098660	18101116	MER41B	1	1	1	1	0	1	1
X	19829477	19829953	MER41B	0	0	1	0	0	1	1
X	37882820	37884233	MER41C	0	1	0	0	0	1	0
X	40842983	40847190	MER41A;MER41C	0	1	1	0	0	1	1
X	40972175	40972710	MER41A	1	1	1	0	0	1	1
X	43616434	43618207	MER41A	0	1	1	0	0	1	1
X	45009085	45009369	MER41B	0	0	0	0	0	0	0
X	46258185	46258862	MER41B	0	1	0	0	0	0	0
X	46777228	46779168	MER41B	0	1	1	0	0	1	1
X	49086114	49086362	MER41B	0	0	0	0	0	0	1
X	68460800	68464031	MER41B	0	1	1	0	0	1	1
X	71631215	71631722	MER41A	0	0	1	0	0	1	1
X	84729960	84739896	MER41A	1	1	1	1	1	1	1
X	93520731	93521000	MER41C	0	1	0	0	0	0	0
X	140922877	140924048	MER41B	0	0	1	0	0	1	1
X	144006589	144007681	MER41C	0	1	0	0	0	0	0

## Sheet: Description of Table S3
Table S3 Binding status of different TFs on MER41-enhancers in human TSCs This table show the binding status of different TFs (ie GATA2, GATA3, MSX2, TFAP2A, TFAP2C, ARID1A, SMARCA) on the MER41-enhances in human TSCs. The binding status was annotated based on the overlapping with TF peaks by ChIP-seq, with 1 and 0 stand for the presence and absence of TF binding, respectively. The MER41 subfamil…
