# Supplementary material for: Regulation of endogenous retrovirus–derived regulatory elements by GATA2/3 and MSX2 in human trophoblast stem cells
Source: HighWire-hosted journal article supplement (doi:10.1101/gr.277150.122), 2023-02-01
Supplement: Supplemental_Table_S4.xlsx [file Supplemental_Table_S4.xlsx]

## Sheet: Table S4A - const-active
Chrom	Start	End	MER41 subfamily
1	8115455	8124589	MER41A
1	8894941	8901043	MER41B
1	18413529	18417752	MER41B
1	18419190	18423342	MER41B
1	21401252	21401760	MER41B
1	21402092	21402650	MER41B
1	24543688	24544182	MER41C
1	24678929	24679258	MER41B
1	26480902	26484085	MER41A
1	26632939	26638114	MER41B
1	31138460	31139667	MER41A
1	31560843	31564897	MER41B
1	31588683	31590348	MER41A;MER41B
1	37902282	37903930	MER41A
1	37906773	37908705	MER41A
1	40910630	40911303	MER41C
1	42613313	42613621	MER41B
1	43135304	43136031	MER41A
1	55232434	55234482	MER41B
1	61965370	61968950	MER41A
1	70985305	70986819	MER41A
1	85223189	85227897	MER41E
1	94616714	94618186	MER41B
1	107641648	107646349	MER41A
1	112831397	112833500	MER41C
1	116858178	116860441	MER41A
1	121080133	121081110	MER41B
1	147716488	147717920	MER41B
1	147718447	147720087	MER41B
1	149775439	149775682	MER41B
1	155834815	155835087	MER41B
1	169496782	169498620	MER41C
1	175128521	175130617	MER41C
1	175266561	175271484	MER41C
1	178266136	178275400	MER41A
1	189537548	189539884	MER41C
1	198068530	198068775	MER41D
1	198069082	198069585	MER41D
1	202021855	202024480	MER41A
1	202531463	202533476	MER41B
1	203598061	203602646	MER41A
1	203754199	203761600	MER41A;MER41B
1	203779281	203779977	MER41B
1	209381679	209390980	MER41A
1	209408984	209413854	MER41A
1	211524270	211525830	MER41B
1	215581704	215585027	MER41B
1	223731807	223732274	MER41A
1	228685206	228685478	MER41A
1	230151630	230151952	MER41A
1	233108028	233108385	MER41A
1	233471390	233473778	MER41A
1	233734964	233737204	MER41B
1	234492290	234496966	MER41A
1	235386753	235388046	MER41A
1	235406571	235410506	MER41A
1	238061782	238062328	MER41G
1	240649584	240650431	MER41D
1	240650708	240651615	MER41D
1	241696704	241697819	MER41B
1	244818874	244823212	MER41A
10	3878902	3898207	MER41B
10	6295564	6298763	MER41B
10	13538128	13539043	MER41A
10	14377927	14378627	MER41B
10	14407344	14408489	MER41A
10	14415238	14417662	MER41A
10	23050029	23054653	MER41A;MER41B
10	25805490	25805855	MER41C
10	25806127	25806747	MER41C
10	27150683	27151997	MER41B
10	27199262	27200439	MER41A
10	30421996	30425718	MER41B
10	32251591	32254900	MER41A
10	57784755	57787526	MER41B
10	57897383	57899845	MER41B
10	68093031	68095789	MER41B
10	70981205	70986906	MER41B
10	80013754	80014728	MER41B
10	80966662	80968339	MER41A;MER41B
10	84491066	84498654	MER41B
10	84632599	84633124	MER41C
10	84633399	84633684	MER41C
10	114828996	114830926	MER41B
10	115996503	115998373	MER41A
10	118958157	118964417	MER41A
10	119686914	119689872	MER41A
10	123781381	123783546	MER41B
10	123942600	123942916	MER41B
11	355195	356458	MER41A
11	9597364	9597744	MER41D
11	12041417	12045483	MER41B
11	36025797	36027078	MER41B
11	42063911	42064398	MER41C
11	42064752	42065031	MER41C
11	47845363	47845693	MER41A
11	47859660	47862441	MER41C
11	57900397	57906814	MER41A
11	59546960	59548164	MER41B
11	59732845	59734460	MER41B
11	62013898	62014444	MER41B
11	64539195	64545952	MER41D
11	68136835	68137466	MER41B
11	70389509	70390993	MER41A
11	71865053	71865715	MER41A
11	75184700	75186542	MER41C
11	77047144	77047647	MER41B
11	87054581	87056734	MER41C
11	104748204	104748633	MER41A
11	107881346	107882687	MER41A
11	108518445	108519179	MER41A
11	110335347	110341034	MER41B
11	123214506	123219823	MER41B
11	129075100	129078358	MER41B
12	512643	515111	MER41A
12	627594	629870	MER41B
12	7824632	7828026	MER41A
12	11622272	11624225	MER41A
12	15950042	15950466	MER41A
12	17536341	17536649	MER41C
12	17536982	17539213	MER41C
12	19425402	19438257	MER41B
12	24858508	24866899	MER41B
12	24889793	24890799	MER41B
12	26750490	26753871	MER41A
12	32942206	32948337	MER41B
12	33011193	33013360	MER41B
12	38893304	38893586	MER41A
12	39121495	39125493	MER41B
12	46475815	46476314	MER41A
12	48881974	48882607	MER41D
12	58411637	58415049	MER41B
12	64361604	64363417	MER41A;MER41B
12	79546174	79550844	MER41A
12	80211420	80216260	MER41B
12	87439478	87441193	MER41C
12	93897453	93900441	MER41E
12	98341028	98347359	MER41A;MER41B
12	107109609	107110163	MER41B
12	108931095	108935382	MER41A
12	118306995	118310152	MER41A
12	122462472	122471857	MER41A
13	25114541	25116708	MER41C
13	33150211	33160755	MER41E
13	34622765	34623627	MER41A
13	42982446	42982683	MER41A
13	45526236	45528852	MER41C
13	49950055	49955978	MER41A
13	51637424	51639427	MER41C
13	63187162	63188621	MER41B
13	66073910	66074809	MER41A
13	77951356	77954119	MER41C
13	97189913	97196178	MER41B
13	110608386	110613263	MER41G
13	112638042	112638433	MER41C
13	113379338	113381674	MER41A
13	113390310	113390779	MER41A
13	113391079	113391365	MER41A
14	20492405	20495877	MER41D
14	23206694	23210964	MER41A
14	35958826	35959371	MER41B
14	43789926	43790865	MER41A
14	50333333	50333691	MER41B
14	50937455	50938581	MER41B
14	63436668	63438913	MER41B
14	64638839	64640793	MER41A
14	64643703	64647439	MER41A
14	65367709	65370362	MER41B
14	65430673	65433124	MER41A
14	67267987	67270552	MER41B
14	69697756	69698143	MER41B
14	71129883	71131090	MER41B
14	71289092	71291879	MER41B
14	72907324	72908092	MER41A
14	89437760	89438122	MER41A
14	89438882	89445627	MER41A
14	90476593	90477226	MER41A
14	91617809	91618839	MER41A
14	92561758	92574804	MER41B
14	94088631	94089363	MER41B
14	95677728	95681208	MER41B
14	96460270	96471114	MER41C;MER41D
14	101918637	101919784	MER41B
14	102550134	102551093	MER41A
14	102551427	102554117	MER41A
14	102860264	102861634	MER41B
15	33083188	33085208	MER41B
15	35695881	35701884	MER41B
15	41139292	41139561	MER41B
15	41140843	41142834	MER41B
15	41578479	41590296	MER41A
15	41592422	41595226	MER41B
15	47780645	47780889	MER41C
15	53767960	53769724	MER41B
15	56081100	56083376	MER41C
15	59386546	59388605	MER41C
15	63226670	63227752	MER41A
15	66361281	66368060	MER41B
15	67920120	67921626	MER41B
15	85157719	85158823	MER41A
15	89779205	89787330	MER41B
15	95871944	95876016	MER41B
16	2502883	2503792	MER41B
16	4772833	4774326	MER41B
16	10301921	10302361	MER41B
16	10327342	10329510	MER41C
16	10502488	10502866	MER41B
16	11418361	11418777	MER41A
16	11800532	11802225	MER41G
16	12807639	12809409	MER41B
16	15487522	15490770	MER41B
16	17590446	17591270	MER41B
16	17591614	17591945	MER41B
16	25036962	25038512	MER41B
16	27364126	27366432	MER41A
16	28328837	28329895	MER41B
16	53416018	53421079	MER41B
16	57226283	57226572	MER41B
16	60634910	60637106	MER41A
16	68991176	69001215	MER41B
16	69070047	69074703	MER41C
16	71436297	71439783	MER41D
16	74279147	74281424	MER41C
16	77990935	77996701	MER41C
16	85013329	85017793	MER41E
17	4001338	4001927	MER41A
17	4351919	4356462	MER41B
17	10209053	10212163	MER41B
17	19985531	19988338	MER41B
17	27476196	27478701	MER41A
17	28113236	28113514	MER41A
17	28240210	28244479	MER41B
17	29342034	29349022	MER41D
17	40604194	40609314	MER41C
17	42528751	42530786	MER41B
17	43591259	43597466	MER41B
17	43944240	43946448	MER41B
17	54806541	54809278	MER41A
17	60668756	60670267	MER41B
17	71936665	71937407	MER41B
17	76599666	76606000	MER41A;MER41B
17	80150260	80154778	MER41B
17	82338392	82339928	MER41G
18	399535	409495	MER41A
18	414725	422576	MER41A
18	11941443	11943501	MER41A
18	23036655	23036915	MER41B
18	23037165	23037721	MER41B
18	23280832	23286585	MER41B
18	40612638	40614251	MER41C
18	46159757	46161132	MER41B
18	48959896	48961775	MER41A
18	49311827	49316442	MER41A
18	50090439	50095692	MER41B
18	57209706	57211324	MER41B
18	58507273	58508978	MER41A
18	62862225	62863689	MER41A;MER41B
18	68437981	68439278	MER41B
18	70274828	70283299	MER41B
19	5861279	5861944	MER41A
19	8159980	8164704	MER41A
19	9074672	9076374	MER41A
19	16818148	16826947	MER41A;MER41B
19	17284532	17289298	MER41A
19	18408700	18409175	MER41B
19	21086398	21086797	MER41A
19	21090121	21091138	MER41A
19	21091453	21092257	MER41A
19	21365784	21366825	MER41A
19	33034229	33038289	MER41C
19	36745551	36745984	MER41A
19	39250336	39251784	MER41C
19	42486631	42488850	MER41B
19	42969420	42973819	MER41A;MER41C
19	43125837	43126655	MER41A
19	44588143	44593324	MER41B
19	48264285	48266102	MER41A
19	49715989	49719205	MER41B
19	52567066	52567400	MER41D
19	53580297	53583075	MER41C
19	57797543	57802742	MER41B
2	1772302	1778609	MER41B
2	9167820	9172155	MER41B
2	11120696	11124511	MER41A
2	20369156	20370858	MER41D
2	25644256	25644489	MER41A
2	31282460	31283431	MER41A
2	32931476	32936140	MER41B
2	39467680	39472021	MER41A
2	40400574	40402972	MER41B
2	42544242	42548348	MER41D
2	44105520	44111600	MER41A
2	47727310	47729562	MER41A
2	48047375	48052135	MER41A
2	61639378	61641398	MER41B
2	69449115	69453883	MER41A
2	74899909	74901034	MER41B
2	85614135	85614422	MER41C
2	98048838	98055232	MER41A
2	99606940	99612899	MER41A
2	102783410	102784850	MER41A
2	105256326	105257208	MER41A
2	105467025	105467870	MER41B
2	105468227	105468681	MER41B
2	106531144	106531846	MER41A
2	109643381	109648435	MER41A
2	112789907	112797127	MER41B
2	129727431	129728904	MER41B
2	134180235	134180687	MER41B
2	134590412	134591993	MER41A
2	134910728	134911367	MER41B
2	134911611	134911999	MER41B
2	135256037	135257273	MER41B
2	142979218	142981148	MER41B
2	152304209	152304923	MER41B
2	157878461	157878887	MER41C
2	163625740	163628336	MER41B
2	163849499	163851125	MER41B
2	165583074	165584126	MER41C
2	172835862	172841349	MER41A
2	191307514	191307980	MER41B
2	191320771	191324413	MER41B
2	191599797	191600087	MER41A
2	196536937	196539793	MER41C
2	207805141	207808231	MER41E
2	215617456	215617920	MER41A
2	222898432	222901295	MER41C
2	226482683	226485228	MER41A
2	230335181	230336660	MER41E
2	231006758	231018150	MER41C
2	234362227	234369308	MER41B
2	235442713	235445766	MER41A
20	4214876	4218936	MER41B
20	4309109	4312391	MER41A
20	5635868	5636969	MER41A
20	7691953	7693030	MER41B
20	12287049	12288699	MER41C
20	24130116	24136525	MER41B
20	31506244	31507239	MER41B
20	34323318	34323826	MER41B
20	37559024	37560933	MER41B;MER41C
20	44677072	44680102	MER41D
20	46634423	46640976	MER41B
20	48155105	48158636	MER41B
20	48278581	48280067	MER41C
20	49674093	49685546	MER41B
20	49758280	49771371	MER41A;MER41B
20	50433712	50442580	MER41A
20	50990401	50993315	MER41D
20	51091660	51095268	MER41B
20	51777726	51779303	MER41A
20	56826290	56835134	MER41A
20	63231225	63235295	MER41A
21	16387737	16390103	MER41C
21	17688614	17691531	MER41B
21	26714486	26716712	MER41A
21	42929235	42947691	MER41A
21	44844342	44844965	MER41C
21	44845451	44846742	MER41C
21	45010639	45014146	MER41E
22	20840058	20848146	MER41A
22	24195168	24209854	MER41A
22	26566947	26569634	MER41B
22	28544700	28545344	MER41B
22	31799146	31801826	MER41C
22	36976954	36978138	MER41B
22	42697019	42702351	MER41A
22	42733276	42746166	MER41A
22	44746810	44749492	MER41B
3	3707012	3709812	MER41C
3	4061241	4065435	MER41B
3	13429512	13431813	MER41A
3	13432080	13434755	MER41A
3	13938413	13939054	MER41C
3	13939351	13940954	MER41C
3	13949345	13955683	MER41C
3	15403453	15405317	MER41A
3	31310155	31313980	MER41B
3	34568388	34568810	MER41B
3	41966993	41967294	MER41B
3	45061674	45067536	MER41A;MER41B
3	46385820	46396259	MER41E
3	46431214	46434964	MER41B
3	50816234	50818757	MER41A
3	53902968	53903618	MER41C
3	54977919	54978348	MER41A
3	54978642	54985299	MER41A
3	72027346	72031107	MER41A
3	80731699	80736412	MER41B
3	110796892	110799443	MER41B
3	112393668	112396614	MER41C
3	117033127	117037149	MER41A
3	118479071	118479424	MER41B
3	118530723	118531168	MER41B
3	120098001	120101459	MER41A
3	120466657	120476104	MER41B
3	127732115	127733386	MER41A
3	128662114	128666869	MER41C
3	138845132	138848479	MER41A
3	142946768	142948162	MER41A
3	146502743	146505154	MER41B
3	151973850	151974750	MER41C
3	155424628	155425028	MER41A
3	161138574	161140351	MER41C
3	165456819	165457222	MER41C
3	170320190	170320458	MER41A
3	175399085	175399959	MER41A;MER41C
3	185268270	185268603	MER41B
3	191236171	191236734	MER41C
3	194921387	194922623	MER41A
3	195601614	195601908	MER41B
4	6311892	6315328	MER41C
4	8242381	8243139	MER41B
4	12612636	12618407	MER41A
4	15569330	15569616	MER41C
4	15569916	15570412	MER41C
4	15868527	15868991	MER41C
4	18644653	18645402	MER41C
4	25725371	25726793	MER41B
4	37668848	37673528	MER41B
4	38259566	38260122	MER41A
4	48908022	48910550	MER41B
4	48953256	48956755	MER41C
4	48957097	48958202	MER41A
4	56757095	56759498	MER41B
4	56759862	56760245	MER41B
4	61555198	61557092	MER41A
4	67721528	67722051	MER41B
4	74092227	74094101	MER41C
4	87361153	87361520	MER41A
4	87368045	87368930	MER41A
4	88608088	88614496	MER41A
4	98816188	98819040	MER41A
4	99165735	99166716	MER41B
4	106305683	106306241	MER41A
4	107350936	107351180	MER41C
4	107351446	107352298	MER41C
4	109608563	109611006	MER41A
4	110106102	110106534	MER41B
4	128321753	128327003	MER41B
4	138976269	138984562	MER41C
4	147707143	147711098	MER41B
4	156346340	156348560	MER41B
4	158540063	158540602	MER41B
4	159129625	159132477	MER41B
4	163384699	163386553	MER41B
4	172898864	172899853	MER41A
4	175443331	175446553	MER41C
4	175450788	175452920	MER41C
4	182260900	182265764	MER41A
4	182267944	182270140	MER41A
5	6380694	6381246	MER41A
5	34520901	34525181	MER41A
5	41524762	41529352	MER41B
5	43395985	43396394	MER41A
5	54820246	54823009	MER41B
5	55625337	55625713	MER41A
5	57732830	57737296	MER41A
5	62623424	62626336	MER41B
5	65097739	65106124	MER41D
5	94044279	94045077	MER41A
5	97907345	97909327	MER41B
5	100821573	100824410	MER41A
5	103057428	103058139	MER41B
5	108814075	108815217	MER41C
5	115929670	115931772	MER41A
5	116858175	116860228	MER41A
5	118991523	118991841	MER41B
5	122609935	122613575	MER41C
5	126513445	126516950	MER41B
5	128545360	128548412	MER41B
5	132970388	132973770	MER41B
5	138843435	138844697	MER41B
5	142442569	142448562	MER41B
5	149914024	149919929	MER41E
5	153078804	153081348	MER41B
5	160160250	160161663	MER41B
5	160166607	160168279	MER41B
5	172135107	172138993	MER41C
5	172314133	172316290	MER41A
5	175454113	175454410	MER41A
5	179827091	179828308	MER41A
6	3337486	3340459	MER41A
6	5541251	5542841	MER41B
6	7680060	7681692	MER41B
6	13951567	13954479	MER41C
6	15207255	15207696	MER41A
6	15896988	15898910	MER41B
6	21276056	21283891	MER41C
6	21399020	21399924	MER41B
6	26549434	26551763	MER41C
6	27567520	27569719	MER41B
6	27772048	27772830	MER41G
6	27882602	27886375	MER41A
6	27888406	27888667	MER41E
6	28000198	28002798	MER41G
6	28003190	28003598	MER41G
6	30853426	30856895	MER41B
6	30873881	30874174	MER41A
6	41189493	41190282	MER41B
6	52998742	52999433	MER41D
6	73563908	73569333	MER41B
6	75805883	75807676	MER41A
6	77092555	77094037	MER41D
6	107963863	107967109	MER41B
6	109422946	109426050	MER41A
6	110508297	110512478	MER41B
6	118111915	118112250	MER41C
6	119036929	119038896	MER41A
6	127397246	127397882	MER41B
6	132003418	132004448	MER41A
6	142025905	142027616	MER41C
6	143739130	143740344	MER41A
6	148444469	148447116	MER41B
6	151229526	151231553	MER41B
6	152312823	152315609	MER41C
6	158710457	158712630	MER41A
6	167481039	167481625	MER41B
6	168324063	168324943	MER41D
7	3259321	3260416	MER41A
7	7353276	7354723	MER41C
7	7794189	7800406	MER41B
7	19078156	19081062	MER41B
7	22091401	22092341	MER41C
7	22580648	22587706	MER41D
7	29619517	29619946	MER41A
7	32679132	32682097	MER41B
7	35014535	35016536	MER41B
7	41558566	41561150	MER41C
7	41750116	41755354	MER41A;MER41B;MER41C
7	51237755	51243238	MER41B
7	51620453	51622735	MER41C
7	54903958	54905059	MER41D
7	54905398	54906511	MER41D
7	63827427	63828306	MER41C
7	65092399	65092887	MER41A
7	65781532	65783162	MER41A
7	67357892	67361997	MER41B
7	74132495	74137044	MER41B
7	74137938	74139903	MER41B
7	74141189	74144698	MER41B
7	74153135	74161468	MER41B
7	80480460	80481167	MER41A
7	100916003	100918354	MER41B
7	100920207	100920806	MER41A
7	106459010	106462372	MER41B
7	111679394	111679644	MER41B
7	121503736	121506643	MER41A
7	127551620	127551934	MER41D
7	128901117	128902106	MER41A
7	131072013	131072268	MER41B
7	138358162	138359748	MER41A;MER41B
7	140565994	140566320	MER41A
7	149132469	149133537	MER41A
7	157306490	157312124	MER41B
8	568581	576569	MER41C
8	8941006	8946349	MER41B
8	17486468	17491730	MER41A
8	26148868	26153250	MER41E
8	37881084	37883885	MER41C
8	38865801	38867818	MER41A
8	39232801	39234401	MER41B
8	41184372	41187221	MER41B
8	41187567	41187817	MER41B
8	54104128	54108521	MER41A;MER41B
8	55211574	55214306	MER41C
8	58299549	58301139	MER41B
8	78029397	78030703	MER41C
8	78677696	78678311	MER41A
8	84852606	84853014	MER41C
8	89796115	89803189	MER41B
8	89803470	89806086	MER41A
8	93872793	93876496	MER41B
8	97795612	97796934	MER41B
8	101355584	101357576	MER41A
8	102092120	102092634	MER41A
8	121802868	121804211	MER41B
8	125640317	125643786	MER41A
8	136933315	136933666	MER41C
8	143218592	143224546	MER41C
9	14894830	14896832	MER41A
9	33098646	33104582	MER41B
9	36385321	36387824	MER41A
9	36557754	36562838	MER41A;MER41B
9	77890837	77893244	MER41B
9	86893785	86895259	MER41A
9	87337604	87339269	MER41D
9	87463548	87468486	MER41B
9	88196404	88196730	MER41E
9	88510335	88517305	MER41A
9	92734130	92736546	MER41B
9	94351687	94352665	MER41B
9	94743142	94744700	MER41A
9	96101627	96102202	MER41A
9	96278344	96283335	MER41A
9	96905381	96905878	MER41B
9	98850430	98853233	MER41B
9	99300991	99302664	MER41B
9	100265893	100269364	MER41A;MER41C
9	124141146	124145280	MER41B
9	129556115	129559334	MER41A
9	129591555	129599500	MER41A
9	130150574	130150902	MER41A
X	786852	787637	MER41C
X	988061	988315	MER41C
X	997332	998649	MER41B
X	2889216	2892362	MER41A;MER41B
X	4181111	4183112	MER41B
X	4484558	4485085	MER41B
X	4673524	4676688	MER41B
X	6782037	6783068	MER41C
X	6783305	6783870	MER41C
X	6986100	6986764	MER41A
X	7017775	7019613	MER41A;MER41C
X	7192657	7200205	MER41C
X	13101191	13103816	MER41B
X	18098827	18100555	MER41B
X	19829475	19830040	MER41B
X	37882722	37884181	MER41C
X	40842143	40847107	MER41A;MER41C
X	40972258	40972989	MER41A
X	43616073	43618875	MER41A
X	46777361	46779130	MER41B
X	49086152	49086385	MER41B
X	50721128	50722747	MER41A
X	68460236	68463832	MER41B
X	71630421	71634166	MER41A
X	84729957	84731305	MER41A
X	149002803	149003366	MER41B
Y	12394013	12396409	MER41A;MER41B
Y	14435941	14438854	MER41C
Y	19167240	19169600	MER41A
X	144006589	144007681	MER41C

## Sheet: Table S4B - IFNG-stimulated
Chrom	Start	End	MER41 subfamily
1	1134875	1135532	MER41B
1	1135851	1136363	MER41B
1	8697053	8699173	MER41B
1	21390100	21390759	MER41B
1	21791843	21792271	MER41B
1	23596521	23597307	MER41B
1	27028103	27028351	MER41E
1	52330640	52331070	MER41B
1	94857854	94858134	MER41A
1	109284752	109285618	MER41B
1	143867515	143867867	MER41B
1	165673508	165673728	MER41B
1	179526432	179526897	MER41C
1	201511226	201513850	MER41A
1	228448163	228448572	MER41B
10	21574749	21574961	MER41B
10	34943549	34944016	MER41B
10	34944239	34944986	MER41B
10	34950727	34953024	MER41B
10	67277365	67278919	MER41B
10	87651068	87651606	MER41B
10	92972016	92972238	MER41E
10	96107625	96107888	MER41B
10	103525335	103531051	MER41B
11	18656772	18658501	MER41B
11	48270126	48270728	MER41B
11	48271007	48271310	MER41B
11	61639716	61641383	MER41B
11	62104546	62106049	MER41B
11	64484473	64484847	MER41B
11	73528479	73528980	MER41C
11	74195946	74197965	MER41C
11	76911112	76911790	MER41B
11	112250325	112250880	MER41D
11	120641831	120642518	MER41B
11	123258888	123260974	MER41B
12	14924893	14925291	MER41A
12	32020543	32021042	MER41B
12	32054514	32054744	MER41A
12	50765694	50766293	MER41A
12	56698677	56699055	MER41B
12	56699472	56700072	MER41B
12	70077900	70078123	MER41A
12	88144163	88144571	MER41B
12	124073182	124074217	MER41B
13	34622187	34622578	MER41A
13	52887001	52887233	MER41B
13	52887477	52887918	MER41B
14	73169682	73169953	MER41B
14	73170287	73170646	MER41B
14	95275315	95275686	MER41B
15	23514075	23515362	MER41B
15	45583370	45584628	MER41B
15	62120992	62121302	MER41B
15	63794075	63794302	MER41A
16	1292749	1294072	MER41A
16	23171245	23171546	MER41G
16	25679132	25679930	MER41B
16	31021043	31023795	MER41A
16	57109319	57109809	MER41A
16	69172735	69172965	MER41A
16	69173219	69173655	MER41A
16	77738965	77739803	MER41B
16	85970995	85971497	MER41A
17	13638654	13639370	MER41B
17	21130791	21131950	MER41B
17	48491122	48491801	MER41B
17	48825316	48825930	MER41B
17	49076002	49077012	MER41B
17	62634203	62634848	MER41B
17	66734011	66734881	MER41B
18	12903464	12904762	MER41B
18	43068688	43068947	MER41C
18	47471598	47471948	MER41B
18	50544462	50544810	MER41B
19	16473977	16478851	MER41A
19	23700126	23700357	MER41C
19	42975438	42975662	MER41A
19	52141667	52142005	MER41B
19	58217702	58217992	MER41A
2	15937204	15937626	MER41E
2	22673630	22674076	MER41B
2	46753361	46754502	MER41B
2	215618099	215618327	MER41A
2	219725747	219726214	MER41B
2	219726616	219727051	MER41B
20	2525939	2527122	MER41B
20	31505727	31506035	MER41B
20	38357960	38358464	MER41B
20	40947729	40948397	MER41B
20	48138205	48139217	MER41B
20	48139525	48140012	MER41B
21	28791672	28791924	MER41B
21	33253518	33253942	MER41A
21	41080856	41081087	MER41B
21	42968013	42968424	MER41A
22	25062955	25064408	MER41D
22	29083670	29084330	MER41B
22	29152373	29153572	MER41B
22	36197505	36198324	MER41G
22	36258695	36259165	MER41G
22	38515112	38515355	MER41B
3	32047884	32048099	MER41B
3	46385259	46385487	MER41E
3	88191796	88192039	MER41B
3	88192279	88192788	MER41B
3	88195523	88196481	MER41B
3	95923133	95924080	MER41B
3	99776147	99776900	MER41B
3	129690441	129696781	MER41A
3	129698950	129699930	MER41B
3	170027603	170028073	MER41B
3	183374764	183375397	MER41D
3	191449406	191449776	MER41B
3	196842412	196842687	MER41B
4	3043124	3043440	MER41B
4	3058036	3058442	MER41B
4	18871795	18872066	MER41A
4	64199950	64200251	MER41B
4	67457256	67457504	MER41B
4	96357091	96357522	MER41C
4	99084052	99084313	MER41B
4	111681266	111682294	MER41B
4	122906686	122907130	MER41B
4	137469224	137469517	MER41C
4	171961921	171963377	MER41B
4	183349346	183349616	MER41B
5	5522928	5523283	MER41C
5	5523788	5524088	MER41C
5	27817902	27818139	MER41A
5	95726610	95729951	MER41B
6	2980246	2981076	MER41B
6	12586580	12587299	MER41A
6	15210513	15210849	MER41A
6	15895536	15895769	MER41B
6	15896020	15896477	MER41B
6	42470781	42472416	MER41B
6	110817295	110822303	MER41B
6	123668241	123669723	MER41B
6	157754916	157755146	MER41A
6	158893607	158894502	MER41B
6	160238852	160239743	MER41B
7	4794979	4795865	MER41B
7	44716813	44717095	MER41A
7	51328167	51330586	MER41A
7	51331136	51331605	MER41C
7	73790194	73796166	MER41A
7	82695339	82697252	MER41B
7	82700215	82700614	MER41B
7	84913325	84913656	MER41A
7	87532712	87532966	MER41B
7	98255014	98255280	MER41B
7	100918821	100919411	MER41A
7	138656404	138660280	MER41B
7	142408773	142410056	MER41C
8	20277276	20277850	MER41B
8	38004550	38004857	MER41A
8	41458262	41458968	MER41B
8	74796861	74797078	MER41B
8	93222368	93223429	MER41B
8	143546434	143547275	MER41B
8	143547504	143548678	MER41B
9	675686	676106	MER41B
9	77893680	77894091	MER41B
9	86183576	86184340	MER41B
9	112546012	112547251	MER41B
9	114556656	114557872	MER41B
X	3731932	3732437	MER41B
X	3732653	3733271	MER41B
X	45009283	45009758	MER41B
X	48679503	48681862	MER41B
Y	7259215	7260189	MER41B
13	113389767	113392236	MER41A
14	20493070	20494149	MER41D
14	35958938	35959286	MER41B
14	43789915	43791609	MER41A
14	50333177	50333461	MER41B
14	50938248	50939022	MER41B
14	61125172	61125438	MER41A
14	64638797	64643176	MER41A
14	64643522	64648242	MER41A
14	65368135	65370505	MER41B
14	67268122	67270705	MER41B
14	71130826	71131611	MER41B
14	71288702	71291775	MER41B
14	72907415	72908144	MER41A
14	75599956	75600458	MER41B
14	84484642	84485129	MER41B
14	89439063	89444007	MER41A
14	91117452	91118489	MER41B
14	92562840	92567077	MER41B
14	94089089	94089451	MER41B
14	95678041	95681352	MER41B
14	96459165	96470301	MER41C;MER41D
14	101918622	101919430	MER41B
14	102533132	102534280	MER41A
14	102550266	102551169	MER41A
14	102551427	102553655	MER41A
15	31156767	31158904	MER41C
15	33083377	33085114	MER41B
15	35695506	35701848	MER41B
15	41138688	41139613	MER41B
15	41579991	41590863	MER41A
15	53769360	53769694	MER41B
15	56081685	56083344	MER41C
15	59386846	59387693	MER41C
15	63226432	63227688	MER41A
15	67920819	67921610	MER41B
15	89778866	89785900	MER41B
15	90321390	90322314	MER41A
15	90323051	90323326	MER41B
15	95871514	95875577	MER41B
16	4772669	4773394	MER41B
16	10324486	10325673	MER41A
16	10327545	10329658	MER41C
16	11799644	11800598	MER41G
16	12809336	12809690	MER41B
16	25037491	25046130	MER41B
16	25571159	25571601	MER41B
16	27363922	27367122	MER41A
16	53412877	53421470	MER41B
16	54583528	54584051	MER41C
16	57226800	57227346	MER41B
16	60632974	60637607	MER41A
16	62257994	62258239	MER41B
16	68991520	69001293	MER41B
16	69070251	69070558	MER41C
16	69070904	69074071	MER41C
16	69172691	69173260	MER41A
16	74280453	74280822	MER41C
16	75559063	75559366	MER41B
16	75559730	75560088	MER41B
16	77990664	77996507	MER41C
16	85013100	85017673	MER41E
16	85018109	85019301	MER41E
16	85971313	85971637	MER41A
17	4351827	4356364	MER41B
17	15561624	15561903	MER41A
17	19985114	19988384	MER41B
17	27476197	27478499	MER41A
17	28113224	28113480	MER41A
17	29344667	29345098	MER41D
17	34608939	34612492	MER41E
17	40604583	40609467	MER41C
17	42529288	42529991	MER41B
17	42531196	42531854	MER41B
17	43594420	43596559	MER41B
17	45044253	45049411	MER41B
17	57023955	57024280	MER41B
17	71340738	71341361	MER41A
17	71936607	71937010	MER41B
17	76555206	76556455	MER41A
17	76801567	76801929	MER41B
17	78986403	78987981	MER41A
17	79010864	79012692	MER41B
17	79016070	79017629	MER41B
17	79017858	79018679	MER41B
17	82338459	82339685	MER41G
18	405284	406561	MER41A
18	11941398	11943385	MER41A
18	23281320	23286611	MER41B
18	43068608	43068913	MER41C
18	46158399	46161073	MER41B
18	48961652	48961884	MER41A
18	49311896	49315253	MER41A
18	50088678	50096489	MER41B
18	57210069	57211132	MER41B
18	62863949	62864447	MER41B
18	68437777	68439641	MER41B
18	70274980	70282243	MER41B
19	2167873	2173791	MER41D
19	5856586	5860725	MER41A
19	8158905	8164820	MER41A
19	9073493	9077953	MER41A
19	16475339	16477633	MER41A
19	16817788	16827127	MER41A;MER41B
19	17286012	17288278	MER41A
19	18408717	18409139	MER41B
19	21021981	21025344	MER41A
19	21365978	21366744	MER41A
19	23699965	23700483	MER41C
19	35165692	35166139	MER41B
19	36745508	36745978	MER41A
19	39250552	39251729	MER41C
19	42486414	42490622	MER41B
19	42970022	42973391	MER41A;MER41C
19	44591910	44593316	MER41B
19	50174802	50175313	MER41D
19	53580389	53582182	MER41C
19	57798187	57799224	MER41B
2	1753155	1753611	MER41B
2	1772038	1778624	MER41B
2	9167879	9168346	MER41B
2	9169420	9169908	MER41B
2	11120056	11124658	MER41A
2	20369038	20370227	MER41D
2	21749689	21749987	MER41B
2	26752642	26762971	MER41A;MER41B
2	31281500	31285489	MER41A
2	32931996	32934655	MER41B
2	38776595	38777050	MER41C
2	39467684	39470644	MER41A
2	40400715	40403076	MER41B
2	44105611	44112102	MER41A
2	47727006	47729538	MER41A
2	48050114	48052776	MER41A
2	61639217	61641344	MER41B
2	69449073	69452079	MER41A
2	79779212	79782591	MER41A
2	98046259	98046583	MER41A
2	98049064	98060595	MER41A
2	99606033	99613157	MER41A
2	102784596	102784876	MER41A
2	105256105	105257109	MER41A
2	105467423	105468091	MER41B
2	105468363	105468699	MER41B
2	109643475	109649005	MER41A
2	112789777	112796889	MER41B
2	129727473	129728416	MER41B
2	134179697	134181282	MER41B
2	134590137	134590857	MER41A
2	134591169	134591408	MER41A
2	134910938	134912431	MER41B
2	142978970	142980935	MER41B
2	163624514	163629351	MER41B
2	163849605	163851612	MER41B
2	165581050	165588139	MER41C
2	172836030	172841531	MER41A
2	191306936	191307285	MER41B
2	191307581	191308529	MER41B
2	191320765	191326572	MER41B
2	191599697	191600160	MER41A
2	196535908	196540693	MER41C
2	202361861	202362103	MER41A
2	207772047	207772628	MER41B
2	207789240	207799150	MER41B
2	207804041	207808721	MER41E
2	215617477	215617840	MER41A
2	215618263	215619034	MER41A
2	222898074	222903424	MER41C
2	226472879	226485544	MER41A
2	231014202	231017742	MER41C
2	234362008	234365775	MER41B
2	235443440	235445692	MER41A
20	4214867	4219161	MER41B
20	4309778	4311686	MER41A
20	7691230	7693140	MER41B
20	12286524	12288801	MER41C
20	24131108	24131361	MER41B
20	34323177	34323492	MER41B
20	37559277	37559522	MER41B
20	44677539	44680086	MER41D
20	45331161	45331650	MER41B
20	46635766	46638580	MER41B
20	48155645	48158545	MER41B
20	48278039	48281631	MER41C
20	49673974	49683204	MER41B
20	49758695	49766303	MER41A;MER41B
20	50437099	50442369	MER41A
20	50991046	50993194	MER41D
20	51091621	51094549	MER41B
20	51777741	51778787	MER41A
20	56829697	56834889	MER41A
20	63231748	63234260	MER41A
21	16386995	16390926	MER41C
21	17688487	17690276	MER41B
21	17690589	17691230	MER41B
21	26714366	26716057	MER41A
21	33234639	33235027	MER41B
21	42929013	42947457	MER41A
21	44845494	44846832	MER41C
21	45010381	45014565	MER41E
22	20840211	20843529	MER41A
22	24199412	24209399	MER41A
22	28543507	28545572	MER41B
22	31798209	31798769	MER41C
22	31799112	31801601	MER41C
22	35668293	35668747	MER41A
22	36425930	36427526	MER41A
22	36976760	36978110	MER41B
22	42697297	42701489	MER41A
22	42734678	42746138	MER41A
22	43125357	43129250	MER41B
22	44746397	44749115	MER41B
3	3706055	3710596	MER41A;MER41C
3	4059904	4072084	MER41B
3	13938586	13939135	MER41C
3	13939470	13940652	MER41C
3	13947706	13955878	MER41C
3	15404170	15404645	MER41A
3	31311587	31313585	MER41B
3	34568172	34570368	MER41B
3	41966790	41967470	MER41B
3	45061706	45062677	MER41A;MER41B
3	45063005	45067097	MER41B
3	46385497	46387098	MER41E
3	53902888	53904197	MER41C
3	54981208	54984982	MER41A
3	72027119	72030311	MER41A
3	80731514	80736995	MER41B
3	112394985	112396015	MER41C
3	117032845	117033798	MER41A
3	117034065	117035714	MER41A
3	118530851	118531123	MER41B
3	120099019	120102058	MER41A
3	120466123	120474307	MER41B
3	127731652	127733969	MER41A
3	129698659	129700579	MER41B
3	138845336	138848500	MER41A
3	146502713	146505711	MER41B
3	151973670	151973898	MER41C
3	161140271	161140522	MER41C
3	165456740	165457036	MER41C
3	165457333	165458010	MER41C
3	166455973	166456452	MER41B
4	6313439	6315088	MER41C
4	8242081	8243423	MER41B
4	10980773	10981476	MER41C
4	10981811	10983909	MER41C
4	12612556	12617543	MER41A
4	15568054	15569790	MER41C
4	18644544	18645330	MER41C
4	18870972	18872079	MER41A
4	18872312	18872950	MER41A
4	25725598	25725967	MER41B
4	37670118	37671324	MER41B
4	37671577	37672949	MER41B
4	40266635	40267111	MER41A
4	48953502	48957863	MER41A;MER41C
4	61554192	61557834	MER41A
4	67720989	67722530	MER41B
4	71881792	71882273	MER41C
4	74092736	74094072	MER41C
4	88608335	88613962	MER41A
4	98816041	98819404	MER41A
4	99165531	99166356	MER41B
4	106302143	106306307	MER41A
4	107333867	107334374	MER41C
4	107350397	107352798	MER41C
4	109607359	109612138	MER41A
4	110105968	110106631	MER41B
4	112753672	112753915	MER41A
4	118358950	118359322	MER41B
4	121270888	121272577	MER41D
4	125040701	125041177	MER41A
4	128319360	128328259	MER41B
4	135174060	135174565	MER41C
4	138974037	138985358	MER41C
4	147708811	147710386	MER41B
4	153537337	153537593	MER41A
4	156346273	156348972	MER41B
4	163385076	163386115	MER41B
4	168766112	168767419	MER41A
4	172899014	172899869	MER41A
4	175443458	175446351	MER41C
4	175450817	175453762	MER41C
4	182261774	182265077	MER41A
4	182267944	182268610	MER41A
5	34520735	34525238	MER41A
5	41523960	41529973	MER41B
5	54569057	54573803	MER41C
5	54820155	54822956	MER41B
5	57731994	57737510	MER41A
5	62619051	62627403	MER41B
5	65098722	65101712	MER41D
5	73989616	73990086	MER41A
5	74591810	74592063	MER41A
5	76793219	76794016	MER41A
5	95727517	95728732	MER41B
5	97908572	97909615	MER41B
5	100821186	100824424	MER41A
5	103056575	103057857	MER41B
5	108622763	108623213	MER41E
5	115929168	115932285	MER41A
5	116858351	116860946	MER41A
5	122609777	122613751	MER41C
5	126514544	126515278	MER41B
5	128545957	128547922	MER41B
5	132969219	132973307	MER41B
5	138843452	138846096	MER41B
5	142443139	142447786	MER41B
5	149914137	149920114	MER41E
5	153078010	153081523	MER41B
5	160157795	160161804	MER41B
5	160166514	160168263	MER41B
5	172133357	172138447	MER41C
5	172313664	172316812	MER41A
6	3337549	3340469	MER41A
6	5540211	5543678	MER41B
6	7679140	7681993	MER41B
6	13951780	13954896	MER41C
6	15207350	15208393	MER41A
6	15896810	15899002	MER41B
6	21275316	21284459	MER41C
6	21399073	21399702	MER41B
6	27136000	27136882	MER41B
6	27567589	27569850	MER41B
6	27882000	27886351	MER41A
6	27887833	27888261	MER41E
6	30853855	30855254	MER41B
6	33377864	33378117	MER41A
6	56740071	56740466	MER41A
6	73563830	73569546	MER41B
6	77093556	77094006	MER41D
6	107962718	107967228	MER41B
6	109422265	109425281	MER41A
6	110507311	110512521	MER41B
6	110819896	110821259	MER41B
6	119036743	119042617	MER41A
6	120354789	120355162	MER41B
6	132003175	132004704	MER41A
6	142025011	142027823	MER41C
6	143739008	143740284	MER41A
6	148443940	148444881	MER41B
6	152311875	152316714	MER41C
6	158703724	158713016	MER41A
6	167480972	167481551	MER41B
7	3258875	3261562	MER41A
7	3262425	3262861	MER41A
7	3263488	3263718	MER41A
7	7353356	7355799	MER41C
7	7794052	7801130	MER41B
7	19077357	19082086	MER41B
7	22569470	22588147	MER41D
7	32678759	32682156	MER41B
7	35014240	35016328	MER41B
7	41558128	41561559	MER41C
7	41750278	41750966	MER41B
7	41751258	41753019	MER41C
7	41753263	41754076	MER41A
7	41754303	41755161	MER41A
7	51233162	51243072	MER41B
7	51620842	51623145	MER41C
7	65781589	65782940	MER41A
7	67358772	67361341	MER41B
7	74132575	74137050	MER41B
7	74141157	74143123	MER41B
7	74159107	74160388	MER41B
7	80480190	80481742	MER41A
7	82696149	82696525	MER41B
7	87358060	87358334	MER41D
7	100915841	100918939	MER41B
7	100919328	100919897	MER41A
7	106459901	106461856	MER41B
7	111679311	111679767	MER41B
7	121503528	121506577	MER41A
7	128901124	128901971	MER41A
7	140565641	140565969	MER41A
7	149133006	149133397	MER41A
7	157306363	157312175	MER41B
8	569378	575918	MER41C
8	8941164	8947830	MER41B
8	26147844	26153661	MER41E
8	36221968	36222261	MER41A
8	37880808	37887588	MER41C
8	38865592	38867770	MER41A
8	39232515	39235257	MER41B
8	41184068	41187099	MER41B
8	41187408	41187674	MER41B
8	54104184	54108156	MER41A;MER41B
8	54151534	54151985	MER41B
8	55212180	55213131	MER41C
8	58297046	58301400	MER41B
8	74601375	74602047	MER41B
8	74602342	74602646	MER41B
8	78341511	78341827	MER41E
8	78676716	78678849	MER41A
8	84852587	84852964	MER41C
8	89796905	89805508	MER41A;MER41B
8	90580225	90580571	MER41E
8	93222565	93222991	MER41B
8	93872568	93877035	MER41B
8	97801855	97802178	MER41B
8	101354771	101358733	MER41A
8	101461838	101462136	MER41A
8	101462883	101463131	MER41A
8	102091815	102092541	MER41A
8	143218409	143224524	MER41C
9	33099092	33100905	MER41B
9	34644504	34644769	MER41A
9	36385314	36387323	MER41A
9	36557874	36562156	MER41A;MER41B
9	76351968	76352717	MER41A
9	77890422	77894014	MER41B
9	82811188	82811650	MER41A
9	86893973	86895671	MER41A
9	87337289	87338606	MER41D
9	87466125	87468361	MER41B
9	88196181	88199016	MER41E
9	88510859	88515607	MER41A
9	92734234	92737259	MER41B
9	94351773	94352231	MER41B
9	94743146	94744749	MER41A
9	96101677	96102244	MER41A
9	96278441	96282767	MER41A
9	96905567	96905882	MER41B
9	98850388	98853158	MER41B
9	99301165	99302650	MER41B
9	100266037	100266340	MER41A
9	100266629	100268933	MER41A;MER41C
9	110591297	110591583	MER41D
9	124141069	124145501	MER41B
9	129556378	129558778	MER41A
9	129595840	129598770	MER41A
X	997314	998610	MER41B
X	1274466	1274737	MER41C
X	1278136	1278796	MER41C
X	2889195	2893467	MER41A;MER41B
X	4180846	4183378	MER41B
X	4483675	4485239	MER41B
X	4670182	4677068	MER41B
X	6783272	6783960	MER41C
X	6930399	6930799	MER41B
X	6986156	6986776	MER41A
X	7017032	7020074	MER41A;MER41C
X	7192937	7200865	MER41C
X	13101098	13104762	MER41B
X	18098660	18101116	MER41B
X	19829477	19829953	MER41B
X	37882820	37884233	MER41C
X	40842983	40847190	MER41A;MER41C
X	40972175	40972710	MER41A
X	43616434	43618207	MER41A
X	45009085	45009369	MER41B
X	46258185	46258862	MER41B
X	46777228	46779168	MER41B
X	49086114	49086362	MER41B
X	68460800	68464031	MER41B
X	71631215	71631722	MER41A
X	84729960	84739896	MER41A
X	93520731	93521000	MER41C
X	140922877	140924048	MER41B
X	144006589	144007681	MER41C

## Sheet: Description of Table S4
Table S4 MER41-enhances that are constitutively-active or IFN-stimulated in human TSCs This table includes the MER41-enhancers that are constitutively-active (A) or IFN-stimulated (B) in human TSCs. Constitutively-active enhancers are defifined as those have H3K27ac mark before IFNG-stimulation, and IFN-stimulated enhancers are those gained H3K27ac mark only after IFNG-stimulation. The MER41 subf…
