# Supplementary material for: Regulation of endogenous retrovirus–derived regulatory elements by GATA2/3 and MSX2 in human trophoblast stem cells
Source: HighWire-hosted journal article supplement (doi:10.1101/gr.277150.122), 2023-02-01
Supplement: Supplemental_Table_S5.xlsx [file Supplemental_Table_S5.xlsx]

## Sheet: Table S5
TF_name	ERV_class	ERV_family	ERV_name	observed_hits	pvalue	adjusted_pvalue	Enrichment
GATA2	LTR	ERV1	LTR8	313	0	0	33.566
GATA3	LTR	ERV1	LTR8	746	0	0	18.058
GATA3	LTR	ERV1	MER41A	459	0	0	15.508
GATA3	LTR	ERVK	MER11A	387	0	0	25.692
GATA3	LTR	ERV1	MER4B	370	2.8019e-302	1.15522e-298	18.721
GATA3	LTR	ERV1	MER41B	431	1.2296e-292	5.06964e-289	12.775
TFAP2A	LTR	ERV1	LTR8	320	4.0325e-287	1.6626e-283	21.223
GATA3	LTR	ERVK	LTR5_Hs	286	4.6613e-274	1.92185e-270	32.039
GATA3	LTR	ERVK	MER11C	325	5.9665e-273	2.45999e-269	22.689
TFAP2A	LTR	ERVK	MER11A	227	3.484e-248	1.43645e-244	36.9
TFAP2C	LTR	ERV1	LTR8	247	3.1005e-227	1.27834e-223	22.046
GATA3	LTR	ERV1	MER41C	228	8.2029e-227	3.38206e-223	29.868
TFAP2C	LTR	ERVK	LTR5_Hs	170	7.221e-221	2.97722e-217	60.831
GATA3	LTR	ERV1	MER4A1	324	7.133e-218	2.94094e-214	12.457
TFAP2A	LTR	ERVK	LTR5_Hs	179	6.4876e-214	2.67484e-210	48.215
GATA3	LTR	ERV1	MER4D1	287	1.8131e-208	7.47541e-205	14.617
ARID1A	LTR	ERVK	MER11A	259	1.1349e-194	4.67919e-191	16.44
GATA3	LTR	ERV1	LTR7	291	1.6574e-168	6.83346e-165	9.666
GATA3	LTR	ERV1	MER4E	186	8.6281e-161	3.55737e-157	21.381
ARID1A	LTR	ERVK	LTR5_Hs	190	2.6128e-154	1.07726e-150	19.367
MSX2	LTR	ERV1	MER41B	274	1.9214e-150	7.92193e-147	8.805
ARID1A	LTR	ERV1	MER41B	293	2.3715e-144	9.77769e-141	7.616
GATA2	LTR	ERV1	MER41B	154	1.0807e-140	4.45573e-137	21.211
GATA2	LTR	ERV1	MER41C	104	3.1198e-139	1.28629e-135	59.89
GATA2	LTR	ERVK	LTR5_Hs	116	8.5402e-138	3.52112e-134	43.582
GATA2	LTR	ERV1	MER4B	131	4.9079e-137	2.02353e-133	29.36
MSX2	LTR	ERV1	LTR8	279	2.9772e-127	1.2275e-123	6.818
ARID1A	LTR	ERV1	LTR8	305	7.4404e-127	3.06768e-123	6.136
ARID1A	LTR	ERVK	MER11D	117	8.0915e-126	3.33613e-122	42.107
GATA3	LTR	ERV1	LTR19A	124	7.576e-124	3.12358e-120	29.932
GATA2	LTR	ERVK	MER11A	121	2.7017e-121	1.11391e-117	27.101
GATA3	LTR	ERV1	MER67D	160	1.076e-115	4.43635e-112	13.964
GATA3	LTR	ERV1	MER31B	182	4.1806e-114	1.72366e-110	10.791
GATA3	LTR	ERV1	MER31A	174	1.6183e-112	6.67225e-109	11.384
GATA3	LTR	ERVK	MER11B	156	1.9095e-112	7.87287e-109	15.254
GATA2	LTR	ERV1	MER4A1	120	6.8473e-112	2.82314e-108	21.991
GATA3	LTR	ERVK	MER11D	111	6.0937e-111	2.51243e-107	34.013
GATA3	LTR	ERV1	MER4D	180	2.1772e-110	8.9766e-107	10.502
ARID1A	LTR	ERV1	MER41C	146	7.2035e-110	2.97e-106	15.278
SMARCA4	LTR	ERVK	LTR5_Hs	151	1.0798e-107	4.45202e-104	14.363
GATA2	LTR	ERV1	MER41A	123	5.9111e-106	2.43715e-102	18.466
GATA3	LTR	ERVL-MaLR	MLT1D	648	1.3843e-105	5.70747e-102	2.754
GATA2	LTR	ERV1	MER4E	86	9.5138e-104	3.92254e-100	43.258
TFAP2C	LTR	ERV1	MER41C	86	3.0147e-102	1.24296e-98	41.019
GATA3	LTR	ERV1	LTR2	143	1.092e-101	4.50232e-98	13.661
TFAP2A	LTR	ERVK	MER11B	102	3.5355e-101	1.45769e-97	27.301
GATA3	LTR	ERVL	MER21A	197	6.745e-100	2.78096e-96	7.815
GATA3	LTR	ERV1	MER4A	141	1.0223e-99	4.21494e-96	13.483
TFAP2A	LTR	ERV1	MER41C	91	6.4311e-98	2.65154e-94	31.624
SMARCA4	LTR	ERV1	LTR8	265	4.5297e-96	1.8676e-92	5.226
SMARCA4	LTR	ERV1	MER41B	235	3.8947e-95	1.60578e-91	5.891
ARID1A	LTR	ERVL	MER21A	195	9.0231e-93	3.72022e-89	7.183
TFAP2C	LTR	ERVK	MER11A	105	3.7929e-92	1.56381e-88	19.693
GATA3	LTR	ERV1	MER61E	90	1.5142e-90	6.24305e-87	30.466
SMARCA4	LTR	ERVK	MER11A	161	7.6702e-89	3.16242e-85	9.088
GATA3	LTR	ERV1	LTR7C	91	8.3167e-89	3.42898e-85	27.924
MSX2	LTR	ERV1	MER41C	117	7.2492e-88	2.98885e-84	14.766
GATA3	LTR	ERV1	MER67C	159	1.5294e-83	6.30572e-80	8.131
SMARCA4	LTR	ERVK	MER11D	89	1.644e-83	6.77821e-80	26.783
SMARCA4	LTR	ERV1	MER41C	122	9.8689e-82	4.06895e-78	12.104
TFAP2C	LTR	ERVL	MER21A	99	1.2288e-81	5.06634e-78	16.711
SMARCA4	LTR	ERVL	MER21A	182	4.6239e-81	1.90643e-77	6.576
GATA2	LTR	ERV1	MER4D1	89	8.4541e-80	3.48563e-76	19.916
TFAP2A	LTR	ERVL	MER21A	109	4.2483e-79	1.75157e-75	13.164
GATA2	LTR	ERVK	MER11C	87	5.3556e-78	2.20811e-74	20.396
MSX2	LTR	ERVL	MER21A	159	3.3593e-76	1.38504e-72	7.139
ARID1A	LTR	ERV1	MER41A	197	1.3016e-75	5.3665e-72	5.508
GATA2	LTR	ERV1	LTR19A	56	2.3489e-75	9.68451e-72	58.874
GATA3	LTR	ERV1	LTR8B	162	1.048e-73	4.3209e-70	6.747
GATA3	LTR	ERV1	PRIMA4_LTR	81	2.3084e-72	9.51753e-69	22.094
GATA3	LTR	ERV1	MER39	203	7.7639e-72	3.20106e-68	5.015
ARID1A	LTR	ERV1	MER39B	133	2.8078e-70	1.15766e-66	8.224
MSX2	LTR	ERV1	MER41A	171	4.517e-70	1.86236e-66	5.873
GATA3	LTR	ERVK	LTR3A	62	5.7454e-70	2.36883e-66	42.942
ARID1A	LTR	ERV1	MER4B	156	3.3599e-69	1.38529e-65	6.509
SMARCA4	LTR	ERVL-MaLR	THE1B	70	5.3658e-69	2.21232e-65	0.207
GATA2	LTR	ERV1	MER67D	65	1.3453e-66	5.54667e-63	26.652
ARID1A	LTR	ERV1	LTR2	111	1.785e-65	7.35956e-62	9.705
ARID1A	LTR	ERVK	LTR3A	59	1.1453e-63	4.72207e-60	37.369
ARID1A	LTR	ERV1	LTR19A	81	2.4356e-63	1.0042e-59	16.155
ARID1A	LTR	ERV1	MER31A	130	3.0732e-63	1.26708e-59	7.28
ARID1A	LTR	ERV1	MER39	201	7.9729e-63	3.28723e-59	4.439
GATA3	LTR	ERV1	HERV17-int	140	2.8213e-61	1.16322e-57	6.583
GATA2	LTR	ERV1	MER4A	59	5.4695e-60	2.25507e-56	26.105
TFAP2A	LTR	ERV1	MER61-int	94	3.1003e-59	1.27825e-55	10.402
SMARCA4	LTR	ERV1	MER4B	143	2.059e-58	8.48926e-55	5.862
GATA3	LTR	ERV1	MER84	67	7.5276e-58	3.10363e-54	19.494
TFAP2C	LTR	ERV1	MER4B	76	3.3283e-57	1.37226e-53	13.74
GATA3	LTR	ERV1	MER50	171	4.3492e-57	1.79318e-53	4.718
GATA2	LTR	ERV1	MER31B	65	4.6682e-57	1.9247e-53	18.514
GATA3	LTR	ERV1	LTR6A	66	1.6277e-56	6.71101e-53	19.711
MSX2	LTR	ERVK	LTR3A	51	5.6038e-56	2.31045e-52	36.992
MSX2	LTR	ERV1	LTR8B	128	7.7031e-56	3.17599e-52	6.29
GATA2	LTR	ERVK	LTR3A	35	2.142e-54	8.83147e-51	97.118
GATA3	LTR	ERV1	LTR30	52	6.8985e-54	2.84425e-50	34.432
GATA2	LTR	ERV1	LTR2B	42	7.3578e-54	3.03362e-50	49.48
GATA3	LTR	ERV1	LTR2B	67	1.1946e-53	4.92534e-50	16.916
MSX2	LTR	ERVL-MaLR	THE1B	56	1.6166e-53	6.66524e-50	0.212
TFAP2A	LTR	ERV1	MER4B	81	3.1174e-53	1.2853e-49	10.867
TFAP2C	LTR	ERVK	LTR3A	35	3.3247e-52	1.37077e-48	83.733
GATA3	LTR	ERV1	MER4C	81	3.5548e-52	1.46564e-48	10.926
SMARCA4	LTR	ERV1	MER41A	164	6.819e-52	2.81147e-48	4.469
GATA3	LTR	ERV1	MER4A1_	72	6.6636e-51	2.7474e-47	13.138
GATA3	LTR	ERVK	LTR14B	68	1.036e-50	4.27143e-47	14.557
GATA2	LTR	ERV1	MER31A	58	2.2878e-50	9.4326e-47	17.941
GATA2	LTR	ERVK	MER11B	54	2.381e-49	9.81686e-46	20.585
GATA3	LTR	ERVK	LTR22E	44	2.5478e-49	1.05046e-45	40.963
GATA2	LTR	ERV1	MER4D	59	2.0856e-48	8.59893e-45	15.988
ARID1A	LTR	ERV1	LTR8B	130	2.5227e-48	1.04011e-44	5.247
GATA3	LTR	ERV1	LTR39	106	2.8657e-48	1.18153e-44	6.598
MSX2	LTR	ERV1	MER39	157	3.4471e-48	1.42124e-44	4.303
MSX2	LTR	ERVK	MER11D	59	1.0507e-47	4.33204e-44	17.328
ARID1A	LTR	ERV1	LTR10A	62	1.6068e-47	6.62484e-44	15.32
TFAP2A	LTR	ERVK	LTR3A	35	2.3287e-47	9.60123e-44	60.693
TFAP2C	LTR	ERV1	MER61-int	72	2.4154e-47	9.95869e-44	10.485
SMARCA4	LTR	ERV1	LTR2	92	3.025e-47	1.24721e-43	7.765
MSX2	LTR	ERV1	MER4B	115	4.4092e-47	1.81791e-43	5.777
ARID1A	LTR	ERVL-MaLR	THE1B	105	8.3853e-47	3.45726e-43	0.317
MSX2	LTR	ERVK	LTR5_Hs	86	1.7627e-45	7.26761e-42	8.163
SMARCA4	LTR	ERVK	LTR3A	47	1.8708e-45	7.71331e-42	26.286
MSX2	LTR	ERV1	MER84	55	4.9402e-45	2.03684e-41	16.855
GATA3	LTR	ERV1	LTR49	108	5.6216e-45	2.31779e-41	5.759
ARID1A	LTR	ERVK	MER11B	84	5.446e-44	2.24539e-40	8.149
ARID1A	LTR	ERV1	LTR2B	59	1.2526e-43	5.16447e-40	14.168
SMARCA4	LTR	ERV1	MER39B	102	2.4335e-43	1.00333e-39	6.051
ARID1A	LTR	ERVK	HERVK3-int	64	2.5288e-43	1.04262e-39	12.51
MSX2	LTR	ERV1	MER39B	92	2.7767e-43	1.14483e-39	6.796
SMARCA4	LTR	ERVL-MaLR	MSTA	90	7.0508e-43	2.90704e-39	0.307
GATA2	LTR	ERV1	PRIMA4_LTR	34	8.8583e-43	3.65228e-39	40.193
TFAP2A	LTR	ERV1	MER61E	38	2.4931e-42	1.02791e-38	32.782
SMARCA4	LTR	ERV1	MER31A	105	3.015e-42	1.24308e-38	5.663
ARID1A	LTR	ERV1	MER84	57	5.2081e-42	2.1473e-38	13.834
GATA3	LTR	ERV1	LTR8A	111	6.2284e-42	2.56797e-38	5.295
ARID1A	LTR	ERV1	MER4D1	116	7.3516e-42	3.03106e-38	5.049
MSX2	LTR	ERV1	MER31A	93	1.1091e-41	4.57282e-38	6.369
TFAP2C	LTR	ERV1	MER4A1	66	1.4956e-41	6.16636e-38	9.906
GATA3	LTR	ERV1	LTR7B	80	7.5868e-41	3.12804e-37	7.58
GATA3	LTR	ERV1	LTR29	70	5.5283e-40	2.27932e-36	8.846
TFAP2A	LTR	ERV1	MER4A1	73	6.9459e-40	2.86379e-36	8.048
SMARCA4	LTR	ERV1	MER39	164	1.1183e-39	4.61075e-36	3.519
SMARCA4	LTR	ERV1	LTR2B	55	5.9144e-39	2.43851e-35	12.922
GATA2	LTR	ERV1	MER67C	52	1.2064e-38	4.97399e-35	12.979
GATA2	LTR	ERV1	MER61E	31	2.949e-38	1.21587e-34	42.002
ARID1A	LTR	ERV1	LTR7C	53	3.6138e-38	1.48997e-34	13.238
SMARCA4	LTR	ERV1	LTR19A	59	3.9682e-38	1.63609e-34	10.874
ARID1A	LTR	ERV1	LTR23	75	8.305e-38	3.42415e-34	7.392
TFAP2C	LTR	ERV1	MER61E	32	1.3858e-37	5.71365e-34	36.607
TFAP2C	LTR	ERV1	LTR19A	35	1.8209e-37	7.50757e-34	28.431
ARID1A	LTR	ERVK	HERVK9-int	95	2.0999e-37	8.65789e-34	5.693
TFAP2A	LTR	ERV1	LTR19A	38	2.213e-37	9.1242e-34	23.448
SMARCA4	LTR	ERVL-MaLR	THE1B-int	6	2.3268e-37	9.5934e-34	0.055
GATA3	LTR	ERV1	MER61-int	120	1.1063e-36	4.56127e-33	4.342
GATA2	LTR	ERV1	LTR30	26	1.5463e-36	6.37539e-33	65.289
GATA3	LTR	ERVK	LTR14C	35	5.2172e-36	2.15105e-32	31.16
ARID1A	LTR	ERV1	LTR7	132	7.0261e-36	2.89686e-32	3.848
MSX2	LTR	ERV1	LTR10A	48	1.1441e-35	4.71712e-32	13.768
GATA3	LTR	ERV1	LTR34	46	3.5288e-35	1.45492e-31	14.653
MSX2	LTR	ERVL-MaLR	THE1B-int	5	4.3743e-35	1.80352e-31	0.05
MSX2	LTR	ERV1	LTR19A	51	8.6367e-35	3.56091e-31	11.652
MSX2	LTR	ERV1	LTR7C	46	1.901e-34	7.83782e-31	13.866
MSX2	LTR	ERVK	HERVK3-int	53	1.9707e-34	8.1252e-31	11.206
SMARCA4	LTR	ERVK	HERVK3-int	55	2.8884e-34	1.19089e-30	10.539
MSX2	LTR	ERV1	LTR23	63	5.4033e-34	2.22778e-30	7.974
TFAP2C	LTR	ERVK	MER11B	44	9.0662e-34	3.73799e-30	13.94
GATA2	LTR	ERV1	MER84	28	1.7728e-33	7.30925e-30	37.272
ARID1A	LTR	ERVL	LTR32	86	2.4489e-33	1.00968e-29	5.356
MSX2	LTR	ERVL-MaLR	MSTA	71	2.7977e-33	1.15349e-29	0.312
MSX2	LTR	ERVK	MER11A	89	4.2229e-33	1.7411e-29	5.181
GATA2	LTR	ERVK	LTR22E	22	4.5976e-33	1.89559e-29	79.448
GATA3	LTR	ERV1	HERV9N-int	61	6.2984e-33	2.59683e-29	9.113
ARID1A	LTR	ERV1	MER61E	47	6.6971e-33	2.76121e-29	12.38
MSX2	LTR	ERV1	LTR2	68	8.0665e-33	3.32582e-29	6.909
ARID1A	LTR	ERVK	LTR22A	38	2.0333e-32	8.3833e-29	18.535
GATA3	LTR	ERVL	MER77	89	2.3458e-32	9.67173e-29	4.995
ARID1A	LTR	ERVL-MaLR	THE1B-int	12	3.0253e-32	1.24733e-28	0.108
SMARCA4	LTR	ERVL-MaLR	THE1C	29	3.3704e-32	1.38962e-28	0.196
GATA3	LTR	ERV1	LTR21A	30	8.8787e-32	3.66069e-28	32.17
GATA3	LTR	ERVK	LTR3	29	9.5128e-32	3.92213e-28	35.232
GATA3	LTR	ERVK	HERVK3-int	57	1.001e-31	4.12712e-28	8.908
GATA3	LTR	ERV1	LTR38A1	34	1.2847e-31	5.29682e-28	21.879
TFAP2A	LTR	ERV1	MER39	75	1.5288e-31	6.30324e-28	5.706
GATA2	LTR	ERV1	LTR6A	27	1.6493e-31	6.80006e-28	34.993
TFAP2A	LTR	ERVK	MER11C	57	3.0202e-31	1.24523e-27	8.08
GATA3	LTR	ERVL-MaLR	THE1B-int	26	8.0869e-31	3.33423e-27	0.187
GATA3	LTR	ERV1	LTR48	73	8.7074e-31	3.59006e-27	5.677
GATA3	LTR	ERV1	LTR12C	8	8.912e-31	3.67442e-27	0.082
GATA2	LTR	ERV1	LTR2	37	9.3379e-31	3.85002e-27	15.727
GATA2	LTR	ERV1	MER4A1_	30	9.6368e-31	3.97325e-27	24.943
TFAP2A	LTR	ERV1	HERV17-int	58	1.0481e-30	4.32132e-27	7.68
SMARCA4	LTR	ERV1	MER84	47	1.0999e-30	4.53489e-27	10.808
GATA3	LTR	ERVK	HERVK22-int	66	2.134e-30	8.79848e-27	6.868
SMARCA4	LTR	ERV1	LTR23	67	2.3629e-30	9.74224e-27	6.353
TFAP2C	LTR	ERV1	MER31A	43	4.195e-30	1.7296e-26	11.446
ARID1A	LTR	ERVL	LTR47A	62	4.2283e-30	1.74333e-26	6.944
GATA3	LTR	ERV1	MER39B	81	5.6501e-30	2.32954e-26	5.062
GATA3	LTR	ERVK	LTR22C0	31	6.6938e-30	2.75985e-26	24.814
TFAP2C	LTR	ERV1	PRIMA4_LTR	28	8.1268e-30	3.35068e-26	27.377
ARID1A	LTR	ERVL-MaLR	MSTA	116	8.5009e-30	3.50492e-26	0.404
GATA2	LTR	ERVK	MER11D	28	1.5456e-29	6.37251e-26	27.113
TFAP2A	LTR	ERV1	MER4A	42	4.9436e-29	2.03825e-25	11.269
ARID1A	LTR	ERV1	MER31B	90	5.6557e-29	2.33185e-25	4.406
GATA2	LTR	ERV1	LTR7	51	9.1181e-29	3.75939e-25	7.792
TFAP2C	LTR	ERV1	MER4A	37	1.4007e-28	5.77509e-25	13.585
SMARCA4	LTR	ERVL-MaLR	THE1D	57	1.4536e-28	5.99319e-25	0.303
ARID1A	LTR	ERV1	LTR39	82	1.842e-28	7.59457e-25	4.741
MSX2	LTR	ERVL-MaLR	THE1C	19	2.8855e-28	1.18969e-24	0.164
ARID1A	LTR	ERVK	LTR3	27	3.1792e-28	1.31078e-24	30.573
GATA2	LTR	ERVL	MER21A	47	4.258e-28	1.75557e-24	8.856
GATA3	LTR	ERV1	HERVH-int	310	6.6683e-28	2.74934e-24	2.032
ARID1A	LTR	ERVK	LTR14	27	1.3977e-27	5.76272e-24	28.958
TFAP2C	LTR	ERVL	MER77	41	1.6183e-27	6.67225e-24	9.937
GATA3	LTR	ERV1	MER61C	41	1.7591e-27	7.25277e-24	11.139
GATA3	LTR	ERVL	LTR47A2	36	1.9079e-27	7.86627e-24	13.94
TFAP2A	LTR	ERVL-MaLR	THE1B	10	1.9602e-27	8.0819e-24	0.108
SMARCA4	LTR	ERV1	LTR7C	43	2.975e-27	1.22659e-23	10.222
GATA3	LTR	ERV1	MER61F	32	4.1485e-27	1.71043e-23	17.807
TFAP2A	LTR	ERV1	LTR7C	28	4.9074e-27	2.02332e-23	21.605
ARID1A	LTR	ERV1	LTR30	32	6.8312e-27	2.8165e-23	17.896
GATA3	LTR	ERVL-MaLR	MLT1E2	150	9.8488e-27	4.06066e-23	2.775
GATA3	LTR	ERV1	HERV9-int	74	1.1331e-26	4.67177e-23	5.383
TFAP2C	LTR	ERV1	HERV17-int	47	1.2345e-26	5.08984e-23	8.271
SMARCA4	LTR	ERV1	MER4D1	93	1.3673e-26	5.63738e-23	3.957
GATA2	LTR	ERV1	MER4C	29	1.6995e-26	7.00704e-23	18.672
ARID1A	LTR	ERV1	MER4D	84	2.0757e-26	8.55811e-23	4.296
MSX2	LTR	ERV1	MER4D1	83	2.3344e-26	9.62473e-23	4.318
TFAP2C	LTR	ERVK	LTR22A	21	2.5487e-26	1.05083e-22	41.9
GATA3	LTR	ERVK	LTR14	26	2.7944e-26	1.15213e-22	27.779
GATA3	LTR	ERV1	MER4E1	72	2.8542e-26	1.17679e-22	4.95
SMARCA4	LTR	ERVL-MaLR	MLT1A0	133	3.4888e-26	1.43843e-22	0.446
SMARCA4	LTR	ERV1	LTR8B	96	6.3169e-26	2.60446e-22	3.769
TFAP2C	LTR	ERVK	MER11C	45	7.2841e-26	3.00323e-22	8.421
TFAP2A	LTR	ERV1	MER39B	44	9.6573e-26	3.9817e-22	8.562
TFAP2A	LTR	ERVL	LTR16A2	49	1.4826e-25	6.11276e-22	7.279
GATA3	LTR	ERV1	LTR35	26	1.6469e-25	6.79017e-22	24.508
GATA3	LTR	ERVL-MaLR	MSTA	106	1.975e-25	8.14293e-22	0.416
SMARCA4	LTR	ERV1	MER61E	40	2.4619e-25	1.01504e-21	10.129
GATA3	LTR	ERV1	MER72	62	3.0431e-25	1.25467e-21	5.554
GATA3	LTR	ERVK	LTR5B	57	3.1624e-25	1.30386e-21	6.244
SMARCA4	LTR	ERV1	MER57E3	36	3.3954e-25	1.39992e-21	11.878
ARID1A	LTR	ERVK	LTR22E	28	3.6978e-25	1.5246e-21	20.244
GATA3	LTR	ERV1	LTR6B	32	5.1304e-25	2.11526e-21	15.004
GATA2	LTR	ERV1	LTR8B	43	5.4976e-25	2.26666e-21	8.416
MSX2	LTR	ERVL-MaLR	THE1D	40	5.5965e-25	2.30744e-21	0.272
TFAP2A	LTR	ERVK	LTR22A	22	5.6758e-25	2.34013e-21	32.054
MSX2	LTR	ERV1	MER50	105	1.1044e-24	4.55344e-21	3.359
SMARCA4	LTR	ERVK	LTR14	25	1.1944e-24	4.92451e-21	25.755
SMARCA4	LTR	ERVL-MaLR	MSTB	30	1.4871e-24	6.13131e-21	0.236
GATA2	LTR	ERVK	HERVK22-int	31	1.945e-24	8.01924e-21	14.175
MSX2	LTR	ERV1	LTR39	68	2.2896e-24	9.44002e-21	4.812
TFAP2A	LTR	ERV1	MER31A	43	2.6126e-24	1.07717e-20	8.091
GATA3	LTR	ERV1	LTR10A	40	3.3272e-24	1.3718e-20	9.362
ARID1A	LTR	ERVL-MaLR	THE1C	41	5.528e-24	2.27919e-20	0.282
SMARCA4	LTR	ERVK	LTR22A	31	9.1013e-24	3.75247e-20	14.2
SMARCA4	LTR	ERV1	LTR10A	40	1.1801e-23	4.86555e-20	9.035
MSX2	LTR	ERV1	MER4C	48	1.2181e-23	5.02223e-20	6.869
ARID1A	LTR	ERVK	LTR5B	52	1.327e-23	5.47122e-20	6.36
MSX2	LTR	ERV1	LTR2B	37	1.5726e-23	6.48383e-20	9.999
MSX2	LTR	ERV1	MER61E	35	1.7254e-23	7.11382e-20	10.89
ARID1A	LTR	ERVK	LTR14C	26	1.8093e-23	7.45974e-20	20.497
GATA3	LTR	ERV1	MER4D0	44	1.929e-23	7.95327e-20	7.687
SMARCA4	LTR	ERVL	LTR32	72	3.3103e-23	1.36484e-19	4.347
GATA3	LTR	ERVL	LTR40a	91	4.7671e-23	1.96548e-19	3.538
GATA3	LTR	ERV1	LTR23	51	5.0077e-23	2.06467e-19	6.13
GATA3	LTR	ERV1	LTR71B	33	8.7538e-23	3.60919e-19	11.558
GATA3	LTR	ERV1	LTR35A	23	1.303e-22	5.37227e-19	24.166
MSX2	LTR	ERVK	LTR14	22	2.3699e-22	9.7711e-19	26.392
ARID1A	LTR	ERVK	LTR14B	41	2.9547e-22	1.21822e-18	7.911
GATA3	LTR	ERVL	LTR47A	49	3.3764e-22	1.39209e-18	6.167
MSX2	LTR	ERVK	LTR22E	24	4.1454e-22	1.70915e-18	20.417
ARID1A	LTR	ERVK	HERVK22-int	50	5.2153e-22	2.15027e-18	6.184
GATA3	LTR	ERVL	MLT2C1	93	8.7441e-22	3.60519e-18	3.316
MSX2	LTR	ERVK	LTR22A	27	1.1825e-21	4.87545e-18	14.996
ARID1A	LTR	ERVL-MaLR	THE1D	70	1.1944e-21	4.92451e-18	0.379
GATA3	LTR	ERV1	HERV1_LTRc	16	1.3059e-21	5.38423e-18	72.628
TFAP2C	LTR	ERV1	MER4D1	39	1.9506e-21	8.04232e-18	7.219
TFAP2A	LTR	ERV1	MER4A1_	27	2.1738e-21	8.96258e-18	13.875
TFAP2A	LTR	ERV1	MER31B	41	3.4267e-21	1.41283e-17	7.064
ARID1A	LTR	ERV1	LTR7B	57	4.6668e-21	1.92412e-17	4.929
GATA2	LTR	ERV1	LTR49	34	4.8826e-21	2.0131e-17	9.018
TFAP2A	LTR	ERV1	MER67C	42	5.3455e-21	2.20395e-17	6.412
GATA3	LTR	ERVK	HERVK9-int	82	6.6286e-21	2.73297e-17	3.658
SMARCA4	LTR	ERV1	LTR30	27	7.0984e-21	2.92667e-17	14.401
MSX2	LTR	ERVL-MaLR	MSTA-int	5	9.874e-21	4.07105e-17	0.079
GATA2	LTR	ERV1	MER50	45	1.3382e-20	5.5174e-17	6.053
MSX2	LTR	ERV1	LTR12C	7	1.5966e-20	6.58278e-17	0.103
ARID1A	LTR	ERV1	LTR24	35	1.6072e-20	6.62649e-17	8.695
SMARCA4	LTR	ERV1	LTR39	70	1.7034e-20	7.02312e-17	3.961
MSX2	LTR	ERV1	MER31B	67	1.8322e-20	7.55416e-17	4.08
TFAP2C	LTR	ERVL	MER74A	37	1.9702e-20	8.12313e-17	7.659
TFAP2A	LTR	ERVK	LTR22E	17	2.0797e-20	8.5746e-17	36.092
MSX2	LTR	ERV1	LTR30	25	2.6503e-20	1.09272e-16	15.535
ARID1A	LTR	ERVL	MER77	73	3.0065e-20	1.23958e-16	3.78
ARID1A	LTR	ERV1	MER4E	54	3.2692e-20	1.34789e-16	4.992
GATA3	LTR	ERVK	LTR22B1	26	3.3108e-20	1.36504e-16	14.24
TFAP2A	LTR	ERV1	MER67D	34	6.6759e-20	2.75247e-16	8.305
GATA3	LTR	ERV1	LTR19B	32	8.7775e-20	3.61896e-16	9.435
GATA3	LTR	ERV1	MER41-int	103	8.9872e-20	3.70542e-16	2.913
TFAP2A	LTR	ERV1	MER4D1	44	1.0198e-19	4.20464e-16	5.906
TFAP2C	LTR	ERV1	MER39	49	1.0332e-19	4.25988e-16	5.219
TFAP2A	LTR	ERV1	LTR7	51	1.0705e-19	4.41367e-16	4.825
GATA2	LTR	ERVL-MaLR	MLT1D	121	1.1611e-19	4.78722e-16	2.599
SMARCA4	LTR	ERV1	LTR7	102	1.206e-19	4.97234e-16	2.902
MSX2	LTR	ERV1	LTR24	31	1.2145e-19	5.00738e-16	9.621
TFAP2A	LTR	ERVL	MER77	39	1.6534e-19	6.81697e-16	6.723
ARID1A	LTR	ERV1	HERVE-int	46	2.4585e-19	1.01364e-15	5.932
GATA3	LTR	ERVL	MER74A	75	2.7003e-19	1.11333e-15	3.54
TFAP2A	LTR	ERVL-MaLR	MSTA	14	3.6205e-19	1.49273e-15	0.176
SMARCA4	LTR	ERVK	LTR5B	46	3.9684e-19	1.63617e-15	5.61
TFAP2C	LTR	ERVL-MaLR	THE1B	8	5.0591e-19	2.08587e-15	0.121
SMARCA4	LTR	ERVL-MaLR	MSTA-int	10	5.3449e-19	2.2037e-15	0.14
TFAP2A	LTR	ERV1	MER41B	55	5.3518e-19	2.20655e-15	4.482
TFAP2C	LTR	ERV1	MER84	19	6.2623e-19	2.58195e-15	21.402
ARID1A	LTR	ERVK	MER9a1	36	6.543e-19	2.69768e-15	7.417
TFAP2A	LTR	ERV1	MER4D	39	7.0007e-19	2.88639e-15	6.437
ARID1A	LTR	ERVL-MaLR	MLT1A0	152	7.099e-19	2.92692e-15	0.522
GATA3	LTR	ERV1	MER4CL34	53	7.9897e-19	3.29415e-15	4.679
GATA2	LTR	ERV1	LTR39	30	8.5895e-19	3.54145e-15	9.062
GATA2	LTR	ERVK	LTR14B	20	9.5757e-19	3.94806e-15	18.755
GATA3	LTR	ERVL	MER21B	111	1.4024e-18	5.7821e-15	2.662
TFAP2C	LTR	ERV1	MER41B	46	1.5101e-18	6.22614e-15	5.202
GATA3	LTR	ERV1	HERV9NC-int	56	1.9374e-18	7.9879e-15	4.777
TFAP2A	LTR	ERV1	LTR2B	22	2.2636e-18	9.33282e-15	14.959
SMARCA4	LTR	ERVK	LTR14C	22	2.2722e-18	9.36828e-15	16.408
TFAP2A	LTR	ERV1	LTR23	27	2.2989e-18	9.47836e-15	10.275
TFAP2A	LTR	ERVK	LTR14B	23	2.8786e-18	1.18685e-14	13.583
TFAP2A	LTR	ERVL	MER74A	40	4.1279e-18	1.70193e-14	5.911
ARID1A	LTR	ERV1	LTR29	47	4.4123e-18	1.81919e-14	5.055
GATA2	LTR	ERV1	LTR7C	18	4.4436e-18	1.8321e-14	21.638
TFAP2C	LTR	ERVL	LTR16A2	34	4.5184e-18	1.86294e-14	7.158
TFAP2A	LTR	ERV1	MER4E	30	4.9625e-18	2.04604e-14	8.555
ARID1A	LTR	ERVK	HERVK11-int	40	5.7211e-18	2.35881e-14	6.237
MSX2	LTR	ERVL-MaLR	MLT1A0	110	6.9651e-18	2.87171e-14	0.481
SMARCA4	LTR	ERV1	MER31B	72	8.3022e-18	3.423e-14	3.419
ARID1A	LTR	ERV1	HERV1_LTRc	14	9.0763e-18	3.74216e-14	53.438
SMARCA4	LTR	ERVL-MaLR	THE1A	8	1.0666e-17	4.39759e-14	0.127
GATA3	LTR	ERVL	LTR40A1	38	1.0754e-17	4.43387e-14	6.204
ARID1A	LTR	ERV1	MER4A1_	38	1.2699e-17	5.2358e-14	6.258
TFAP2A	LTR	ERV1	PRIMA4_LTR	21	1.774e-17	7.3142e-14	14.701
ARID1A	LTR	ERV1	MER50	103	1.9364e-17	7.98378e-14	2.678
MSX2	LTR	ERV1	MER4E	45	3.0808e-17	1.27021e-13	5.001
MSX2	LTR	ERV1	MER4A1_	34	6.0347e-17	2.48811e-13	6.756
GATA3	LTR	ERV1	MER49	67	6.1988e-17	2.55577e-13	3.461
SMARCA4	LTR	ERV1	MER4E	49	9.8349e-17	4.05493e-13	4.476
TFAP2C	LTR	ERVL	LTR47A	22	1.0329e-16	4.25865e-13	12.153
GATA3	LTR	ERVK	LTR22A	24	1.0396e-16	4.28627e-13	11.157
TFAP2A	LTR	ERV1	MER72	29	1.1965e-16	4.93317e-13	7.91
GATA3	LTR	ERVK	HERVK14C-int	22	1.307e-16	5.38876e-13	15.536
SMARCA4	LTR	ERVK	MER11B	49	1.3254e-16	5.46462e-13	4.486
GATA2	LTR	ERV1	LTR8A	31	1.6595e-16	6.84212e-13	7.102
ARID1A	LTR	ERVL-MaLR	MSTB	44	1.7227e-16	7.10269e-13	0.352
ARID1A	LTR	ERV1	LTR35A	19	1.9025e-16	7.84401e-13	17.006
GATA3	LTR	ERVL-MaLR	MSTB	36	1.9686e-16	8.11654e-13	0.323
TFAP2A	LTR	ERVL-MaLR	THE1C	1	2.1764e-16	8.9733e-13	0.025
GATA2	LTR	ERV1	LTR38A1	13	2.2568e-16	9.30479e-13	37.387
TFAP2A	LTR	ERV1	LTR35A	12	2.7089e-16	1.11688e-12	34.803
GATA3	LTR	ERVL-MaLR	THE1D-int	11	3.0499e-16	1.25747e-12	0.168
TFAP2A	LTR	ERV1	MER84	19	3.2241e-16	1.3293e-12	15.111
GATA3	LTR	ERV1	LTR19C	22	3.9298e-16	1.62026e-12	12.281
SMARCA4	LTR	ERVL	MLT2A1	6	4.6209e-16	1.9052e-12	0.111
GATA3	LTR	ERV1	MER52A	3	4.9381e-16	2.03598e-12	0.065
TFAP2C	LTR	ERVK	LTR22E	13	5.1506e-16	2.12359e-12	35.62
ARID1A	LTR	ERV1	MER4A	51	5.4679e-16	2.25442e-12	4.112
TFAP2A	LTR	ERV1	HERVE-int	29	5.4835e-16	2.26085e-12	7.755
MSX2	LTR	ERV1	LTR35	18	5.8045e-16	2.3932e-12	17.354
SMARCA4	LTR	ERVL	LTR47A	44	6.0151e-16	2.48003e-12	4.697
ARID1A	LTR	ERVL-MaLR	MSTA-int	15	8.5073e-16	3.50756e-12	0.207
ARID1A	LTR	ERVL	MLT2A1	6	8.6632e-16	3.57184e-12	0.113
GATA3	LTR	ERV1	LTR36	36	9.1035e-16	3.75337e-12	5.732
SMARCA4	LTR	ERV1	LTR24	30	9.1506e-16	3.77279e-12	7.188
TFAP2C	LTR	ERV1	MER67C	30	9.446e-16	3.89459e-12	6.421
SMARCA4	LTR	ERV1	MER4D	66	1.0334e-15	4.26071e-12	3.295
GATA2	LTR	ERVK	MER9B	9	1.1034e-15	4.54932e-12	119.519
TFAP2C	LTR	ERV1	LTR7	39	1.1944e-15	4.92451e-12	5.081
TFAP2A	LTR	ERVL	LTR47A	23	1.3179e-15	5.4337e-12	8.953
GATA2	LTR	ERVK	LTR3	11	1.4007e-15	5.77509e-12	53.282
MSX2	LTR	ERV1	MER4D	58	1.4864e-15	6.12843e-12	3.586
MSX2	LTR	ERV1	MER4A	45	1.5809e-15	6.51805e-12	4.452
TFAP2C	LTR	ERV1	LTR23	21	1.6449e-15	6.78192e-12	11.387
GATA2	LTR	ERVL	LTR47A2	14	2.0909e-15	8.62078e-12	25.72
GATA2	LTR	ERVK	LTR14C	12	2.1474e-15	8.85373e-12	39.634
GATA3	LTR	ERVL	LTR32	54	2.6885e-15	1.10847e-11	3.738
TFAP2C	LTR	ERV1	MER4A1_	19	3.2453e-15	1.33804e-11	13.205
MSX2	LTR	ERVL-MaLR	THE1D-int	5	3.2625e-15	1.34513e-11	0.102
TFAP2A	LTR	ERVK	HERVK3-int	23	3.8038e-15	1.56831e-11	9.73
GATA3	LTR	ERVL-MaLR	MLT1E3	72	4.4306e-15	1.82674e-11	2.997
TFAP2A	LTR	ERV1	LTR30	15	4.8859e-15	2.01446e-11	21.42
SMARCA4	LTR	ERV1	LTR7B	48	6.3617e-15	2.62293e-11	4.05
TFAP2A	LTR	ERVK	LTR3	12	6.5917e-15	2.71776e-11	36.504
TFAP2C	LTR	ERV1	MER4D	29	7.7915e-15	3.21244e-11	6.649
GATA3	LTR	ERVL-MaLR	MSTA-int	24	8.3246e-15	3.43223e-11	0.279
SMARCA4	LTR	ERV1	Harlequin-int	53	8.7288e-15	3.59888e-11	3.77
SMARCA4	LTR	ERV1	HERVE-int	39	8.9482e-15	3.68934e-11	5.085
SMARCA4	LTR	ERVL	MLT2A2	11	1.0619e-14	4.37821e-11	0.18
SMARCA4	LTR	ERVK	MER9a1	31	1.1809e-14	4.86885e-11	6.252
SMARCA4	LTR	ERVK	HERVK9-int	59	1.2331e-14	5.08407e-11	3.43
GATA2	LTR	ERV1	LTR68	14	1.5326e-14	6.31891e-11	17.621
GATA3	LTR	ERVL	MER77B	60	1.9658e-14	8.10499e-11	3.289
SMARCA4	LTR	ERV1	LTR29	42	2.1336e-14	8.79683e-11	4.4
SMARCA4	LTR	ERVL-MaLR	THE1C-int	4	2.4133e-14	9.95004e-11	0.09
TFAP2C	LTR	ERV1	LTR7C	16	2.4373e-14	1.0049e-10	16.144
GATA3	LTR	ERVL-MaLR	THE1B	173	2.4991e-14	1.03038e-10	0.586
ARID1A	LTR	ERV1	LTR35	18	2.6667e-14	1.09948e-10	13.795
GATA2	LTR	ERV1	HERV17-int	30	2.7635e-14	1.13939e-10	6.1
GATA2	LTR	ERVL	MER77	26	3.3917e-14	1.3984e-10	7.165
TFAP2A	LTR	ERV1	LTR39	31	3.4431e-14	1.41959e-10	5.804
TFAP2A	LTR	ERV1	LTR35	12	3.933e-14	1.62158e-10	30.71
GATA2	LTR	ERVK	HERVK9-int	30	4.2046e-14	1.73356e-10	6.037
MSX2	LTR	ERVL	LTR32	49	4.6218e-14	1.90557e-10	3.739
TFAP2A	LTR	ERV1	LTR12C	0	6.0446e-14	2.49219e-10	0
GATA3	LTR	ERVK	MER9B	12	6.2446e-14	2.57465e-10	36.017
SMARCA4	LTR	ERVL-MaLR	MLT1B	140	6.41e-14	2.64284e-10	0.559
SMARCA4	LTR	ERVL-MaLR	MLT1A1	33	6.7337e-14	2.7763e-10	0.336
MSX2	LTR	ERV1	MER41-int	76	6.8604e-14	2.82854e-10	2.745
GATA2	LTR	ERVK	LTR22C0	11	6.9522e-14	2.86639e-10	36.375
MSX2	LTR	ERVK	LTR14C	17	7.1038e-14	2.9289e-10	14.41
MSX2	LTR	ERVL	MER77	54	7.786e-14	3.21017e-10	3.422
TFAP2A	LTR	ERV1	LTR38A1	13	8.5948e-14	3.54364e-10	23.295
SMARCA4	LTR	ERVK	HERVK11-int	34	8.708e-14	3.59031e-10	5.332
GATA3	LTR	ERV1	MER51C	22	8.7853e-14	3.62218e-10	9.057
MSX2	LTR	ERVL-MaLR	MSTB	34	1.0407e-13	4.29081e-10	0.343
MSX2	LTR	ERVL-MaLR	THE1C-int	3	1.0846e-13	4.47181e-10	0.074
TFAP2C	LTR	ERV1	MER4E	22	1.4497e-13	5.97711e-10	8.43
GATA2	LTR	ERVL-MaLR	MSTA	7	1.5971e-13	6.58484e-10	0.142
MSX2	LTR	ERVK	LTR3	15	1.6383e-13	6.75471e-10	17.363
TFAP2A	LTR	ERVL-MaLR	MLT1B	15	1.6726e-13	6.89613e-10	0.229
TFAP2A	LTR	ERV1	LTR34	15	1.745e-13	7.19463e-10	13.288
GATA2	LTR	ERV1	MER39	37	2.0275e-13	8.35938e-10	4.505
GATA2	LTR	ERVK	LTR14	10	2.4607e-13	1.01455e-09	42.267
SMARCA4	LTR	ERVL-MaLR	MLT1I	69	2.6239e-13	1.08183e-09	0.458
ARID1A	LTR	ERV1	MER41-int	83	2.6889e-13	1.10863e-09	2.56
GATA3	LTR	ERV1	LTR59	17	3.336e-13	1.37543e-09	12.865
GATA3	LTR	ERVL-MaLR	THE1A-int	7	4.1232e-13	1.7e-09	0.145
GATA3	LTR	ERV1	LTR51	31	4.1747e-13	1.72123e-09	5.382
TFAP2A	LTR	ERV1	MER51C	14	4.3301e-13	1.7853e-09	17.44
SMARCA4	LTR	ERVK	LTR22E	18	4.3531e-13	1.79478e-09	11.548
TFAP2A	LTR	ERVK	LTR22C0	12	4.3562e-13	1.79606e-09	24.92
ARID1A	LTR	ERVL-MaLR	THE1D-int	11	4.5091e-13	1.8591e-09	0.194
SMARCA4	LTR	ERV1	LTR35	17	4.6514e-13	1.91777e-09	12.682
TFAP2A	LTR	ERV1	MER41A	42	4.8711e-13	2.00835e-09	3.752
MSX2	LTR	ERV1	MER52A	1	6.1215e-13	2.52389e-09	0.03
SMARCA4	LTR	ERVK	HERVKC4-int	15	6.1709e-13	2.54426e-09	17.121
ARID1A	LTR	ERVL-MaLR	THE1A	14	6.2763e-13	2.58772e-09	0.227
TFAP2C	LTR	ERV1	MER31B	26	6.627e-13	2.73231e-09	6.26
SMARCA4	LTR	ERV1	MER4A	46	7.2838e-13	3.00311e-09	3.65
SMARCA4	LTR	ERVL-MaLR	THE1D-int	11	8.5811e-13	3.53799e-09	0.197
GATA2	LTR	ERVL-MaLR	THE1B	12	9.1199e-13	3.76013e-09	0.21
GATA2	LTR	ERV1	LTR34	13	1.2257e-12	5.05356e-09	18.451
GATA2	LTR	ERV1	LTR48	21	1.3403e-12	5.52606e-09	7.969
ARID1A	LTR	ERV1	LTR71B	23	1.4982e-12	6.17708e-09	7.314
TFAP2A	LTR	ERVK	HERVK9-int	35	1.6013e-12	6.60216e-09	4.489
GATA2	LTR	ERVL	LTR40a	28	2.0771e-12	8.56388e-09	5.462
TFAP2A	LTR	ERVL	LTR16A1	39	2.4155e-12	9.95911e-09	3.952
SMARCA4	LTR	ERVK	LTR14B	29	2.5697e-12	1.05949e-08	5.375
SMARCA4	LTR	ERV1	MER4A1_	31	2.8611e-12	1.17963e-08	4.984
GATA3	LTR	ERV1	LTR37A	60	3.7217e-12	1.53446e-08	2.871
ARID1A	LTR	ERVL-MaLR	THE1C-int	7	3.7779e-12	1.55763e-08	0.153
SMARCA4	LTR	ERVK	LTR3	15	3.8588e-12	1.59098e-08	13.833
GATA3	LTR	ERV1	LTR72	18	4.4286e-12	1.82591e-08	9.776
GATA2	LTR	ERVL	LTR40A1	15	5.2714e-12	2.1734e-08	12.387
GATA3	LTR	ERV1	LTR48B	46	5.4452e-12	2.24506e-08	3.419
MSX2	LTR	ERV1	LTR48	42	5.6649e-12	2.33564e-08	3.657
MSX2	LTR	ERVK	HERVK22-int	34	5.9949e-12	2.4717e-08	4.472
MSX2	LTR	ERVL	LTR47A	33	6.5425e-12	2.69747e-08	4.48
GATA3	LTR	ERV1	MER61D	23	6.7461e-12	2.78142e-08	6.704
MSX2	LTR	ERV1	LTR35A	14	6.8933e-12	2.84211e-08	14.738
TFAP2C	LTR	ERV1	LTR36	15	6.9356e-12	2.85955e-08	10.223
SMARCA4	LTR	ERV1	MER4C	37	6.9863e-12	2.88045e-08	4.051
TFAP2A	LTR	ERVL	LTR16C	65	6.9863e-12	2.88045e-08	2.678
GATA3	LTR	ERVL	LTR16A2	60	1.2212e-11	5.03501e-08	2.787
GATA3	LTR	ERV1	MER34A	52	1.2412e-11	5.11747e-08	3.051
ARID1A	LTR	ERV1	MER41D	30	1.2415e-11	5.1187e-08	4.816
TFAP2C	LTR	ERVK	LTR22C0	9	1.2439e-11	5.1286e-08	24.663
GATA2	LTR	ERV1	LTR35	9	1.2476e-11	5.14385e-08	36.155
TFAP2A	LTR	ERV1	LTR36	18	1.2714e-11	5.24198e-08	8.771
SMARCA4	LTR	ERVK	HERVK22-int	35	1.275e-11	5.25682e-08	4.238
TFAP2C	LTR	ERVK	LTR3	8	1.3828e-11	5.70128e-08	31.739
TFAP2C	LTR	ERV1	LTR35A	9	1.4779e-11	6.09338e-08	35.702
ARID1A	LTR	ERV1	MER4A1	77	1.6537e-11	6.81821e-08	2.429
GATA2	LTR	ERV1	LTR72	10	1.6847e-11	6.94602e-08	26.43
ARID1A	LTR	ERV1	LTR19-int	22	1.734e-11	7.14928e-08	6.89
GATA3	LTR	ERV1	MER84-int	19	1.7719e-11	7.30554e-08	8.401
MSX2	LTR	ERVL	MLT2A1	6	1.8769e-11	7.73846e-08	0.144
MSX2	LTR	ERVL-MaLR	THE1A-int	3	2.158e-11	8.89743e-08	0.087
GATA3	LTR	ERV1	MER92B	37	2.3585e-11	9.7241e-08	3.672
TFAP2C	LTR	ERV1	HERVIP10F-int	20	2.3733e-11	9.78512e-08	7.407
GATA3	LTR	ERVL	MER21C	151	2.4348e-11	1.00387e-07	1.83
TFAP2A	LTR	ERV1	LTR21A	10	2.5383e-11	1.04654e-07	26.007
TFAP2C	LTR	ERVL	LTR16C	50	2.675e-11	1.1029e-07	2.936
SMARCA4	LTR	ERV1	HERV1_LTRc	10	2.838e-11	1.17011e-07	30.304
MSX2	LTR	ERVK	LTR14B	25	3.0363e-11	1.25187e-07	5.603
MSX2	LTR	ERVL-MaLR	MLT1B	107	3.548e-11	1.46284e-07	0.556
ARID1A	LTR	ERV1	LTR34	23	3.5562e-11	1.46622e-07	6.156
TFAP2C	LTR	ERV1	LTR35	9	3.9614e-11	1.63329e-07	31.675
GATA3	LTR	ERV1	MER65D	26	4.306e-11	1.77536e-07	5.252
TFAP2C	LTR	ERV1	LTR21A	9	4.4229e-11	1.82356e-07	31.489
MSX2	LTR	ERV1	LTR29	31	4.4735e-11	1.84442e-07	4.124
SMARCA4	LTR	ERV1	MER61D	23	4.5035e-11	1.85679e-07	6.076
TFAP2C	LTR	ERV1	LTR39	23	4.6525e-11	1.91823e-07	5.878
TFAP2C	LTR	ERV1	MER41A	33	4.7339e-11	1.95179e-07	4.085
GATA3	LTR	ERV1	MER61B	26	5.073e-11	2.0916e-07	5.224
TFAP2A	LTR	ERVL	LTR40A1	16	5.4961e-11	2.26604e-07	8.115
TFAP2A	LTR	ERVL-MaLR	MLT1A0	27	5.5706e-11	2.29676e-07	0.347
ARID1A	LTR	ERV1	HERV17-int	56	5.947e-11	2.45195e-07	2.814
TFAP2C	LTR	ERV1	MER67D	19	6.1321e-11	2.52826e-07	6.5
GATA3	LTR	ERV1	PRIMA41-int	38	7.0127e-11	2.89134e-07	3.682
ARID1A	LTR	ERV1	MER4C	35	7.3553e-11	3.03259e-07	3.883
ARID1A	LTR	ERVK	MER9B	10	7.5346e-11	3.10652e-07	26.857
ARID1A	LTR	ERVK	HERVK11D-int	14	7.8547e-11	3.23849e-07	13.99
GATA2	LTR	ERV1	MER61C	12	7.8594e-11	3.24043e-07	15.137
SMARCA4	LTR	ERV1	MER4A1	76	8.4901e-11	3.50047e-07	2.364
GATA3	LTR	ERV1	LOR1a	39	8.6658e-11	3.57291e-07	3.533
SMARCA4	LTR	ERVL-MaLR	THE1A-int	5	9.1614e-11	3.77725e-07	0.133
TFAP2A	LTR	ERVL-MaLR	THE1D	12	9.9812e-11	4.11525e-07	0.233
ARID1A	LTR	ERV1	LTR48	45	1.1038e-10	4.55097e-07	3.159
MSX2	LTR	ERV1	LTR71B	18	1.1296e-10	4.65734e-07	6.872
SMARCA4	LTR	ERV1	LTR46	21	1.1506e-10	4.74392e-07	6.427
SMARCA4	LTR	ERVL-MaLR	MSTB1	21	1.1828e-10	4.87668e-07	0.314
ARID1A	LTR	ERVL-MaLR	MLT1B	150	1.276e-10	5.26095e-07	0.612
MSX2	LTR	ERV1	HERV1_LTRc	9	1.2985e-10	5.35372e-07	32.2
TFAP2A	LTR	ERV1	HERV1_LTRc	7	1.3197e-10	5.44112e-07	61.338
SMARCA4	LTR	ERVL-MaLR	MLT1A	62	1.3561e-10	5.5912e-07	0.482
GATA3	LTR	ERV1	LTR24	22	1.3906e-10	5.73344e-07	5.973
ARID1A	LTR	ERVL	MLT2A2	17	1.4002e-10	5.77302e-07	0.282
ARID1A	LTR	ERV1	LTR6B	18	1.4674e-10	6.05009e-07	7.835
SMARCA4	LTR	ERV1	LTR6B	18	1.5213e-10	6.27232e-07	7.817
SMARCA4	LTR	ERV1	LTR35A	14	1.5499e-10	6.39024e-07	11.563
SMARCA4	LTR	ERV1	LTR48	45	1.5759e-10	6.49744e-07	3.123
GATA3	LTR	ERV1	MER101B	20	1.6318e-10	6.72791e-07	6.644
GATA3	LTR	ERV1	LTR38B	20	1.722e-10	7.09981e-07	6.664
GATA2	LTR	ERV1	LTR35A	8	1.8686e-10	7.70424e-07	35.806
ARID1A	LTR	ERV1	HERVIP10F-int	33	2.0102e-10	8.28805e-07	4.018
TFAP2A	LTR	ERV1	HERVH-int	102	2.3315e-10	9.61277e-07	2.017
SMARCA4	LTR	ERV1	MER50	85	2.4916e-10	1.02729e-06	2.176
MSX2	LTR	ERVK	HERVK11-int	28	2.6185e-10	1.07961e-06	4.59
TFAP2A	LTR	ERVK	LTR14C	10	2.8058e-10	1.15683e-06	20.112
TFAP2A	LTR	ERVK	MER9B	7	3.2474e-10	1.3389e-06	53.182
TFAP2C	LTR	ERV1	LTR2B	12	3.4228e-10	1.41122e-06	10.616
GATA2	LTR	ERV1	LTR21A	8	3.8066e-10	1.56946e-06	32.73
ARID1A	LTR	ERVK	MER9a3	32	4.1916e-10	1.7282e-06	3.911
ARID1A	LTR	ERV1	LTR4	14	4.2242e-10	1.74164e-06	10.702
ARID1A	LTR	ERV1	PRIMA4_LTR	24	4.6605e-10	1.92152e-06	5.11
GATA2	LTR	ERV1	HERV1_LTRc	6	4.6816e-10	1.93022e-06	81.158
GATA2	LTR	ERV1	MER4CL34	17	4.8774e-10	2.01095e-06	7.431
MSX2	LTR	ERVL-MaLR	THE1A	12	4.9289e-10	2.03219e-06	0.245
GATA2	LTR	ERV1	MER4D0	13	5.2569e-10	2.16742e-06	11.073
GATA2	LTR	ERV1	MER4E1	19	5.4359e-10	2.24122e-06	6.401
ARID1A	LTR	ERV1	LTR46	20	5.5248e-10	2.27788e-06	6.202
SMARCA4	LTR	ERV1	LTR71B	20	5.8054e-10	2.39357e-06	6.213
GATA2	LTR	ERV1	MER72	17	5.8466e-10	2.41055e-06	7.346
GATA3	LTR	ERVK	HERVK11-int	33	6.4869e-10	2.67455e-06	3.856
TFAP2C	LTR	ERV1	MER72	18	6.5051e-10	2.68205e-06	6.78
MSX2	LTR	ERVK	LTR5B	30	6.9727e-10	2.87484e-06	4.051
ARID1A	LTR	ERVK	HERVK14C-int	14	7.496e-10	3.0906e-06	11.035
GATA3	LTR	ERV1	LTR68	22	7.8944e-10	3.25486e-06	5.407
GATA3	LTR	ERV1	HERVIP10F-int	37	8.9484e-10	3.68943e-06	3.479
GATA2	LTR	ERVK	LTR22B1	9	9.0605e-10	3.73564e-06	21.806
TFAP2C	LTR	ERV1	MER39B	20	9.4952e-10	3.91487e-06	5.246
MSX2	LTR	ERV1	MER41D	24	1.1287e-09	4.65363e-06	4.825
GATA2	LTR	ERV1	HERV9N-int	15	1.2232e-09	5.04325e-06	8.503
ARID1A	LTR	ERV1	LTR12C	28	1.2292e-09	5.06799e-06	0.372
GATA3	LTR	ERV1	LTR31	20	1.2389e-09	5.10798e-06	5.908
SMARCA4	LTR	ERVL-MaLR	MSTD	52	1.3085e-09	5.39495e-06	0.472
TFAP2C	LTR	ERVK	LTR14B	13	1.3408e-09	5.52812e-06	10.264
MSX2	LTR	ERV1	PRIMA4_LTR	21	1.6795e-09	6.92458e-06	5.455
TFAP2A	LTR	ERV1	LTR68	12	1.7596e-09	7.25483e-06	9.232
GATA2	LTR	ERVL	LTR32	18	1.9571e-09	8.06912e-06	6.288
TFAP2A	LTR	ERV1	LTR59	9	1.986e-09	8.18828e-06	20.067
SMARCA4	LTR	ERVK	MER9B	9	2.0248e-09	8.34825e-06	23.012
ARID1A	LTR	ERV1	LTR38C	15	2.0342e-09	8.38701e-06	8.358
SMARCA4	LTR	ERVL-MaLR	MSTC	11	2.0618e-09	8.5008e-06	0.239
GATA3	LTR	ERVL	MLT2A1	11	2.0801e-09	8.57625e-06	0.241
TFAP2C	LTR	ERVL-MaLR	THE1C	3	2.0877e-09	8.60759e-06	0.104
TFAP2A	LTR	ERV1	MER50	37	2.1279e-09	8.77333e-06	3.076
MSX2	LTR	ERV1	MER84-int	15	2.1681e-09	8.93908e-06	8.313
TFAP2C	LTR	ERVL	LTR16E2	26	2.3342e-09	9.62391e-06	4.238
SMARCA4	LTR	ERV1	LTR38C	15	2.3514e-09	9.69482e-06	8.266
TFAP2C	LTR	ERVK	LTR14C	9	2.5285e-09	1.0425e-05	19.429
ARID1A	LTR	ERVK	HERVKC4-int	12	2.7955e-09	1.15258e-05	12.352
MSX2	LTR	ERVL	MLT2A2	13	2.8802e-09	1.18751e-05	0.267
SMARCA4	LTR	ERV1	MER52A	6	2.9787e-09	1.22812e-05	0.168
TFAP2C	LTR	ERVK	HERVK3-int	15	3.4304e-09	1.41435e-05	7.762
TFAP2C	LTR	ERV1	LTR12C	1	3.5608e-09	1.46812e-05	0.043
TFAP2A	LTR	ERV1	MER41-int	36	3.5623e-09	1.46874e-05	3.076
SMARCA4	LTR	ERVK	LTR13A	20	3.7441e-09	1.54369e-05	5.584
ARID1A	LTR	ERVL-MaLR	MSTC	11	3.7515e-09	1.54674e-05	0.244
GATA3	LTR	ERV1	MER67B	26	3.8532e-09	1.58867e-05	4.207
MSX2	LTR	ERV1	LTR46	17	4.0854e-09	1.68441e-05	6.583
TFAP2C	LTR	ERVL	LTR40a	24	4.5507e-09	1.87625e-05	4.074
ARID1A	LTR	ERVK	LTR13A	20	4.6428e-09	1.91423e-05	5.51
GATA3	LTR	ERVL-MaLR	MSTC	8	4.9366e-09	2.03536e-05	0.207
TFAP2C	LTR	ERV1	LTR68	10	5.016e-09	2.0681e-05	10.857
GATA2	LTR	ERVL-MaLR	THE1B-int	3	5.6134e-09	2.3144e-05	0.107
GATA2	LTR	ERV1	LTR10A	11	5.736e-09	2.36495e-05	11.848
TFAP2A	LTR	ERV1	LTR19B	12	5.7546e-09	2.37262e-05	10.322
GATA3	LTR	ERV1	LTR4	13	5.9635e-09	2.45875e-05	9.547
GATA3	LTR	ERV1	PABL_B	23	6.1437e-09	2.53305e-05	4.61
TFAP2A	LTR	ERVL-MaLR	MSTB	6	6.1858e-09	2.55041e-05	0.172
GATA3	LTR	ERVK	LTR13A	21	6.2902e-09	2.59345e-05	5.152
MSX2	LTR	ERVL	LTR16A2	51	6.5226e-09	2.68927e-05	2.571
GATA3	LTR	ERVL-MaLR	MLT1A1	36	6.9882e-09	2.88123e-05	0.431
TFAP2C	LTR	ERV1	HERVE-int	18	7.0177e-09	2.8934e-05	5.925
ARID1A	LTR	ERV1	LTR75_1	14	7.5119e-09	3.09716e-05	8.272
ARID1A	LTR	ERVL-MaLR	MSTD	53	7.7145e-09	3.18069e-05	0.491
SMARCA4	LTR	ERVK	HERVK11D-int	12	8.1915e-09	3.37736e-05	11.661
SMARCA4	LTR	ERVL-MaLR	MLT1H	80	8.7737e-09	3.6174e-05	0.554
MSX2	LTR	ERVK	HERVKC4-int	11	9.4909e-09	3.9131e-05	12.554
MSX2	LTR	ERVK	MER9B	8	9.595e-09	3.95602e-05	24.045
MSX2	LTR	ERVL-MaLR	MLT1A1	31	1.0351e-08	4.26772e-05	0.409
TFAP2A	LTR	ERV1	LTR49	25	1.1116e-08	4.58313e-05	4.059
GATA3	LTR	ERV1	MER65C	29	1.1298e-08	4.65817e-05	3.412
GATA3	LTR	ERV1	LTR38	18	1.1982e-08	4.94018e-05	5.742
ARID1A	LTR	ERV1	MER61C	21	1.2665e-08	5.22178e-05	4.845
TFAP2C	LTR	ERVL-MaLR	MLT1A0	18	1.3659e-08	5.63161e-05	0.328
GATA3	LTR	ERV1	LTR24B	23	1.4515e-08	5.98453e-05	4.374
GATA2	LTR	ERVK	HERVK3-int	13	1.4978e-08	6.17543e-05	8.391
ARID1A	LTR	ERVL-MaLR	MLT1A	67	1.4979e-08	6.17584e-05	0.532
TFAP2A	LTR	ERVK	HERVK22-int	19	1.5079e-08	6.21707e-05	5.275
GATA2	LTR	ERV1	LTR36	12	1.5315e-08	6.31437e-05	9.319
GATA3	LTR	ERVK	HERVK14-int	28	1.5685e-08	6.46693e-05	3.717
TFAP2A	LTR	ERV1	MER49	25	1.5851e-08	6.53537e-05	3.988
ARID1A	LTR	ERV1	Harlequin-int	42	1.599e-08	6.59268e-05	2.813
TFAP2C	LTR	ERV1	MER51C	9	1.6863e-08	6.95261e-05	15.338
TFAP2C	LTR	ERV1	LTR38A1	8	1.7e-08	7.0091e-05	19.522
ARID1A	LTR	ERV1	MER61F	15	1.7258e-08	7.11547e-05	7.041
TFAP2A	LTR	ERV1	MER4CL34	19	1.7392e-08	7.17072e-05	5.15
TFAP2A	LTR	ERV1	HERVIP10F-int	19	1.9474e-08	8.02913e-05	5.212
GATA3	LTR	ERV1	LTR46	16	2.1023e-08	8.66778e-05	5.497
TFAP2C	LTR	ERV1	LTR34	10	2.1765e-08	8.97371e-05	12.192
ARID1A	LTR	ERV1	LTR21A	12	2.178e-08	8.97989e-05	9.559
TFAP2A	LTR	Gypsy	MamGypLTR1c	19	2.2114e-08	9.1176e-05	5.057
GATA2	LTR	ERV1	LTR23	12	2.26e-08	9.31798e-05	7.344
GATA2	LTR	ERV1	MER61F	8	2.3215e-08	9.57154e-05	18.796
GATA2	LTR	ERV1	LTR29	13	2.43e-08	0.000100189	7.93
MSX2	LTR	ERV1	LTR24C	20	2.4998e-08	0.000103067	4.844
TFAP2C	LTR	ERVL	LTR16A1	26	2.6572e-08	0.000109556	3.744
MSX2	LTR	ERVL	LTR47A2	16	2.6844e-08	0.000110678	6.164
TFAP2A	LTR	ERV1	LTR72	9	2.6912e-08	0.000110958	14.596
GATA2	LTR	ERV1	LTR59	6	2.8276e-08	0.000116582	21.047
SMARCA4	LTR	ERV1	LTR12C	30	2.8282e-08	0.000116607	0.412
TFAP2C	LTR	ERVK	HERVK11-int	15	3.0163e-08	0.000124362	6.576
TFAP2C	LTR	ERVL-MaLR	MSTA	20	3.143e-08	0.000129586	0.354
TFAP2C	LTR	ERVL	LTR40A1	12	3.4161e-08	0.000140846	8.628
GATA3	LTR	ERVL-MaLR	MLT1K	274	3.422e-08	0.000141089	1.426
ARID1A	LTR	ERV1	LTR24B	24	3.4461e-08	0.000142083	4.019
ARID1A	LTR	ERVK	HERVK14-int	26	3.5797e-08	0.000147591	3.777
ARID1A	LTR	ERV1	MER61D	19	3.837e-08	0.0001582	5.001
MSX2	LTR	ERV1	LTR38A1	13	3.8443e-08	0.0001585	7.862
ARID1A	LTR	ERV1	MER52A	8	3.8524e-08	0.000158834	0.218
GATA3	LTR	ERV1	MER34C_	28	4.0717e-08	0.000167876	3.5
SMARCA4	LTR	ERVL	MER77	49	4.1364e-08	0.000170544	2.46
ARID1A	LTR	ERV1	MER4E1	42	4.2346e-08	0.000174593	2.673
GATA3	LTR	ERV1	LTR64	20	4.3319e-08	0.000178604	4.68
SMARCA4	LTR	ERV1	LTR34	19	4.5939e-08	0.000189406	4.945
MSX2	LTR	ERV1	LTR24B	21	4.7458e-08	0.000195669	4.43
GATA3	LTR	ERV1	LTR26C	19	4.9022e-08	0.000202118	4.898
SMARCA4	LTR	ERV1	MER51C	16	5.0205e-08	0.000206995	5.952
ARID1A	LTR	ERVL-MaLR	MLT1A1	47	5.0575e-08	0.000208521	0.489
GATA2	LTR	ERV1	MER84-int	8	5.7157e-08	0.000235658	16.746
GATA3	LTR	ERV1	LTR38C	13	6.0052e-08	0.000247594	7.635
TFAP2C	LTR	ERVK	LTR22B1	8	6.2186e-08	0.000256393	16.517
GATA2	LTR	ERV1	LTR6B	8	6.5897e-08	0.000271693	16.356
GATA3	LTR	ERVL-MaLR	THE1C-int	20	7.0362e-08	0.000290103	0.357
MSX2	LTR	ERVK	LTR13A	17	8.3865e-08	0.000345775	5.364
GATA2	LTR	ERV1	MER51C	8	9.4188e-08	0.000388337	15.515
ARID1A	LTR	ERV1	PRIMA41-int	30	9.4344e-08	0.00038898	3.223
MSX2	LTR	ERV1	MER4A1	57	9.5073e-08	0.000391986	2.226
TFAP2C	LTR	ERVK	HERVK22-int	16	9.609e-08	0.000396179	5.548
GATA2	LTR	ERV1	LTR19B	9	1.0089e-07	0.000415969	12.306
MSX2	LTR	ERV1	MER67C	46	1.0271e-07	0.000423473	2.455
GATA3	LTR	ERV1	LTR58	10	1.0379e-07	0.000427926	10.834
TFAP2A	LTR	ERVL-MaLR	MSTD	5	1.1553e-07	0.00047633	0.171
ARID1A	LTR	ERV1	LTR10D	15	1.2519e-07	0.000516158	5.975
SMARCA4	LTR	ERV1	LTR19-int	17	1.2998e-07	0.000535908	5.222
TFAP2C	LTR	ERV1	HERV1_LTRc	5	1.3069e-07	0.000538835	49.37
GATA2	LTR	ERV1	HERVH-int	66	1.3438e-07	0.000554049	2.059
TFAP2C	LTR	Gypsy	MamGypLTR1c	15	1.3569e-07	0.00055945	5.724
ARID1A	LTR	ERVL-MaLR	MLT1D	360	1.3844e-07	0.000570788	1.342
ARID1A	LTR	ERVL	LTR16A2	56	1.3866e-07	0.000571695	2.219
TFAP2C	LTR	ERVL-MaLR	MSTB	3	1.3948e-07	0.000575076	0.122
GATA2	LTR	ERVL-MaLR	MLT1E2	32	1.4197e-07	0.000585342	2.966
GATA3	LTR	ERV1	MER41D	22	1.4666e-07	0.000604679	3.968
MSX2	LTR	ERV1	LTR7B	30	1.4855e-07	0.000612472	3.12
GATA2	LTR	ERV1	LTR12C	1	1.501e-07	0.000618862	0.051
GATA3	LTR	ERV1	LTR24C	20	1.5255e-07	0.000628964	4.316
GATA3	LTR	ERV1	MER52D	0	1.6273e-07	0.000670936	0
GATA3	LTR	ERVL	MLT2B5	18	1.8054e-07	0.000744366	4.222
MSX2	LTR	ERV1	LTR56	32	1.9905e-07	0.000820683	2.943
TFAP2A	LTR	ERVL-MaLR	MLT1A1	4	2.0141e-07	0.000830413	0.153
SMARCA4	LTR	ERVL	ERVL-B4-int	34	2.1148e-07	0.000871932	0.452
MSX2	LTR	ERV1	LTR6A	17	2.2494e-07	0.000927428	4.926
MSX2	LTR	ERVL	MER21-int	35	2.5164e-07	0.00103751	2.761
ARID1A	LTR	ERVL-MaLR	MSTB1	28	2.6239e-07	0.00108183	0.426
MSX2	LTR	ERVL-MaLR	MSTB1	19	2.676e-07	0.00110331	0.363
MSX2	LTR	ERV1	LTR34	16	2.6846e-07	0.00110686	5.17
SMARCA4	LTR	ERV1	PRIMA4_LTR	20	2.8036e-07	0.00115592	4.166
MSX2	LTR	ERVK	HERVK14C-int	11	2.9524e-07	0.00121727	8.812
TFAP2A	LTR	ERVK	LTR14	7	2.9883e-07	0.00123208	17.663
ARID1A	LTR	ERV1	LTR37A	56	3.2407e-07	0.00133614	2.166
GATA3	LTR?	MamRep605b	MamRep605b	50	3.676e-07	0.00151561	2.253
GATA3	LTR	ERVL	LTR47B2	13	3.866e-07	0.00159395	6.389
GATA3	LTR	ERVL	HERVL-int	149	3.8921e-07	0.00160471	1.583
TFAP2A	LTR	ERV1	LTR19C	8	4.0681e-07	0.00167728	12.907
GATA2	LTR	ERV1	MER39B	15	4.0684e-07	0.0016774	4.591
MSX2	LTR	ERVL-MaLR	MSTD	42	4.1251e-07	0.00170078	0.494
TFAP2C	LTR	ERV1	LTR2	15	4.1447e-07	0.00170886	5.243
GATA2	LTR	ERVK	HERVK14C-int	7	4.348e-07	0.00179268	17.215
TFAP2C	LTR	ERVL	LTR47A2	7	4.4404e-07	0.00183078	10.913
GATA3	LTR	ERV1	MER34C2	24	4.6207e-07	0.00190511	3.449
ARID1A	LTR	ERV1	MER34B-int	28	4.6345e-07	0.0019108	3.096
GATA3	LTR	ERVL?	LTR89B	24	4.6447e-07	0.00191501	3.437
MSX2	LTR	ERV1	LTR10D	13	4.6466e-07	0.00191579	6.276
GATA3	LTR	ERV1	MER92C	10	4.7267e-07	0.00194882	7.025
ARID1A	LTR	ERVL	HERVL32-int	13	4.8759e-07	0.00201033	6.348
MSX2	LTR	ERVL-MaLR	MLT1D	292	4.8829e-07	0.00201322	1.366
GATA3	LTR	ERV1	LTR56	32	4.8944e-07	0.00201796	2.682
GATA3	LTR	ERV1	LTR10D	14	5.1229e-07	0.00211217	5.728
TFAP2C	LTR	ERV1	LTR72	6	5.2558e-07	0.00216697	13.492
ARID1A	LTR	ERVL-MaLR	THE1A-int	11	5.4418e-07	0.00224365	0.285
MSX2	LTR	ERV1	MER65D	19	6.1093e-07	0.00251886	4.099
TFAP2A	LTR	ERVL	MLT2A2	1	6.1663e-07	0.00254237	0.056
ARID1A	LTR	ERV1	LTR56	36	6.2278e-07	0.00256772	2.607
GATA2	LTR	ERVL	MER74A	18	6.2963e-07	0.00259596	4.235
GATA2	LTR	ERVL-MaLR	MLT1B-int	11	6.443e-07	0.00265645	7.289
GATA3	LTR	ERVL	LTR82B	36	6.5394e-07	0.00269619	2.598
GATA3	LTR	ERV1	LTR15	16	6.8067e-07	0.0028064	4.822
TFAP2A	LTR	ERVK	LTR22B1	8	6.9696e-07	0.00287357	11.953
SMARCA4	LTR	ERVL	MLT2B4	28	7.1214e-07	0.00293615	0.435
MSX2	LTR	ERVL-MaLR	MLT1A	53	7.5094e-07	0.00309613	0.537
GATA3	LTR	ERVL	LTR80B	21	7.6085e-07	0.00313698	3.411
TFAP2A	LTR	ERVK	HERVK11-int	15	8.036e-07	0.00331324	5.06
SMARCA4	LTR	ERV1	MER61F	13	8.6036e-07	0.00354726	5.968
GATA2	LTR	ERVL-MaLR	MLT1A0	18	9.2481e-07	0.00381299	0.376
MSX2	LTR	ERV1	HERVH-int	67	9.3895e-07	0.00387129	0.572
TFAP2A	LTR	ERV1	MER52A	0	9.576e-07	0.00394818	0
ARID1A	LTR	ERV1	MER84-int	13	9.7543e-07	0.0040217	5.929
TFAP2C	LTR	ERVK	LTR14	6	9.7554e-07	0.00402215	20.065
TFAP2A	LTR	ERVL	LTR16E1	26	9.9205e-07	0.00409022	2.895
SMARCA4	LTR	ERVL	HERVL-int	33	1.0082e-06	0.00415681	0.463
GATA3	LTR	ERV1	MER34B	26	1.0639e-06	0.00438646	3.105
GATA2	LTR	ERVL	LTR47A	11	1.1765e-06	0.00485071	6.831
GATA3	LTR	ERV1	LTR10G	11	1.1859e-06	0.00488947	7.122
GATA2	LTR	ERVL	MLT2C1	20	1.3149e-06	0.00542133	3.674
ARID1A	LTR	ERV1	HERV1_I-int	10	1.4041e-06	0.0057891	8.761
GATA2	LTR	ERV1	MER34B-int	11	1.4277e-06	0.00588641	6.699
TFAP2A	LTR	ERVL	MLT2A1	0	1.446e-06	0.00596186	0
TFAP2C	LTR	ERVK	LTR5B	13	1.4694e-06	0.00605834	5.514
TFAP2C	LTR	ERV1	MER61F	7	1.4898e-06	0.00614245	13.519
SMARCA4	LTR	ERV1	MER41-int	64	1.562e-06	0.00644013	1.969
GATA2	LTR	ERV1	LTR24B	9	1.6053e-06	0.00661865	8.706
ARID1A	LTR	ERV1	HERVIP10FH-int	26	1.6843e-06	0.00694437	3.057
SMARCA4	LTR	ERV1	LTR48B	37	1.7556e-06	0.00723834	2.466
SMARCA4	LTR	ERV1	MER41D	22	1.7587e-06	0.00725112	3.402
TFAP2A	LTR	ERVK	LTR5B	15	1.7666e-06	0.00728369	4.686
SMARCA4	LTR	ERV1	MER57-int	5	1.7881e-06	0.00737234	0.192
GATA2	LTR	ERVK	LTR5B	12	1.8403e-06	0.00758756	5.902
GATA3	LTR	ERV1	LTR78	98	2.006e-06	0.00827074	1.683
ARID1A	LTR	ERV1	LTR26E	11	2.0112e-06	0.00829218	6.712
ARID1A	LTR	ERV1	MER72	32	2.0196e-06	0.00832681	2.641
GATA2	LTR	ERV1	MER61-int	21	2.1183e-06	0.00873375	3.441
ARID1A	LTR	ERVL-MaLR	MLT1B-int	25	2.1634e-06	0.0089197	3.068
GATA3	LTR	ERVL-MaLR	MSTD	51	2.403e-06	0.00990757	0.546
GATA3	LTR	ERV1	MER83	20	2.4506e-06	0.0101038	3.574
GATA2	LTR	ERV1	MER34A	15	2.4805e-06	0.0102271	4.508
TFAP2A	LTR	ERVL	LTR40a	25	2.5188e-06	0.010385	3.004
MSX2	LTR	ERV1	LTR21A	9	2.6601e-06	0.0109676	8.529
ARID1A	LTR	ERV1	HERV9-int	31	2.6631e-06	0.01098	2.715
ARID1A	LTR	ERVL	MER21-int	37	2.6884e-06	0.0110843	2.415
GATA2	LTR	ERVL	LTR108a_Mam	5	2.7028e-06	0.0111436	24.96
ARID1A	LTR	ERV1	HERVP71A-int	19	2.7139e-06	0.0111894	3.778
GATA3	LTR	ERV1	MER34B-int	25	2.7411e-06	0.0113016	3.019
MSX2	LTR	ERV1	MER67D	31	2.9588e-06	0.0121991	2.627
TFAP2C	LTR	ERVL	LTR16E1	20	3.1658e-06	0.0130526	3.177
SMARCA4	LTR	ERVL	ERVL-E-int	91	3.2443e-06	0.0133762	0.631
MSX2	LTR	ERV1	HERVIP10F-int	24	3.338e-06	0.0137626	3.115
ARID1A	LTR	Gypsy	MamGypLTR1c	36	3.4751e-06	0.0143278	2.415
TFAP2A	LTR	Gypsy?	LTR88b	17	3.4927e-06	0.0144004	3.527
GATA3	LTR	ERVL	MER68B	19	3.5077e-06	0.0144622	3.303
MSX2	LTR	ERV1	LTR48B	31	3.631e-06	0.0149706	2.601
SMARCA4	LTR	ERVL-MaLR	MLT1H2	30	3.6373e-06	0.0149966	0.466
GATA3	LTR	ERVL-MaLR	THE1C	80	3.6908e-06	0.0152172	0.617
GATA2	LTR	ERV1	MER101B	7	3.7541e-06	0.0154782	11.602
TFAP2A	LTR	ERV1	LTR2	16	3.9776e-06	0.0163996	4.102
ARID1A	LTR	ERV1	HERV1_LTRa	6	3.9954e-06	0.016473	17.35
GATA2	LTR	ERV1	MER49	16	4.0104e-06	0.0165349	4.087
MSX2	LTR?	MER129	MER129	9	4.0994e-06	0.0169018	7.953
MSX2	LTR	ERV1	MER61F	11	4.1763e-06	0.0172189	6.149
SMARCA4	LTR	ERV1	LTR38A1	12	4.2353e-06	0.0174621	5.557
GATA2	LTR	ERV1	LTR19C	6	4.2534e-06	0.0175368	15.287
GATA3	LTR	ERVL-MaLR	MLT1J-int	40	4.4283e-06	0.0182579	2.255
TFAP2C	LTR	ERV1	HERV9-int	18	4.4313e-06	0.0182702	3.736
SMARCA4	LTR	ERV1	LTR10D	13	4.5193e-06	0.0186331	5.076
MSX2	LTR	ERV1	LTR64	16	4.6023e-06	0.0189753	4.096
MSX2	LTR	ERV1	LTR4	9	4.9573e-06	0.0204389	7.879
TFAP2C	LTR	ERV1	LTR19B	8	5.0482e-06	0.0208137	8.975
ARID1A	LTR	ERV1	MER65D	20	5.3864e-06	0.0222081	3.384
SMARCA4	LTR	ERVL	ERV3-16A3_I-int	68	5.8408e-06	0.0240816	0.597
MSX2	LTR	ERV1	LTR38C	10	5.9966e-06	0.024724	6.63
TFAP2C	LTR	ERV1	MER61C	8	6.1619e-06	0.0254055	8.709
GATA3	LTR	ERVL	LTR40b	33	6.2528e-06	0.0257803	2.469
MSX2	LTR	ERV1	MER61C	15	6.2928e-06	0.0259452	4.235
GATA3	LTR	ERV1	LTR26E	10	6.6204e-06	0.0272959	6.581
GATA3	LTR	ERV1	LTR75_1	10	7.771e-06	0.0320398	6.433
SMARCA4	LTR	ERV1	HERV17-int	43	8.006e-06	0.0330087	2.171
MSX2	LTR	ERV1	LTR51	18	8.0243e-06	0.0330842	3.558
GATA2	LTR	ERVL-MaLR	THE1C	6	8.328e-06	0.0343363	0.239
TFAP2C	LTR	ERVK	HERVK9-int	20	8.5685e-06	0.0353279	3.256
GATA3	LTR	ERV1	LTR45C	18	9.254e-06	0.0381542	3.191
GATA3	LTR	ERV1	MER34	36	9.292e-06	0.0383109	2.325
GATA3	LTR	ERVL-MaLR	MLT1F2	123	9.2986e-06	0.0383381	1.524
TFAP2A	LTR	ERV1	MER61F	7	9.62e-06	0.0396633	10.139
TFAP2A	LTR	ERV1	HERV9NC-int	17	9.8894e-06	0.040774	3.711
GATA2	LTR	ERV1	MER65D	8	9.9667e-06	0.0410927	8.108
ARID1A	LTR	ERVK	LTR22C0	10	1.0689e-05	0.0440707	6.249
MSX2	LTR	ERV1	LTR6B	11	1.1152e-05	0.0459797	5.516
GATA3	LTR	ERV1	HERVIP10FH-int	27	1.1475e-05	0.0473114	2.674
TFAP2A	LTR	ERVL-MaLR	MLT1A	11	1.2147e-05	0.0500821	0.328
GATA3	LTR	ERV1	HUERS-P1-int	31	1.2421e-05	0.0512118	2.486
ARID1A	LTR	ERV1	LTR24C	18	1.2749e-05	0.0525641	3.44
TFAP2A	LTR	ERV1	LTR6A	9	1.2763e-05	0.0526218	6.743
SMARCA4	LTR	ERVL	LTR42	16	1.3477e-05	0.0555657	3.765
MSX2	LTR	ERVK	LTR22C0	9	1.4405e-05	0.0593918	6.82
TFAP2A	LTR	ERVL-MaLR	THE1A	2	1.4418e-05	0.0594454	0.116
TFAP2A	LTR	ERVL	HERVL32-int	7	1.456e-05	0.0600309	9.55
SMARCA4	LTR	ERV1	LTR24C	18	1.5696e-05	0.0647146	3.385
GATA3	LTR	ERVK	HERVK-int	29	1.5884e-05	0.0654897	2.623
MSX2	LTR	ERVL	LTR42	14	1.6171e-05	0.066673	4.138
MSX2	LTR	ERVL	LTR40A1	19	1.62e-05	0.0667926	3.228
TFAP2C	LTR	ERVL	LTR33	47	1.6385e-05	0.0675554	2.011
MSX2	LTR	ERV1	MER4E1	31	1.6944e-05	0.0698601	2.412
TFAP2C	LTR	ERV1	LTR49	16	1.7099e-05	0.0704992	3.623
GATA3	LTR	ERVL-MaLR	MLT1A0	183	1.7433e-05	0.0718763	0.736
GATA3	LTR	ERV1	MER34A1	25	1.8253e-05	0.0752571	2.683
MSX2	LTR	ERV1	MER72	26	1.8593e-05	0.0766589	2.622
TFAP2A	LTR	ERV1	MER84-int	7	1.9687e-05	0.0811695	9.082
ARID1A	LTR	ERV1	LTR38A1	11	1.9993e-05	0.0824311	5.159
ARID1A	LTR	ERV1	LTR72	11	2.0023e-05	0.0825548	5.169
GATA2	LTR	ERV1	MER41D	7	2.015e-05	0.0830784	6.405
MSX2	LTR	Gypsy	MamGypLTR1c	28	2.0943e-05	0.086348	2.42
GATA2	LTR	ERV1	LTR75_1	5	2.1292e-05	0.0877869	16.011
ARID1A	LTR	ERV1	LTR48B	34	2.1388e-05	0.0881827	2.289
TFAP2C	LTR	ERV1	LTR27B	6	2.1807e-05	0.0899103	11.356
GATA3	LTR	ERVL-MaLR	MLT1O	82	2.2244e-05	0.091712	1.665
GATA2	LTR	ERV1	MER34A1	9	2.2288e-05	0.0918934	4.942
MSX2	LTR	ERV1	LTR26C	14	2.2951e-05	0.094627	3.999
ARID1A	LTR	ERVL-MaLR	MLT1I	97	2.2967e-05	0.0946929	0.664
SMARCA4	LTR	ERV1	LTR56	33	2.3466e-05	0.0967503	2.335
MSX2	LTR	ERVK	HERVK9-int	37	2.3648e-05	0.0975007	2.207
GATA3	LTR	ERVL	LTR16A1	58	2.3865e-05	0.0983954	1.837
GATA3	LTR	ERVK	MER9a3	23	2.3923e-05	0.0986345	2.782
SMARCA4	LTR	ERV1	LTR4	9	2.3952e-05	0.0987541	6.431
SMARCA4	LTR	ERV1	MER49	43	2.3959e-05	0.098783	2.058
GATA3	LTR	ERV1	LTR12D	0	2.3974e-05	0.0988448	0
SMARCA4	LTR	ERV1	MER61C	16	2.4182e-05	0.0997024	3.579
TFAP2A	LTR	ERV1	MER34B-int	12	2.429e-05	0.100148	4.523
ARID1A	LTR	ERV1	LTR76	13	2.4456e-05	0.100832	4.288
MSX2	LTR	ERV1	HERV1_LTRa	5	2.5617e-05	0.105619	16.959
SMARCA4	LTR	ERV1	HERVIP10F-int	23	2.6857e-05	0.110731	2.796
GATA2	LTR	ERVL	MER21B	23	2.6948e-05	0.111107	2.726
GATA3	LTR	ERV1	LTR76	13	2.6951e-05	0.111119	4.245
ARID1A	LTR	Gypsy?	LTR88b	42	2.7725e-05	0.11431	2.082
ARID1A	LTR	ERV1	MER50-int	26	2.7876e-05	0.114933	2.573
SMARCA4	LTR	ERVL	LTR16A2	50	2.7973e-05	0.115333	1.934
SMARCA4	LTR	ERV1	LOR1-int	6	2.8008e-05	0.115477	0.248
GATA3	LTR	ERV1	MER57-int	9	2.8117e-05	0.115926	0.307
SMARCA4	LTR	ERV1	LTR64	16	2.8349e-05	0.116883	3.158
TFAP2A	LTR	ERVL	LTR33	60	2.8396e-05	0.117077	1.797
TFAP2C	LTR	ERVL-MaLR	MLT1A1	3	2.9919e-05	0.123356	0.163
ARID1A	LTR	ERV1	LTR8A	45	2.9968e-05	0.123558	2.002
GATA2	LTR	ERVL-MaLR	MSTB	5	3.0232e-05	0.124647	0.233
SMARCA4	LTR	ERV1	LTR24B	19	3.0937e-05	0.127553	3.085
GATA3	LTR	ERV1	LTR54	30	3.1583e-05	0.130217	2.361
TFAP2C	LTR	ERV1	HERV9N-int	11	3.2394e-05	0.13356	4.849
SMARCA4	LTR	ERV1	HERVIP10FH-int	23	3.3346e-05	0.137486	2.736
GATA3	LTR	ERV1	LTR1A2	2	3.356e-05	0.138368	0.125
GATA3	LTR	ERVL	MLT2C2	33	3.4319e-05	0.141497	2.255
TFAP2A	LTR	ERV1	MER4D0	10	3.4916e-05	0.143959	5.234
TFAP2A	LTR	ERVL-MaLR	THE1B-int	19	3.665e-05	0.151108	0.429
ARID1A	LTR	ERVL	LTR47B2	11	3.6819e-05	0.151805	4.813
GATA2	LTR	ERVK	HERVK11-int	10	3.7473e-05	0.154501	5.229
ARID1A	LTR	ERV1	MER49	42	3.8315e-05	0.157973	2.027
GATA2	LTR	ERV1	LTR51	8	3.89e-05	0.160385	6.685
TFAP2C	LTR	ERVL	LTR16	22	4.0037e-05	0.165073	2.724
TFAP2C	LTR	ERVL-MaLR	THE1D	14	4.0324e-05	0.166256	0.384
ARID1A	LTR	ERVL-MaLR	MLT1A-int	20	4.0441e-05	0.166738	2.925
GATA2	LTR	ERVL-MaLR	THE1A	0	4.1302e-05	0.170288	0
TFAP2A	LTR	ERVK	LTR22	5	4.1357e-05	0.170515	14.18
TFAP2C	LTR	ERV1	MER52A	0	4.2459e-05	0.175058	0
TFAP2C	LTR	ERV1	MER50	23	4.3237e-05	0.178266	2.642
MSX2	LTR	ERVK	LTR3B	7	4.3992e-05	0.181379	8.169
MSX2	LTR	ERV1	LTR37A	41	4.4323e-05	0.182744	2.04
MSX2	LTR	ERV1	MER49	36	4.4917e-05	0.185193	2.136
TFAP2A	LTR	ERVL	LTR16E2	23	4.6381e-05	0.191229	2.63
TFAP2A	LTR	ERV1	LTR48	14	4.6515e-05	0.191781	3.262
TFAP2C	LTR	ERVL-MaLR	MLT1B	21	4.6518e-05	0.191794	0.453
GATA3	LTR	ERV1	LTR12	2	4.6596e-05	0.192115	0.129
GATA3	LTR	ERV1	MER4-int	86	4.6687e-05	0.192491	1.608
TFAP2A	LTR	ERV1	MER67B	10	4.8646e-05	0.200567	5.021
ARID1A	LTR	ERVK	MER9a2	16	4.8832e-05	0.201334	3.37
ARID1A	LTR	ERV1	MER4D0	19	5.1202e-05	0.211106	2.969
GATA2	LTR	ERV1	LTR38B	6	5.195e-05	0.21419	9.623
SMARCA4	LTR	ERVK	HERVK14-int	20	5.2254e-05	0.215443	2.879
ARID1A	LTR	ERV1	LTR6A	15	5.281e-05	0.217736	3.514
TFAP2A	LTR	ERV1	HERVIP10FH-int	13	5.4175e-05	0.223364	3.899
MSX2	LTR	ERV1	HERV1_I-int	8	5.4309e-05	0.223916	7.077
GATA3	LTR	ERV1	LTR25	12	5.5199e-05	0.227585	4.229
GATA3	LTR	ERVL	ERV3-16A3_LTR	29	5.6796e-05	0.23417	2.317
MSX2	LTR	ERV1	MER65C	21	6.0834e-05	0.250819	2.74
ARID1A	LTR	ERVL	LTR47A2	13	6.2547e-05	0.257881	3.873
SMARCA4	LTR	ERV1	LTR36	20	6.3193e-05	0.260545	2.826
SMARCA4	LTR	ERV1	HERV1_I-int	8	6.6652e-05	0.274806	6.866
ARID1A	LTR	ERV1	LTR49	43	6.67e-05	0.275004	1.956
SMARCA4	LTR	ERV1	HERVE_a-int	16	6.7233e-05	0.277202	3.34
GATA2	LTR	ERVL-MaLR	THE1D-int	1	6.8755e-05	0.283477	0.076
ARID1A	LTR	ERVK	MER11C	39	6.9383e-05	0.286066	2.063
GATA3	LTR	ERVL-MaLR	MLT1M	43	7.082e-05	0.291991	1.945
GATA3	LTR	ERVL-MaLR	MLT1E1A	73	7.6229e-05	0.314292	1.658
MSX2	LTR	ERV1	LTR1A2	1	8.4501e-05	0.348398	0.079
TFAP2C	LTR	ERV1	LTR7B	11	8.456e-05	0.348641	4.269
SMARCA4	LTR	ERVL-MaLR	MLT1C	58	8.9659e-05	0.369664	0.614
GATA3	LTR	ERV1	MER66C	19	9.0374e-05	0.372612	2.827
SMARCA4	LTR	ERV1	LTR26E	9	9.1065e-05	0.375461	5.322
TFAP2A	LTR	ERV1	LTR38B	7	9.3221e-05	0.38435	6.982
GATA2	LTR	ERV1	MER34C2	8	9.6639e-05	0.398443	5.837
GATA2	LTR	ERV1	HERV9-int	13	9.7197e-05	0.400743	3.691
MSX2	LTR	ERVL	MLT2B4	24	9.8758e-05	0.407179	0.485
TFAP2A	LTR	ERVL-MaLR	MLT1M	19	0.00010059	0.414733	2.779
SMARCA4	LTR	ERV1	LTR21A	8	0.00010313	0.425205	6.006
GATA3	LTR	Gypsy?	LTR88b	33	0.00010883	0.448706	2.119
TFAP2C	LTR	ERV1	MER4CL34	11	0.00010959	0.45184	4.142
MSX2	LTR	ERV1	LTR7	52	0.00011032	0.454849	1.806
GATA3	LTR	ERVL?	LTR89	26	0.00011047	0.455468	2.355
GATA3	LTR	ERVK	LTR3B	7	0.00011063	0.456127	7.026
ARID1A	LTR	ERV1	LTR51	18	0.00011131	0.458931	2.888
TFAP2A	LTR	ERVK	MER9a3	11	0.0001123	0.463013	4.144
MSX2	LTR	ERVK	LTR22B1	9	0.00011745	0.484246	5.111
GATA3	LTR	ERV1	HERVE-int	28	0.00011805	0.48672	2.356
ARID1A	LTR	ERV1	LTR10B	7	0.00011848	0.488493	6.974
GATA3	LTR	ERVL	LTR108a_Mam	7	0.00011854	0.48874	6.899
GATA3	LTR	ERVL	LTR62	15	0.00012807	0.528033	3.226
TFAP2A	LTR	ERV1	HERV3-int	11	0.0001294	0.533516	4.116
GATA2	LTR	ERV1	LTR24	6	0.00013494	0.556358	8.034
TFAP2C	LTR	ERV1	MER4C	9	0.00013907	0.573386	4.874
MSX2	LTR	ERV1	LTR75_1	8	0.00013926	0.574169	5.664
MSX2	LTR	ERV1	MER50-int	22	0.00014037	0.578746	2.521
GATA2	LTR	ERVL-MaLR	MLT1E3	14	0.00014307	0.589878	2.933
SMARCA4	LTR	ERVL	ERVL-int	2	0.00014345	0.591444	0.137
SMARCA4	LTR	ERV1	MER84-int	10	0.000155	0.639065	4.462
GATA3	LTR	ERVL	LTR82A	29	0.0001581	0.651846	2.191
ARID1A	LTR	ERV1	LTR36	19	0.00015887	0.655021	2.709
MSX2	LTR	ERVL	LTR47B2	9	0.00015968	0.658361	4.878
TFAP2A	LTR	ERVL	MER77B	17	0.00016091	0.663432	2.868
ARID1A	LTR	ERVL	LTR42	14	0.00016286	0.671472	3.313
ARID1A	LTR	ERV1	MER51C	11	0.00017256	0.711465	4.009
ARID1A	LTR	ERVL-MaLR	MLT1H	98	0.00017517	0.722226	0.694
TFAP2A	LTR	ERV1	LTR8B	21	0.00017555	0.723793	2.517
SMARCA4	LTR	ERV1	MER65-int	4	0.00017831	0.735172	0.219
ARID1A	LTR	Gypsy?	LTR85a	44	0.00018112	0.746758	1.858
ARID1A	LTR	ERV1	MER67C	44	0.00018275	0.753478	1.858
GATA2	LTR	ERV1	MER52A	0	0.00018598	0.766796	0
MSX2	LTR	ERVK	MER9a1	14	0.00018794	0.774877	3.259
SMARCA4	LTR	ERV1	LTR12	2	0.00019192	0.791286	0.142
SMARCA4	LTR	ERV1	LTR26B	9	0.00019295	0.795533	4.778
SMARCA4	LTR	ERVK	HERVK14C-int	8	0.00019465	0.802542	5.661
GATA2	LTR	ERVL-MaLR	MSTD	4	0.00019576	0.807118	0.223
ARID1A	LTR	ERV1	MER61-int	46	0.00019963	0.823074	1.824
SMARCA4	LTR	ERVL	LTR47B2	10	0.00020188	0.832351	4.283
SMARCA4	LTR	ERV1	PRIMA41-int	23	0.00020253	0.835031	2.464
ARID1A	LTR	ERVL	MLT2B4	35	0.00020513	0.845751	0.556
GATA3	LTR	ERVL	MLT2B1	86	0.00020529	0.846411	1.542
ARID1A	LTR?	MER129	MER129	8	0.00021187	0.87354	5.322
GATA2	LTR	ERVL	LTR16A1	17	0.00022343	0.921202	2.78
SMARCA4	LTR	ERVL	MLT2B2	13	0.00023145	0.954268	0.403
TFAP2A	LTR	ERV1	HERV9N-int	11	0.00023291	0.960288	3.86
GATA2	LTR	ERV1	MER92B	9	0.00023605	0.973234	4.528
TFAP2C	LTR	ERVK	MER9B	3	0.00023969	0.988242	27.541
ARID1A	LTR	ERV1	LTR26C	14	0.00024132	0.994962	3.18
MSX2	LTR	ERV1	ERV24B_Prim-int	16	0.00024197	0.997642	2.906
GATA2	LTR	ERV1	LTR4	4	0.00024874	1	13.938
ARID1A	LTR	ERV1	LTR64	15	0.00025751	1	3.01
ARID1A	LTR	ERV1	LTR19C	9	0.00025828	1	4.603
GATA2	LTR	ERV1	LTR64	6	0.00025908	1	7.096
ARID1A	LTR	ERV1	MER65C	23	0.00025919	1	2.384
SMARCA4	LTR	ERVL	MLT2B1	37	0.00025945	1	0.569
GATA2	LTR	ERVL-MaLR	THE1C-int	1	0.00026336	1	0.088
SMARCA4	LTR	ERVL-MaLR	MLT1E1A	26	0.00026459	1	0.514
TFAP2C	LTR	ERV1	MER49	14	0.00027144	1	3.1
MSX2	LTR	ERVL	LTR47B3	7	0.00027179	1	5.944
TFAP2A	LTR	ERVL?	Eutr10	12	0.00027574	1	3.464
GATA3	LTR	ERV1	LTR10B1	9	0.00027869	1	4.521
SMARCA4	LTR	ERV1	LTR26C	14	0.0002807	1	3.132
MSX2	LTR	ERVL-MaLR	MLT1A-int	16	0.00028076	1	2.858
GATA2	LTR	ERVL	LTR80B	7	0.00028707	1	5.744
GATA3	LTR	ERVL	LTR79	66	0.00030523	1	1.608
TFAP2A	LTR	ERVL-MaLR	MLT1I	16	0.00030888	1	0.44
GATA3	LTR	Gypsy	MamGypsy2-I	48	0.00031882	1	1.775
SMARCA4	LTR	LTR90A	LTR90A	15	0.00033772	1	2.926
TFAP2A	LTR	Gypsy?	LTR85a	15	0.00033796	1	2.605
ARID1A	LTR	ERV1	HERVE_a-int	15	0.00034561	1	2.986
TFAP2C	LTR	ERVL-MaLR	MSTD	6	0.00034578	1	0.292
MSX2	LTR	ERV1	LTR19C	8	0.00034775	1	4.937
MSX2	LTR	ERVL	LTR82A	26	0.00035054	1	2.2
TFAP2A	LTR	ERVL	MLT2B4	4	0.00035291	1	0.236
GATA3	LTR	ERV1	HERV1_LTRb	3	0.00035393	1	29.695
MSX2	LTR	ERVK	HERVK11D-int	7	0.00035875	1	6.028
SMARCA4	LTR	ERV1	LTR51	17	0.00035989	1	2.698
ARID1A	LTR	ERVL	LTR52	3	0.0003695	1	0.199
SMARCA4	LTR	ERVL	MLT2B3	27	0.00037041	1	0.531
GATA3	LTR	ERV1	LTR12F	0	0.00037827	1	0
GATA2	LTR	ERV1	LTR10G	4	0.00038292	1	12.364
SMARCA4	LTR	ERVL	LTR52	3	0.0003857	1	0.195
MSX2	LTR	ERVL	LTR82B	27	0.00039177	1	2.124
TFAP2A	LTR	ERV1	MER4C	10	0.00039638	1	3.845
TFAP2C	LTR	ERVL-MaLR	MSTC	0	0.0004006	1	0
TFAP2A	LTR	ERVL	LTR47A2	6	0.00040372	1	6.545
ARID1A	LTR	ERVL	LTR40c	21	0.00041076	1	2.461
GATA3	LTR	ERVL-MaLR	MLT1G	59	0.0004156	1	1.64
TFAP2A	LTR	ERVK	LTR3B	4	0.00041688	1	12.218
TFAP2A	LTR	ERVL	LTR108a_Mam	4	0.00041834	1	12.154
TFAP2C	LTR	ERV1	LTR59	4	0.00041945	1	12.059
GATA3	LTR	ERVL	LTR40c	19	0.00042174	1	2.491
TFAP2C	LTR	ERVL	LTR16A	25	0.00042996	1	2.227
SMARCA4	LTR	ERVL	LTR50	17	0.00043814	1	0.46
TFAP2A	LTR	ERV1	MER61C	7	0.00044086	1	5.365
GATA3	LTR	ERVL	LTR108b_Mam	5	0.00044528	1	8.573
MSX2	LTR	ERV1	MER4CL34	23	0.00044679	1	2.262
GATA3	LTR	ERV1	LTR26	21	0.00045632	1	2.417
TFAP2C	LTR	Gypsy	MamGypLTR1b	10	0.00047851	1	3.74
MSX2	LTR	ERV1	MER61D	11	0.00049402	1	3.5
SMARCA4	LTR	ERV1	LTR1A2	3	0.00050937	1	0.201
GATA2	LTR	ERV1	PRIMA41-int	9	0.0005159	1	4.072
ARID1A	LTR	ERV1	LTR1A2	3	0.00051772	1	0.2
GATA2	LTR	ERV1	LOR1a	9	0.00052024	1	4.053
MSX2	LTR	ERV1	MER72B	9	0.00052067	1	4.123
TFAP2A	LTR	ERV1	MER34A	15	0.00053865	1	2.767
TFAP2A	LTR	ERVL	LTR47B	3	0.00054233	1	20.442
GATA3	LTR?	MamRep1151	MamRep1151	3	0.00055264	1	0.2
ARID1A	LTR	ERVL	LTR86B2	12	0.00055442	1	3.236
MSX2	LTR	ERV1	LTR12D	0	0.00057446	1	0
GATA2	LTR	ERVL	LTR80A	6	0.0005768	1	6.083
TFAP2A	LTR	ERVL-MaLR	MSTB1	5	0.00057835	1	0.272
TFAP2A	LTR	ERV1	MER101B	6	0.00058431	1	6.091
GATA3	LTR	ERV1	MER87	9	0.00059494	1	4.055
MSX2	LTR	ERVK	HERVK14-int	16	0.00059963	1	2.666
MSX2	LTR	ERV1	PRIMA41-int	20	0.00060419	1	2.447
TFAP2A	LTR	Gypsy	LTR81	6	0.00061191	1	6.024
GATA3	LTR	ERVL	LTR16	59	0.00062851	1	1.614
MSX2	LTR	ERV1	LTR26E	7	0.00063114	1	5.137
MSX2	LTR	ERV1	MER51C	9	0.00063205	1	4.009
MSX2	LTR	ERV1	LTR8A	35	0.00063256	1	1.89
SMARCA4	LTR	ERVL-MaLR	MLT1G1	30	0.00068269	1	0.559
TFAP2C	LTR	Gypsy?	LTR88b	11	0.00069686	1	3.307
MSX2	LTR	ERV1	MER34B-int	18	0.00070378	1	2.449
SMARCA4	LTR	ERV1	LTR75_1	8	0.00070506	1	4.416
ARID1A	LTR	ERV1	MER51B	22	0.00070608	1	2.23
GATA3	LTR	ERVL	HERVL32-int	9	0.0007246	1	3.977
GATA2	LTR	ERVK	LTR22C	2	0.00073335	1	58.45
SMARCA4	LTR	ERVL	HERVL18-int	1	0.00073589	1	0.095
ARID1A	LTR	ERV1	LTR10B2	6	0.00073846	1	4.262
GATA3	LTR	ERVL-MaLR	MLT1C	52	0.00075664	1	0.64
MSX2	LTR	ERV1	HERV17-int	34	0.00076543	1	1.904
GATA3	LTR	ERV1	HERV3-int	20	0.00077434	1	2.375
GATA3	LTR	ERV1	HERV1_LTRa	4	0.00078779	1	10.945
SMARCA4	LTR	ERVL-MaLR	MLT1F2	60	0.00081449	1	0.658
GATA3	LTR	ERV1	MER92D	9	0.00081793	1	3.845
GATA3	LTR	ERVL	LTR16E2	47	0.00083504	1	1.688
GATA3	LTR	ERVL-MaLR	MSTB2	7	0.00083685	1	0.333
GATA3	LTR	ERVL	LTR42	12	0.00085175	1	3.075
SMARCA4	LTR	Gypsy?	LTR88b	38	0.00087447	1	1.822
GATA3	LTR	ERVK	LTR22C2	6	0.00088066	1	5.812
GATA3	LTR	ERV1	PrimLTR79	6	0.0008886	1	4.1
GATA2	LTR	ERV1	MER61D	5	0.00090515	1	6.989
TFAP2C	LTR	ERV1	LTR38B	5	0.00091724	1	6.98
GATA2	LTR	ERV1	HERVIP10F-int	9	0.00091888	1	3.766
SMARCA4	LTR	ERV1	HERV1_LTRa	4	0.00092098	1	10.486
TFAP2A	LTR	ERVL-MaLR	MLT1C	10	0.0009302	1	0.393
ARID1A	LTR	ERVL	MER77B	36	0.00094749	1	1.826
TFAP2C	LTR	ERVK	LTR22C	2	0.00095854	1	51.017
SMARCA4	LTR	ERV1	MER4E1	31	0.00096939	1	1.932
TFAP2A	LTR	Gypsy?	LTR88c	9	0.00097161	1	3.061
TFAP2A	LTR	ERV1	LTR27B	5	0.00098244	1	6.919
GATA3	LTR	ERV1	LTR19-int	12	0.00098246	1	3.057
ARID1A	LTR	ERV1	MER92B	24	0.00098413	1	2.099
TFAP2C	LTR	ERVL	LTR79	20	0.00099524	1	2.267
GATA2	LTR	ERVL-MaLR	MSTA-int	5	0.0010009	1	0.289
SMARCA4	LTR	ERVL-MaLR	MLT1J2	63	0.0010023	1	0.669
TFAP2A	LTR	ERVL	LTR16	24	0.0010034	1	2.085
GATA3	LTR	ERVL	HERVL18-int	2	0.0010145	1	0.167
ARID1A	LTR	ERV1	HERV9NC-int	22	0.0010158	1	2.273
GATA2	LTR	ERV1	LTR37A	12	0.001017	1	2.97
ARID1A	LTR	ERV1	LTR58	6	0.0010516	1	5.59
TFAP2C	LTR	ERVK	MER9a3	8	0.0010537	1	4.053
ARID1A	LTR	Gypsy	LTR81	12	0.0010542	1	2.993
TFAP2C	LTR	ERV1	MER4E1	11	0.0010563	1	3.142
SMARCA4	LTR	ERVL	LTR47A2	11	0.0010605	1	3.183
TFAP2C	LTR	ERV1	LTR38	5	0.0010691	1	6.739
ARID1A	LTR	ERV1	MER67D	29	0.0010828	1	1.941
GATA2	LTR	ERV1	LTR45C	6	0.0010838	1	5.371
ARID1A	LTR?	MamRep605b	MamRep605b	48	0.001085	1	1.642
MSX2	LTR	ERV1	MER57-int	8	0.0011312	1	0.359
GATA3	LTR	ERVL	LTR108e_Mam	7	0.001135	1	3.535
TFAP2A	LTR	ERVL	LTR32	13	0.0011632	1	2.783
TFAP2A	LTR	ERVL	LTR84b	12	0.0011874	1	2.919
MSX2	LTR	ERV1	LTR19-int	10	0.0012196	1	3.369
TFAP2C	LTR	ERVL-MaLR	MLT1A	9	0.0012331	1	0.382
GATA2	LTR	ERVL	LTR84b	9	0.0012393	1	3.568
ARID1A	LTR	ERV1	HUERS-P1-int	23	0.001259	1	2.109
GATA2	LTR	ERV1	HERV9NC-int	10	0.0012659	1	3.332
SMARCA4	LTR	ERV1	MER34C2	19	0.0012754	1	2.298
TFAP2A	LTR	ERVL-MaLR	MLT-int	7	0.0012831	1	4.444
GATA3	LTR	ERVK	HERVK13-int	8	0.0012876	1	4.137
TFAP2C	LTR?	MamRep605b	MamRep605b	12	0.0012918	1	2.532
GATA3	LTR	ERVL	MER70A	17	0.0012964	1	2.28
MSX2	LTR	ERVL	LTR86B1	10	0.0013009	1	3.304
ARID1A	LTR	ERVL-MaLR	MLT1A1-int	20	0.0013273	1	2.223
MSX2	LTR	ERVL	MER54B	14	0.0013507	1	2.639
GATA3	LTR	ERVL	LTR84b	26	0.0013621	1	1.981
GATA3	LTR	ERVL?	Eutr10	23	0.0013623	1	2.082
TFAP2C	LTR	ERV1	LTR48	10	0.0013628	1	3.252
SMARCA4	LTR?	MER129	MER129	7	0.0013672	1	4.475
TFAP2A	LTR	ERVL	LTR80A	6	0.0013765	1	3.752
ARID1A	LTR	ERV1	MER50C	5	0.0013971	1	4.336
ARID1A	LTR	ERV1	MER57-int	11	0.0014039	1	0.421
ARID1A	LTR	ERVL	LTR40A1	18	0.0014069	1	2.377
SMARCA4	LTR	ERVL-MaLR	MLT1H1	31	0.0014083	1	0.579
MSX2	LTR	ERV1	MER92B	20	0.0014123	1	2.197
TFAP2A	LTR	ERVL	ERVL-E-int	24	0.0014195	1	0.545
SMARCA4	LTR	ERV1	LTR12D	1	0.001446	1	0.104
MSX2	LTR	ERVL	HERVL-int	42	0.001452	1	0.624
MSX2	LTR	ERVL-MaLR	MLT1D-int	18	0.0014684	1	2.359
MSX2	LTR	ERVL	LTR16A1	48	0.0014804	1	1.645
TFAP2A	LTR	ERVL-MaLR	MLT1J	31	0.0014832	1	0.583
GATA3	LTR?	MER129	MER129	6	0.0014888	1	5.129
GATA3	LTR	ERV1	MER34-int	15	0.0014953	1	2.515
GATA3	LTR	ERVL-MaLR	MLT1B-int	18	0.0015047	1	2.35
TFAP2A	LTR	ERV1	MER4E1	13	0.001515	1	2.701
TFAP2C	LTR	ERV1	LTR19C	4	0.0015322	1	8.454
MSX2	LTR	ERVL	MER77B	30	0.0015646	1	1.875
TFAP2C	LTR	ERVL	MER77B	12	0.0015673	1	2.822
GATA3	LTR	ERV1	LTR45	8	0.0016238	1	3.834
MSX2	LTR	ERVL-MaLR	MLT1B-int	16	0.0016365	1	2.401
MSX2	LTR	ERV1	MER52C	0	0.0016525	1	0
GATA2	LTR	ERV1	MER110	7	0.0016667	1	4.224
TFAP2C	LTR	ERV1	LTR25	4	0.0016697	1	4.844
SMARCA4	LTR	ERVK	MER9a2	13	0.0016954	1	2.696
TFAP2C	LTR	ERV1	MER41-int	19	0.0016999	1	2.211
MSX2	LTR	ERV1	PABL_A	0	0.0017025	1	0
TFAP2A	LTR	ERV1	MER48	4	0.0017514	1	4.797
GATA2	LTR	ERVL	MLT2B5	5	0.0017544	1	5.988
GATA3	LTR	ERV1	MER110	19	0.0017614	1	2.209
GATA3	LTR	ERVL-MaLR	MLT1C2	247	0.0017785	1	1.229
ARID1A	LTR	ERV1	MER4CL34	25	0.0017814	1	1.978
TFAP2A	LTR	ERVL-MaLR	MLT1O	28	0.0018054	1	1.835
GATA2	LTR	ERV1	MER65C	7	0.0018319	1	4.155
TFAP2A	LTR	ERVL	LTR42	6	0.0019032	1	4.816
ARID1A	LTR	ERVL	ERVL-B4-int	49	0.0019058	1	0.65
TFAP2A	LTR	ERV1	MER92B	10	0.0019121	1	3.105
TFAP2C	LTR	ERVL	MLT2A2	3	0.001915	1	0.233
MSX2	LTR	ERVL-MaLR	MLT1L	157	0.0019189	1	1.293
GATA3	LTR	ERVL-MaLR	MSTB1	36	0.0019294	1	0.612
SMARCA4	LTR	ERV1	MER65C	21	0.0019339	1	2.134
SMARCA4	LTR	ERVK	LTR22C0	7	0.001955	1	4.216
SMARCA4	LTR	ERVL	HERVL32-int	8	0.0019622	1	3.751
GATA2	LTR	ERV1	LTR48B	9	0.0019766	1	3.33
ARID1A	LTR	ERVL-MaLR	MLT1O	90	0.0019807	1	1.413
GATA2	LTR	ERV1	LTR26D	3	0.0019912	1	5.829
MSX2	LTR	ERV1	LOR1-int	7	0.0019943	1	0.35
MSX2	LTR	ERVL-MaLR	MLT1K	226	0.0020039	1	1.237
SMARCA4	LTR	ERVL	MER21-int	29	0.0020112	1	1.872
GATA3	LTR	ERVL?	LTR55	14	0.0020562	1	2.52
GATA2	LTR	ERV1	LTR7B	8	0.0020823	1	3.622
MSX2	LTR	ERV1	LTR68	11	0.0021567	1	2.887
GATA3	LTR	ERV1	ERV24_Prim-int	17	0.0022069	1	2.333
TFAP2A	LTR	ERV1	MER51B	9	0.0022103	1	3.279
TFAP2A	LTR	ERVL	MER68-int	6	0.002216	1	3.444
ARID1A	LTR	ERVL-MaLR	MLT1K	284	0.0022555	1	1.206
SMARCA4	LTR	ERVL	LTR33A	13	0.0022856	1	0.455
TFAP2C	LTR	ERVL	LTR42	5	0.0022923	1	5.636
GATA3	LTR	ERVL	LTR101_Mam	26	0.0022975	1	1.932
GATA3	LTR	ERVL	LTR80A	13	0.0023152	1	2.588
MSX2	LTR	ERV1	LTR38B	9	0.0023309	1	3.289
GATA3	LTR	ERVL-MaLR	MLT1L	162	0.0023575	1	1.282
ARID1A	LTR	ERV1	LTR19B	11	0.0023651	1	2.867
GATA2	LTR	ERVL-MaLR	MLT1A1	5	0.0024739	1	0.311
TFAP2C	LTR	ERVK	LTR3B	3	0.0024802	1	11.705
TFAP2A	LTR	ERVL?	LTR55	7	0.0024849	1	3.944
GATA3	LTR	ERV1	MER66B	6	0.0024872	1	0.34
TFAP2C	LTR	ERVL	HERVL32-int	4	0.0025	1	7.384
ARID1A	LTR	ERV1	LOR1-int	10	0.0025084	1	0.415
MSX2	LTR	ERV1	LTR59	6	0.0025119	1	4.624
GATA2	LTR	ERV1	HERV30-int	4	0.0025242	1	7.512
MSX2	LTR	ERV1	LTR36	14	0.0025519	1	2.455
GATA3	LTR	ERVL-MaLR	THE1A	33	0.0025555	1	0.604
MSX2	LTR	ERVL-MaLR	MLT1C	48	0.0025717	1	0.655
SMARCA4	LTR	ERV1	LTR37-int	8	0.0025856	1	0.381
GATA3	LTR	ERV1	PABL_A	18	0.0025899	1	2.19
TFAP2C	LTR	ERV1	LTR8A	12	0.0026198	1	2.333
ARID1A	LTR	ERV1	LTR25-int	20	0.0026404	1	2.132
SMARCA4	LTR	ERV1	HERVP71A-int	13	0.0026491	1	2.578
GATA3	LTR	ERV1	MER34D	10	0.002691	1	2.99
MSX2	LTR?	MamRep605b	MamRep605b	38	0.002693	1	1.707
GATA3	LTR	ERV1	MER52-int	4	0.0026948	1	0.279
TFAP2C	LTR	ERVL-MaLR	MLT1J-int	11	0.002717	1	2.775
TFAP2A	LTR	ERVL	MER68C	4	0.0027774	1	7.134
TFAP2A	LTR	ERVL	MER74C	5	0.0028674	1	5.358
MSX2	LTR	ERV1	HERVIP10FH-int	17	0.002961	1	2.236
ARID1A	LTR	ERV1	LTR38B	10	0.0029777	1	2.952
SMARCA4	LTR	ERV1	MER57A-int	16	0.0029863	1	0.499
GATA3	LTR	ERV1	LTR65	13	0.0029969	1	2.505
TFAP2A	LTR	ERV1	LTR46	5	0.0029971	1	5.3
MSX2	LTR	ERVK	LTR22	5	0.0030233	1	5.434
SMARCA4	LTR	ERV1	LTR8A	38	0.0030675	1	1.672
TFAP2C	LTR	ERVL-MaLR	MLT1K	62	0.0031325	1	1.484
ARID1A	LTR	ERVL	MER68-int	14	0.0032162	1	2.395
GATA2	LTR	ERVL	MLT2A1	1	0.0032506	1	0.115
TFAP2C	LTR	ERV1	MER48	3	0.0032847	1	5.064
TFAP2C	LTR	ERV1	MER4D0	6	0.0033029	1	4.286
SMARCA4	LTR	ERVL-MaLR	MLT1A-int	16	0.0033216	1	2.299
TFAP2C	LTR	ERVL	LTR80B	6	0.0033318	1	4.275
MSX2	LTR	ERVL	LTR86B2	9	0.0033495	1	3.099
GATA3	LTR	ERV1	MER89	30	0.003376	1	1.746
ARID1A	LTR	ERVL	MER74A	39	0.0034413	1	1.664
MSX2	LTR	ERVL	ERVL-B4-int	41	0.0034809	1	0.642
ARID1A	LTR	ERV1	LTR38	10	0.0035222	1	2.88
SMARCA4	LTR	ERVL	MER68-int	14	0.003549	1	2.368
GATA3	LTR	ERVL	LTR16C	105	0.0035976	1	1.35
TFAP2A	LTR	ERV1	PRIMA41-int	10	0.0036027	1	2.846
TFAP2C	LTR	ERVL?	Eutr10	7	0.0036029	1	2.886
MSX2	LTR	ERVL	MLT2C1	43	0.0036082	1	1.6
SMARCA4	LTR	ERVL	LTR53-int	0	0.0036308	1	0
MSX2	LTR	ERV1	MER51B	17	0.0036395	1	2.167
SMARCA4	LTR	ERVL	HERVL74-int	0	0.0036463	1	0
TFAP2A	LTR	ERV1	LTR8A	16	0.003652	1	2.251
MSX2	LTR	ERVL-MaLR	MLT1I	82	0.0036691	1	0.729
ARID1A	LTR	ERV1	LTR26B	7	0.0036957	1	3.723
TFAP2C	LTR	ERVL-MaLR	THE1A	3	0.003706	1	0.246
ARID1A	LTR	ERV1	MER57C2	0	0.0037629	1	0
TFAP2C	LTR	ERV1	MER84-int	4	0.0037952	1	6.545
TFAP2A	LTR	ERV1	LTR7B	10	0.0038325	1	2.811
SMARCA4	LTR	ERV1	MER57C2	0	0.0039317	1	0
TFAP2A	LTR	ERVL-MaLR	MLT1B-int	8	0.0039325	1	3.262
TFAP2A	LTR	ERVL-MaLR	MST-int	5	0.0039914	1	4.957
SMARCA4	LTR	Gypsy	LTR81	11	0.0040005	1	2.659
ARID1A	LTR	ERVL-MaLR	MLT1E1A	30	0.0040109	1	0.603
GATA3	LTR	ERVL	LTR33	138	0.0040501	1	1.293
ARID1A	LTR	ERV1	LTR25	9	0.004055	1	3.028
GATA3	LTR	ERV1	LTR10B	5	0.0040607	1	5.066
MSX2	LTR	ERV1	MER87	7	0.0041012	1	3.637
SMARCA4	LTR	ERVL	LTR16D	5	0.0043531	1	0.32
SMARCA4	LTR	ERV1	LTR25-int	19	0.0043667	1	2.061
GATA2	LTR	ERVL	LTR16A2	11	0.0043675	1	2.6
TFAP2C	LTR	ERV1	LTR6A	5	0.0043973	1	4.827
TFAP2A	LTR	ERVL	MER54B	6	0.0044365	1	3.027
SMARCA4	LTR	ERV1	LTR45C	15	0.004599	1	2.3
ARID1A	LTR	ERV1	LTR15	10	0.0046275	1	2.765
GATA2	LTR	ERVL	LTR40c	5	0.0046308	1	3.317
TFAP2A	LTR	ERV1	LTR38	5	0.0046347	1	4.777
GATA2	LTR	ERV1	LTR38	4	0.0046365	1	6.14
TFAP2A	LTR	ERV1	LTR10B	3	0.0046703	1	9.355
SMARCA4	LTR	ERV1	ERV24B_Prim-int	15	0.0047066	1	2.292
MSX2	LTR	Gypsy	MamGypsy2-I	40	0.0047652	1	1.604
MSX2	LTR	ERV1	MER52D	3	0.0047743	1	0.249
GATA2	LTR	ERV1	LTR26B	2	0.0047798	1	6.055
TFAP2C	LTR	Gypsy?	LTR88c	7	0.0047826	1	3.476
ARID1A	LTR	ERVL	MER54A	3	0.0047859	1	0.253
SMARCA4	LTR	ERVL	MER54A	3	0.0048049	1	0.251
MSX2	LTR	ERVL-MaLR	MSTC	19	0.0048077	1	0.539
MSX2	LTR	ERV1	MER57D	12	0.0048171	1	2.462
ARID1A	LTR	ERV1	ERV24B_Prim-int	15	0.0048231	1	2.281
GATA3	LTR	Gypsy?	LTR85a	32	0.0048245	1	1.722
ARID1A	LTR	ERVL	MER21B	64	0.0048358	1	1.458
MSX2	LTR	ERV1	LTR12	3	0.0048448	1	0.249
MSX2	LTR	ERV1	LTR26B	6	0.0048885	1	4.006
GATA2	LTR	ERV1	MER34D	3	0.0049303	1	4.502
GATA3	LTR	ERV1	LOR1b	26	0.0049321	1	1.817
GATA2	LTR	ERVL	MER77B	9	0.0049469	1	2.431
GATA2	LTR	ERVL	LTR108c_Mam	1	0.0050759	1	9.689
ARID1A	LTR	ERV1	MER34C	8	0.0051555	1	3.148
SMARCA4	LTR	ERV1	MER52D	4	0.0051833	1	0.295
GATA2	LTR	ERVL	MER68-int	4	0.0052073	1	3.689
TFAP2A	LTR	ERVL-MaLR	MSTC	3	0.0052246	1	0.249
ARID1A	LTR	ERV1	MER34D	10	0.0052295	1	2.713
TFAP2A	LTR	ERVL-MaLR	MLT1K	83	0.0052969	1	1.382
GATA3	LTR	ERVL	MLT2D	70	0.0053153	1	1.416
GATA3	LTR	ERV1	MER50-int	23	0.0053647	1	1.906
GATA2	LTR	ERV1	MER92A	2	0.0053737	1	5.798
SMARCA4	LTR	ERV1	LTR76	9	0.005394	1	2.892
ARID1A	LTR	ERV1	MER52D	4	0.0053988	1	0.289
GATA3	LTR	ERV1	HUERS-P3b-int	23	0.0054208	1	1.903
TFAP2A	LTR	ERV1	MER50-int	10	0.0055565	1	2.668
GATA3	LTR	ERV1	LTR26D	8	0.0056312	1	3.102
TFAP2A	LTR	ERV1	LTR56	10	0.005727	1	2.646
MSX2	LTR	ERV1	MER65-int	5	0.0057373	1	0.33
SMARCA4	LTR	MamRep1527	MamRep1527	7	0.0057683	1	0.39
TFAP2C	LTR	Gypsy	LTR81	4	0.0057713	1	5.749
SMARCA4	LTR?	MamRep1151	MamRep1151	7	0.0058137	1	0.387
GATA2	LTR	ERV1	MER34C_	5	0.0058289	1	3.157
GATA2	LTR	ERVL-MaLR	THE1A-int	2	0.0058396	1	0.204
GATA3	LTR	ERVL-MaLR	MLT-int	12	0.0058468	1	2.403
GATA3	LTR	ERV1	MER34C	7	0.0058838	1	3.383
TFAP2A	LTR	ERVL	MER21-int	12	0.0059153	1	2.385
SMARCA4	LTR	ERV1	LTR6A	11	0.0059455	1	2.52
SMARCA4	LTR	ERV1	MER52C	1	0.0059505	1	0.126
TFAP2A	LTR	ERVL	LTR82B	10	0.0059827	1	2.262
ARID1A	LTR	ERVL	MLT2C1	52	0.006026	1	1.504
ARID1A	LTR	ERVK	LTR3B	5	0.0061308	1	4.569
GATA2	LTR	ERV1	LTR38C	3	0.0061934	1	8.332
TFAP2A	LTR	ERVK	HERVK14C-int	4	0.0062256	1	5.833
GATA2	LTR	ERV1	LTR31	4	0.0062296	1	5.635
SMARCA4	LTR	ERV1	LTR37A	42	0.0062366	1	1.572
TFAP2C	LTR	ERV1	LTR4	3	0.0062467	1	8.344
GATA3	LTR	Gypsy	LTR81	9	0.0062519	1	2.803
GATA3	LTR	ERVL-MaLR	MSTB-int	11	0.0062805	1	0.459
TFAP2C	LTR	ERV1	LTR75_1	3	0.0062904	1	8.285
TFAP2C	LTR	Gypsy?	LTR85b	8	0.0063482	1	2.994
TFAP2C	LTR	ERV1	LTR56	8	0.0063705	1	2.993
GATA3	LTR	ERV1	HERVFH21-int	10	0.0064046	1	2.676
MSX2	LTR	ERV1	HERV1_LTRb	2	0.0064087	1	20.451
TFAP2A	LTR	Gypsy?	LTR85b	10	0.0064179	1	2.6
ARID1A	LTR	ERV1	MER52-int	3	0.0064303	1	0.256
GATA3	LTR	ERVL	LTR16B1	27	0.0065575	1	1.763
SMARCA4	LTR	ERV1	MER65D	14	0.0065843	1	2.286
TFAP2C	LTR	ERVL-MaLR	MLT1I	12	0.0065869	1	0.476
TFAP2A	LTR	Gypsy	MamGypLTR1b	10	0.0066054	1	2.589
TFAP2A	LTR	ERV1	LTR78	31	0.0067576	1	1.684
GATA2	LTR	ERV1	PABL_A	6	0.0068169	1	3.674
GATA3	LTR	ERVK	LTR22	5	0.006821	1	4.456
TFAP2C	LTR	ERV1	LTR65	4	0.0068688	1	3.445
SMARCA4	LTR	Gypsy	MamGypLTR1c	27	0.0068782	1	1.749
GATA2	LTR	ERVL-MaLR	MSTB1	3	0.0069236	1	0.264
TFAP2A	LTR	ERV1	MER61D	5	0.0069358	1	4.322
MSX2	LTR	ERV1	LTR45C	12	0.0069432	1	2.345
GATA3	LTR	ERV1	HERV1_LTRe	3	0.0069945	1	8.397
MSX2	LTR	Gypsy?	LTR88b	27	0.0069963	1	1.744
TFAP2A	LTR	ERV1	LOR1b	11	0.0070146	1	2.436
TFAP2A	LTR	ERVK	HERVK-int	10	0.0070178	1	2.597
ARID1A	LTR	ERV1	HERVI-int	8	0.0071465	1	3.044
TFAP2A	LTR	ERV1	MER65C	8	0.0072233	1	2.932
ARID1A	LTR	ERV1	LTR59	6	0.0073107	1	3.689
GATA2	LTR	ERVL-MaLR	MLT1I	10	0.0073121	1	0.451
MSX2	LTR	ERVL-MaLR	MSTB-int	7	0.0073868	1	0.396
SMARCA4	LTR	ERVL-MaLR	MLT1E	4	0.0075105	1	0.3
SMARCA4	LTR	ERV1	LTR10C	17	0.0075376	1	2.058
ARID1A	LTR	ERV1	LTR26	18	0.0075796	1	1.971
TFAP2A	LTR	ERVL	ERV3-16A3_LTR	10	0.0075932	1	2.535
TFAP2C	LTR	ERV1	MER61B	4	0.0076254	1	3.358
GATA3	LTR	ERVL-MaLR	MLT1E1	24	0.0076276	1	1.835
TFAP2C	LTR	ERVL	ERV3-16A3_LTR	8	0.0076402	1	2.898
ARID1A	LTR?	MamRep1151	MamRep1151	7	0.0076484	1	0.395
ARID1A	LTR	ERVL	LTR86B1	10	0.0076635	1	2.554
SMARCA4	LTR	ERV1	ERV24_Prim-int	15	0.0076819	1	2.117
GATA3	LTR	ERVL	LTR84a	15	0.0077134	1	2.107
GATA3	LTR?	MamRep605	MamRep605	54	0.0077413	1	1.472
SMARCA4	LTR	ERV1	MER34A	34	0.0077477	1	1.637
SMARCA4	LTR?	MamRep605b	MamRep605b	46	0.0077532	1	1.522
TFAP2C	LTR	ERVL	MER68C	3	0.0078083	1	7.629
MSX2	LTR	ERVL	MER68C	6	0.0078814	1	3.602
ARID1A	LTR	ERV1	LTR12D	2	0.0078946	1	0.205
GATA3	LTR	ERV1	LTR12_	2	0.0078983	1	0.207
GATA2	LTR	ERVL-MaLR	MLT1E2-int	3	0.0079234	1	7.614
TFAP2A	LTR	ERVL	MLT2B3	5	0.0079474	1	0.342
TFAP2A	LTR	ERVK	MER9a1	6	0.0079526	1	3.564
MSX2	LTR	ERVL	MLT2B5	9	0.0079659	1	2.273
GATA2	LTR	ERV1	MER34C	3	0.0080749	1	7.519
SMARCA4	LTR	ERV1	MER72B	8	0.0080997	1	2.911
TFAP2A	LTR	ERV1	HUERS-P3b-int	9	0.008122	1	2.262
MSX2	LTR	ERVL	MER54A	2	0.0081394	1	0.206
ARID1A	LTR	ERVK	LTR22B1	7	0.0081432	1	3.197
GATA2	LTR	ERV1	LTR10B1	3	0.0082493	1	7.479
ARID1A	LTR	ERV1	LTR78	90	0.0083709	1	1.335
ARID1A	LTR	ERV1	LTR45C	14	0.0084137	1	2.177
MSX2	LTR	ERVK	MER9a2	10	0.0084461	1	2.516
SMARCA4	LTR	ERV1	LTR2C	10	0.0084685	1	2.517
TFAP2A	LTR	Gypsy	LTR81AB	3	0.0084765	1	3.843
GATA3	LTR	ERV1	MER4B-int	39	0.0085879	1	1.565
ARID1A	LTR	ERVL-MaLR	MLT1H2	42	0.0086408	1	0.672
SMARCA4	LTR	ERV1	LTR72	7	0.0086438	1	3.154
GATA3	LTR	ERV1	LTR7Y	9	0.0086904	1	2.663
GATA2	LTR	ERVL-MaLR	MLT1B	24	0.0087646	1	0.597
TFAP2A	LTR	Gypsy	MamGypsy2-LTR	7	0.0088045	1	3.091
GATA2	LTR	ERV1	LTR26C	3	0.0088519	1	3.792
GATA2	LTR	ERV1	MER4-int	20	0.0088525	1	1.863
TFAP2C	LTR	ERVL	MER21B	19	0.0088865	1	1.953
ARID1A	LTR	ERVK	HERVK-int	17	0.0089084	1	2.012
ARID1A	LTR	ERV1	MER92C	6	0.0089346	1	3.522
GATA2	LTR	ERV1	LTR26	6	0.0089608	1	3.459
ARID1A	LTR	ERV1	HERV1_LTRe	3	0.009151	1	7.597
TFAP2C	LTR	ERVL-MaLR	MLT1B-int	6	0.0091587	1	3.444
ARID1A	LTR	ERV1	HERV9N-int	14	0.0091846	1	2.167
ARID1A	LTR	ERV1	HERV1_LTRb	2	0.0093384	1	16.774
TFAP2A	LTR	ERVL	LTR47B3	3	0.0093494	1	7.172
SMARCA4	LTR	ERV1	HERV1_LTRb	2	0.0094122	1	16.704
SMARCA4	LTR	ERV1	MER4D0	14	0.009443	1	2.136
MSX2	LTR	Gypsy?	LTR85a	30	0.0095126	1	1.647
GATA2	LTR	ERVL-MaLR	MLT1J-int	9	0.0095514	1	2.592
GATA2	LTR	ERVL	MLT2A2	3	0.0095915	1	0.269
TFAP2C	LTR	ERVL?	LTR55	5	0.009733	1	3.959
SMARCA4	LTR	ERV1	MER92C	5	0.009746	1	2.855
ARID1A	LTR	ERV1	LTR12	5	0.0098042	1	0.353
ARID1A	LTR	ERV1	HERV3-int	14	0.0099926	1	2.129
GATA2	LTR	ERV1	MER31-int	9	0.010084	1	2.57
MSX2	LTR	ERV1	MER57A1	4	0.010115	1	0.311
GATA3	LTR	ERV1	LTR27B	7	0.010152	1	3.055
TFAP2A	LTR	Gypsy	MamGypLTR1d	7	0.010152	1	3.007
GATA2	LTR	Gypsy?	LTR85a	9	0.010265	1	2.56
GATA3	LTR	ERVL-MaLR	MLT1A-int	14	0.010267	1	2.107
SMARCA4	LTR	ERV1	MER48	8	0.010311	1	2.783
TFAP2A	LTR	ERVL-MaLR	MLT1L	56	0.01042	1	1.426
TFAP2C	LTR	ERVL-MaLR	MLT1J	22	0.010468	1	0.593
GATA2	LTR	ERVL-MaLR	MLT1C	6	0.010564	1	0.383
GATA3	LTR	ERVL	MER21-int	27	0.010577	1	1.715
MSX2	LTR	ERVL-MaLR	MLT1J1-int	13	0.010624	1	2.207
GATA3	LTR	ERV1	MER52C	2	0.010628	1	0.216
MSX2	LTR	ERV1	HERV3-int	13	0.010764	1	2.211
MSX2	LTR	ERVL	HERVL18-int	2	0.010839	1	0.219
SMARCA4	LTR	ERV1	HERVFH19-int	7	0.010899	1	3.046
TFAP2C	LTR	ERVL	LTR69	2	0.010923	1	4.463
ARID1A	LTR	ERV1	LTR12F	2	0.010939	1	0.219
TFAP2C	LTR	ERV1	HERVH-int	54	0.011043	1	1.435
TFAP2C	LTR	ERVL	MER70B	5	0.011044	1	3.833
TFAP2A	LTR	ERVL-MaLR	MLT1E2	29	0.011046	1	1.662
SMARCA4	LTR	ERV1	LTR12F	2	0.011055	1	0.217
MSX2	LTR	ERVL-MaLR	MLT1F1	51	0.011099	1	1.448
MSX2	LTR	ERVL	LTR47B	3	0.011108	1	6.915
GATA2	LTR	ERV1	MER50-int	7	0.011129	1	2.958
SMARCA4	LTR	ERV1	LTR38	9	0.011213	1	2.554
SMARCA4	LTR	ERV1	LTR2752	0	0.011377	1	0
TFAP2A	LTR	ERV1	MER57-int	2	0.011564	1	0.216
SMARCA4	LTR	ERVL	LTR75	10	0.01164	1	2.393
MSX2	LTR	ERV1	MER57C2	0	0.011679	1	0
GATA3	LTR	ERVL-MaLR	MLT1D-int	18	0.011721	1	1.953
ARID1A	LTR	ERV1	MER57A-int	18	0.011733	1	0.564
ARID1A	LTR	ERVL	HERVL18-int	3	0.012025	1	0.282
SMARCA4	LTR	ERV1	LTR78B	28	0.012128	1	0.63
TFAP2A	LTR	ERV1	HERV30-int	4	0.012138	1	4.754
MSX2	LTR	ERV1	LTR1D	0	0.01222	1	0
GATA3	LTR	ERV1	MER83C	6	0.012227	1	3.27
GATA3	LTR	ERVL	LTR47B3	5	0.012255	1	3.794
GATA2	LTR	ERVL-MaLR	THE1D	18	0.012271	1	0.568
TFAP2A	LTR	ERV1	MER52D	0	0.012367	1	0
SMARCA4	LTR	ERVL-MaLR	MSTB2	12	0.012373	1	0.506
TFAP2A	LTR	Gypsy	MamGypLTR1a	9	0.012404	1	2.482
ARID1A	LTR	ERV1	HERVFH19-int	7	0.012441	1	2.965
GATA3	LTR	ERVK	LTR5A	1	0.012537	1	0.134
MSX2	LTR	ERVL	LTR105_Mam	1	0.012538	1	0.141
ARID1A	LTR	ERV1	MER34C2	16	0.012672	1	1.962
TFAP2C	LTR	ERVL	MLT2B3	3	0.012688	1	0.287
SMARCA4	LTR	ERV1	HERV30-int	6	0.012802	1	3.33
ARID1A	LTR	ERVL?	Eutr10	23	0.013018	1	1.729
SMARCA4	LTR	ERV1	HUERS-P1-int	20	0.013091	1	1.855
MSX2	LTR	ERV1	LTR12F	1	0.013204	1	0.135
ARID1A	LTR	ERV1	MER34B	18	0.013222	1	1.893
TFAP2A	LTR	ERV1	LTR25-int	9	0.013232	1	2.466
GATA3	LTR	ERV1	LTR60B	9	0.01326	1	2.478
SMARCA4	LTR	ERVL-MaLR	MLT1I-int	4	0.013265	1	0.322
GATA3	LTR	ERVL-MaLR	MLT1B	174	0.013364	1	0.829
MSX2	LTR	ERV1	MER92C	5	0.013393	1	3.7
MSX2	LTR	ERV1	MER57A-int	14	0.013395	1	0.532
GATA2	LTR	ERV1	LTR54	7	0.013446	1	2.838
ARID1A	LTR	ERVL-MaLR	MLT1C	69	0.013458	1	0.746
GATA3	LTR	ERV1	PRIMA4-int	15	0.01375	1	2.051
GATA3	LTR	ERVL	LTR108d_Mam	4	0.013858	1	4.548
MSX2	LTR	ERV1	LTR25	7	0.013866	1	2.856
TFAP2C	LTR	ERV1?	EUTREP15	3	0.013885	1	6.137
GATA2	LTR	ERVK	LTR13A	4	0.013945	1	4.446
SMARCA4	LTR	ERV1	MER67C	37	0.013989	1	1.529
GATA2	LTR	ERVK	HERVK-int	7	0.01419	1	2.833
GATA3	LTR	Gypsy	MamGypLTR4	15	0.014303	1	2.027
MSX2	LTR	ERV1	LTR45	6	0.014311	1	3.149
GATA3	LTR	Gypsy	LTR81B	22	0.014322	1	1.771
GATA2	LTR	ERVL	LTR108d_Mam	1	0.014338	1	5.599
TFAP2C	LTR	ERV1	HUERS-P1-int	8	0.014385	1	2.59
MSX2	LTR	ERV1	MER89	26	0.014412	1	1.681
GATA2	LTR	ERV1	MER41-int	15	0.014562	1	2.016
GATA3	LTR	ERVL	MER70C	9	0.014621	1	2.434
TFAP2A	LTR	ERV1	LTR51	5	0.014858	1	2.573
GATA2	LTR	Gypsy	MamGypLTR4	5	0.014874	1	3.544
GATA3	LTR	ERV1	LTR25-int	20	0.014875	1	1.803
GATA3	LTR	ERVL	MER68-int	12	0.014893	1	2.199
ARID1A	LTR	ERV1	HERV30-int	6	0.015279	1	3.197
MSX2	LTR	Gypsy	LTR81	8	0.01531	1	2.569
GATA3	LTR	Gypsy	LTR81AB	7	0.015329	1	2.785
MSX2	LTR	ERV1	LTR60B	8	0.015357	1	2.575
GATA2	LTR	ERV1	LTR24C	4	0.015549	1	4.278
MSX2	LTR	ERVL	LTR86C	8	0.015558	1	2.564
GATA3	LTR	ERVL	LTR16D1	7	0.015623	1	2.782
TFAP2C	LTR	ERV1	MER67B	5	0.015723	1	3.499
TFAP2A	LTR	ERVL	MLT2B2	2	0.016099	1	0.227
TFAP2A	LTR	ERV1	LTR75_1	3	0.016104	1	5.828
TFAP2A	LTR	ERVL	LTR79	22	0.016138	1	1.724
TFAP2A	LTR	ERV1	MER83B	3	0.016158	1	5.811
MSX2	LTR	ERV1	MER52-int	3	0.016373	1	0.291
TFAP2A	LTR	ERVL-MaLR	MLT1J-int	12	0.016497	1	2.137
SMARCA4	LTR	ERV1	HERVIP10B3-int	12	0.016647	1	2.154
TFAP2A	LTR	ERVL-MaLR	MLT1G	20	0.01667	1	1.758
MSX2	LTR	ERVL	LTR33B	7	0.016867	1	0.434
GATA3	LTR	ERVK	LTR22C	2	0.016996	1	11.45
TFAP2C	LTR	ERVL-MaLR	MLT1C	8	0.017021	1	0.445
TFAP2C	LTR	ERV1	MER34A	9	0.017032	1	2.348
MSX2	LTR	ERV1	MER50C	3	0.017049	1	3.143
GATA3	LTR	ERVL	LTR108c_Mam	3	0.017057	1	5.866
GATA3	LTR	ERVL	LTR67B	53	0.017072	1	1.413
MSX2	LTR	ERVL	LTR57-int	0	0.017095	1	0
GATA3	LTR	ERV1	MER101	0	0.0171	1	0
MSX2	LTR	LTR90A	LTR90A	9	0.0171	1	2.359
TFAP2A	LTR	ERVL	MER76	8	0.017184	1	2.501
TFAP2A	LTR	ERVL	MER74B	9	0.017375	1	2.342
TFAP2A	LTR	ERV1	MER57A1	0	0.017572	1	0
SMARCA4	LTR	ERV1	MER110-int	1	0.017611	1	0.147
GATA3	LTR	ERV1	HERV30-int	7	0.017617	1	2.812
GATA3	LTR	ERV1	LTR44	7	0.017716	1	2.711
TFAP2A	LTR?	MamRep1151	MamRep1151	0	0.017744	1	0
GATA3	LTR	ERVL-MaLR	MLT1E2-int	6	0.017753	1	3.013
TFAP2A	LTR	ERVL	LTR16D	9	0.017775	1	2.331
GATA3	LTR	ERV1	LTR43	12	0.017843	1	2.109
GATA2	LTR	ERVL	LTR101_Mam	6	0.017879	1	2.292
MSX2	LTR	ERVL-MaLR	MLT1M	34	0.018057	1	1.541
ARID1A	LTR	ERVK	LTR22C	2	0.018172	1	11.045
GATA2	LTR	ERV1	LTR58	2	0.018257	1	9.968
GATA2	LTR	ERV1	HERVE-int	7	0.018517	1	2.681
SMARCA4	LTR	Gypsy?	LTR85a	37	0.01891	1	1.511
GATA3	LTR	ERV1	MER48	7	0.018922	1	2.676
MSX2	LTR	ERVL-MaLR	MLT1G1	27	0.019193	1	0.644
TFAP2C	LTR	ERVL?	LTR89B	5	0.019242	1	3.313
TFAP2C	LTR	ERV1	PRIMA41-int	7	0.019375	1	2.641
TFAP2A	LTR	ERVL	MER21B	23	0.019451	1	1.693
GATA2	LTR	ERV1	PABL_B	4	0.01951	1	3.989
MSX2	LTR	ERVL-MaLR	MLT1E1A	25	0.019681	1	0.631
TFAP2C	LTR	ERVL	LTR16D1	3	0.019823	1	5.352
GATA2	LTR	ERV1	MER61B	4	0.020248	1	3.941
ARID1A	LTR	ERV1	LTR2C	9	0.020265	1	2.297
SMARCA4	LTR	ERV1	MER34B-int	17	0.020433	1	1.82
TFAP2C	LTR	ERVL	LTR32	8	0.020435	1	2.415
TFAP2A	LTR	ERV1	MER34B	7	0.020749	1	2.599
GATA2	LTR	ERVK	LTR22C2	2	0.020849	1	9.296
ARID1A	LTR	ERV1	HERV1_LTRd	2	0.020898	1	10.145
TFAP2A	LTR	ERVK	MER9a2	5	0.021012	1	3.251
ARID1A	LTR	ERVL	LTR47B	3	0.021026	1	5.414
TFAP2C	LTR	Gypsy?	LTR85a	9	0.021063	1	2.26
TFAP2A	LTR	ERV1	MER110	7	0.021146	1	2.587
SMARCA4	LTR	ERV1	HERV1_LTRd	2	0.02118	1	10.071
TFAP2A	LTR	ERVL-MaLR	MLT1J2-int	6	0.021224	1	2.214
ARID1A	LTR	ERVL	LTR47B3	5	0.02149	1	3.274
GATA3	LTR	ERVL-MaLR	MLT1A0-int	28	0.021684	1	1.595
ARID1A	LTR	ERV1	HERVH-int	159	0.021787	1	1.209
MSX2	LTR	ERVL-MaLR	MLT1G	46	0.021795	1	1.418
SMARCA4	LTR	ERV1	MER72	21	0.02196	1	1.694
MSX2	LTR	ERVL	LTR40a	35	0.02213	1	1.496
SMARCA4	LTR	ERVL	LTR47B	3	0.022177	1	5.303
GATA2	LTR	ERVL?	Eutr10	6	0.022238	1	2.809
GATA2	LTR?	MER129	MER129	2	0.022285	1	8.887
ARID1A	LTR	ERVL	MLT2C2	28	0.022378	1	1.583
SMARCA4	LTR	ERV1	MER52-int	4	0.022614	1	0.351
TFAP2A	LTR	Gypsy	MamGypLTR2c	8	0.022689	1	2.367
GATA3	LTR	ERVL-MaLR	MLT1E1-int	3	0.022693	1	5.244
TFAP2C	LTR	Gypsy	MamGypsy2-I	12	0.022754	1	2
GATA2	LTR	ERVL	LTR86B2	3	0.023017	1	5.039
MSX2	LTR	ERVL-MaLR	MLT1E3	33	0.0232	1	1.516
GATA3	LTR	ERV1	MER57A1	6	0.023243	1	0.409
MSX2	LTR	ERV1	MER34A1	16	0.023342	1	1.871
GATA2	LTR	ERVK	LTR22	2	0.023527	1	8.708
ARID1A	LTR	ERV1	MER72B	7	0.023532	1	2.558
ARID1A	LTR	ERVL	LTR82B	26	0.023555	1	1.607
ARID1A	LTR	ERVL	LTR16C	114	0.023557	1	1.246
SMARCA4	LTR	ERVL	MER77B	31	0.023658	1	1.551
TFAP2C	LTR	ERV1	LTR8B	12	0.023673	1	1.986
GATA3	LTR	ERVL-MaLR	MLT1F1	54	0.023757	1	1.386
TFAP2C	LTR	ERVL-MaLR	THE1A-int	4	0.02391	1	0.351
TFAP2A	LTR	Gypsy	LTR81A	7	0.024109	1	2.515
TFAP2C	LTR	ERV1	LTR6B	3	0.024124	1	4.972
TFAP2A	LTR	ERVL	LTR33A_	12	0.024185	1	1.978
MSX2	LTR	Gypsy	MamGypLTR1d	14	0.024327	1	1.903
ARID1A	LTR	ERVL-MaLR	MSTD-int	24	0.024343	1	1.639
TFAP2C	LTR	Gypsy	MamGypLTR1d	4	0.024419	1	2.484
ARID1A	LTR	ERVL-MaLR	MLT1M	42	0.024461	1	1.45
TFAP2C	LTR	ERVL	MLT2A1	3	0.024519	1	0.299
GATA3	LTR	ERV1	HUERS-P2-int	1	0.024536	1	0.153
ARID1A	LTR	ERVL	MER70C	9	0.024606	1	2.218
TFAP2C	LTR	ERVL	LTR108a_Mam	2	0.024774	1	8.437
SMARCA4	LTR	ERVL	LTR86A2	0	0.025158	1	0
TFAP2C	LTR	ERV1	LTR30	3	0.025244	1	4.892
ARID1A	LTR	Gypsy	MamGypsy2-I	45	0.02536	1	1.417
MSX2	LTR	ERVL-MaLR	MSTB1-int	8	0.025404	1	2.342
GATA3	LTR	Gypsy	MamGypLTR1a	20	0.025567	1	1.719
GATA3	LTR	ERV1	MER51B	16	0.025587	1	1.823
TFAP2C	LTR	ERV1	MER65-int	0	0.026042	1	0
MSX2	LTR	ERV1	LTR28B	0	0.026163	1	0
TFAP2C	LTR	ERV1	MER83B-int	4	0.026172	1	3.645
TFAP2A	LTR	ERVL	LTR69	3	0.026307	1	4.813
TFAP2A	LTR	ERV1	MER61B	4	0.026568	1	2.431
ARID1A	LTR	Gypsy	LTR104_Mam	37	0.026619	1	1.474
GATA2	LTR	ERVL?	LTR55	3	0.026622	1	2.705
MSX2	LTR	ERV1	LTR2752	0	0.02664	1	0
TFAP2C	LTR	ERVL	HERVL40-int	9	0.02667	1	2.067
TFAP2C	LTR	ERV1	MER101-int	0	0.026772	1	0
SMARCA4	LTR	ERV1	LTR38B	8	0.026802	1	2.314
TFAP2C	LTR	ERVK	LTR22C2	1	0.026805	1	3.997
GATA3	LTR	LTR107_Mam	LTR107_Mam	9	0.02684	1	2.045
GATA3	LTR	ERVL	MER68	11	0.02686	1	0.521
GATA3	LTR	ERV1?	EUTREP15	6	0.027425	1	2.699
GATA3	LTR	ERV1	MER66A	0	0.027442	1	0
MSX2	LTR	ERVK	MER11B	18	0.027728	1	1.736
GATA2	LTR	ERV1	MER34B	5	0.0279	1	3
TFAP2C	LTR?	MER129	MER129	2	0.027931	1	7.861
SMARCA4	LTR	ERV1	MER92-int	7	0.02809	1	0.448
TFAP2A	LTR	ERVL-MaLR	THE1A-int	7	0.028284	1	0.451
ARID1A	LTR	ERV1	MER48	7	0.028386	1	2.453
ARID1A	LTR	ERV1	MER52C	2	0.028675	1	0.249
ARID1A	LTR	ERVL	ERV3-16A3_I-int	90	0.028675	1	0.792
TFAP2C	LTR	ERV1	MER65D	4	0.028703	1	3.528
TFAP2C	LTR	ERVK	MER9a2	4	0.028794	1	3.532
GATA2	LTR	ERVL	LTR47B4	1	0.028829	1	3.835
TFAP2A	LTR	ERV1	MER34C	3	0.029285	1	4.596
MSX2	LTR	ERV1	MER92D	6	0.029661	1	2.644
SMARCA4	LTR	ERVK	LTR3B	4	0.029805	1	3.565
TFAP2A	LTR	ERV1	LTR24B	5	0.02989	1	2.949
TFAP2C	LTR	ERVL	MER76	6	0.029943	1	2.618
TFAP2C	LTR	ERV1	HERV3-int	6	0.029972	1	2.632
SMARCA4	LTR	Gypsy	MamGypLTR2c	6	0.029978	1	0.424
GATA3	LTR	ERV1	LTR26B	5	0.029994	1	2.979
TFAP2C	LTR	ERVL	MER74C	3	0.030244	1	4.531
TFAP2C	LTR	ERVK	HERVK-int	7	0.030425	1	2.41
SMARCA4	LTR	ERV1	LOR1a	5	0.030666	1	0.397
TFAP2C	LTR	ERV1	ERV24_Prim-int	5	0.0308	1	2.925
SMARCA4	LTR	ERV1	LTR10B1	6	0.030805	1	2.632
GATA3	LTR	EUTREP16	EUTREP16	8	0.030871	1	2.236
TFAP2A	LTR	Gypsy	MamGypLTR4	6	0.030914	1	2.598
SMARCA4	LTR	ERVL-MaLR	MLT1H-int	5	0.030956	1	0.395
GATA3	LTR	ERVL	LTR41B	4	0.031116	1	0.369
ARID1A	LTR	ERVK	LTR22	4	0.031153	1	3.52
GATA3	LTR	ERVL	MLT2B3	61	0.031491	1	1.327
TFAP2C	LTR	ERVL-MaLR	MLT1O-int	1	0.031671	1	33.853
TFAP2C	LTR	ERVL-MaLR	MLT1M	10	0.031714	1	2.119
TFAP2C	LTR	ERVL	LTR86B2	3	0.031773	1	4.437
TFAP2A	LTR	ERVL	LTR75	4	0.031791	1	3.422
GATA2	LTR	ERV1	LTR56	6	0.03205	1	2.573
MSX2	LTR	ERVL	LTR40c	13	0.032151	1	1.893
SMARCA4	LTR	ERV1	MER34A1	19	0.032346	1	1.722
ARID1A	LTR	ERV1	MER4B-int	36	0.032781	1	1.458
ARID1A	LTR	ERV1	LTR27B	6	0.03322	1	2.587
ARID1A	LTR	ERV1	MER34	28	0.033262	1	1.533
GATA2	LTR	ERVL	HERV16-int	1	0.033622	1	0.176
SMARCA4	LTR?	MamRep605	MamRep605	33	0.033676	1	0.691
SMARCA4	LTR	ERV1	LTR27B	6	0.03394	1	2.573
MSX2	LTR	ERV1	MER34D	7	0.033983	1	2.35
TFAP2C	LTR	ERVL-MaLR	MLT1L	38	0.034006	1	1.393
SMARCA4	LTR	ERVL-MaLR	MSTD-int	23	0.034033	1	1.587
MSX2	LTR	ERV1	LTR65	10	0.034289	1	2.074
SMARCA4	LTR	ERVL	MER68	13	0.034539	1	0.563
MSX2	LTR	ERVL-MaLR	MLT1H	88	0.034622	1	0.796
SMARCA4	LTR	ERV1	MER50C	4	0.034803	1	3.385
TFAP2A	LTR	ERV1?	EUTREP15	3	0.03499	1	4.28
ARID1A	LTR	ERVL-MaLR	MLT1C2-int	13	0.035183	1	1.854
ARID1A	LTR	ERV1	LTR68	10	0.035421	1	2.058
SMARCA4	LTR	ERVL-MaLR	MLT1B-int	15	0.035441	1	1.785
TFAP2A	LTR	ERVL	MER70A	6	0.035735	1	2.51
ARID1A	LTR	ERVL	LTR108a_Mam	3	0.035761	1	2.48
GATA3	LTR	ERV1	LTR06	3	0.035797	1	2.474
GATA2	LTR	Gypsy?	LTR88c	5	0.03583	1	2.796
GATA2	LTR	ERV1	MER92C	2	0.035901	1	6.848
GATA2	LTR	ERV1	MER57-int	1	0.036076	1	0.172
GATA3	LTR	ERV1	MER92A	5	0.036268	1	2.82
TFAP2C	LTR	ERV1	HERV1_LTRb	1	0.03628	1	30.013
TFAP2A	LTR	ERV1	LTR24	4	0.036303	1	3.276
TFAP2C	LTR	ERVK	MER9a1	4	0.036333	1	3.274
TFAP2A	LTR	ERV1	LTR37-int	1	0.036453	1	0.169
SMARCA4	LTR	ERV1	LTR15	8	0.0366	1	2.17
SMARCA4	LTR	ERVL-MaLR	MLT1F	47	0.036608	1	0.735
TFAP2C	LTR	ERV1	LTR24B	4	0.036735	1	3.257
TFAP2C	LTR	ERVL	LTR47B3	2	0.036823	1	6.761
SMARCA4	LTR	ERV1	LTR25	7	0.036958	1	2.314
ARID1A	LTR	ERVL	HERVL74-int	1	0.037305	1	0.161
TFAP2C	LTR	ERVL	LTR86A2	3	0.037501	1	4.15
TFAP2A	LTR	ERVL	HERVL18-int	0	0.037667	1	0
ARID1A	LTR	Gypsy	LTR81B	24	0.037721	1	1.579
TFAP2C	LTR	ERV1	MER52D	0	0.037755	1	0
TFAP2C	LTR	Gypsy?	LTR88a	5	0.03783	1	2.755
GATA3	LTR	ERVL	MER68C	5	0.037911	1	2.783
TFAP2C	LTR	ERVL	MER68-int	4	0.037921	1	3.226
TFAP2A	LTR	ERVL-MaLR	MLT1D	58	0.037977	1	0.762
GATA2	LTR	ERVL	ERV3-16A3_LTR	6	0.038019	1	2.466
GATA2	LTR	Gypsy	LTR104_Mam	0	0.038159	1	0
TFAP2A	LTR	ERV1	MER101-int	1	0.038202	1	0.162
GATA3	LTR	ERVL	HERVL40-int	29	0.038205	1	1.505
GATA2	LTR	ERV1	MER67B	4	0.03838	1	3.21
ARID1A	LTR	ERV1	MER87	5	0.038518	1	2.061
TFAP2C	LTR	ERV1	MER65A	0	0.038525	1	0
MSX2	LTR	ERV1	LTR78	69	0.038539	1	1.295
SMARCA4	LTR	ERVL	MLT2D	45	0.038672	1	0.734
TFAP2A	LTR	ERVL	LTR52	0	0.038759	1	0
GATA3	LTR	ERV1	MER90a	24	0.039138	1	1.561
SMARCA4	LTR	ERV1	MER51B	17	0.039566	1	1.68
TFAP2C	LTR	ERV1	LTR76	2	0.039723	1	2.697
TFAP2C	LTR	ERV1?	LTR103b_Mam	4	0.039979	1	3.164
ARID1A	LTR	ERV1	MER89	29	0.04021	1	1.485
ARID1A	LTR	LTR90A	LTR90A	10	0.040217	1	1.989
TFAP2C	LTR	ERVL-MaLR	MLT1D	39	0.040332	1	0.72
MSX2	LTR	ERVL-MaLR	MLT1F2-int	0	0.040441	1	0
TFAP2A	LTR	ERVL	MER70B	5	0.040576	1	2.707
TFAP2A	LTR	ERVL	MLT2B1	9	0.04082	1	0.51
ARID1A	LTR	ERV1	MER34-int	12	0.04092	1	1.91
GATA2	LTR	ERVL	MER68	0	0.040995	1	0
GATA2	LTR	ERVL-MaLR	MSTC	2	0.041086	1	0.27
MSX2	LTR	ERV1	LTR2C	7	0.041496	1	2.244
MSX2	LTR	ERV1	MER50B	3	0.041626	1	0.332
GATA3	LTR	ERVL	MER74B	20	0.041651	1	1.646
GATA2	LTR	ERV1	LTR26E	2	0.04166	1	6.308
ARID1A	LTR	ERVL	ERVL-E-int	118	0.041912	1	0.827
SMARCA4	LTR	ERV1	MER34-int	12	0.041916	1	1.894
TFAP2C	LTR	ERVL-MaLR	THE1B-int	21	0.042081	1	0.644
TFAP2C	LTR	ERVK	LTR22	2	0.042106	1	6.299
GATA3	LTR	ERV1	LTR1C1	4	0.042159	1	3.185
TFAP2A	LTR	EUTREP8	EUTREP8	3	0.042379	1	3.951
TFAP2C	LTR	ERV1	HERV30-int	3	0.042569	1	4.017
SMARCA4	LTR	ERVL-MaLR	MLT1M	41	0.042624	1	1.371
MSX2	LTR	ERVL	HERVL32-int	5	0.042805	1	2.701
SMARCA4	LTR	ERVL	LTR105_Mam	3	0.042806	1	0.324
MSX2	LTR	ERV1	MER101-int	8	0.043088	1	0.494
TFAP2C	LTR	Gypsy	MamGypLTR3a	7	0.043113	1	2.209
TFAP2A	LTR	ERVL	LTR82A	8	0.043155	1	1.898
GATA3	LTR	ERVL	MLT2F	35	0.043213	1	1.416
ARID1A	LTR	ERVL	LTR50	24	0.043342	1	0.665
GATA2	LTR	ERVL-MaLR	MSTA1	4	0.043391	1	3.081
TFAP2A	LTR	ERVL	HERV16-int	3	0.043401	1	0.328
MSX2	LTR	ERVL	LTR40b	20	0.043618	1	1.618
GATA2	LTR	ERV1	HUERS-P3b-int	6	0.043878	1	2.385
TFAP2A	LTR	ERV1	LTR58	2	0.043933	1	6.162
ARID1A	LTR	ERV1	MER34A	30	0.044164	1	1.471
TFAP2A	LTR	ERVL-MaLR	MLT1O-int	1	0.0449	1	23.703
GATA3	LTR	ERVL-MaLR	MLT1I	95	0.044972	1	0.812
TFAP2A	LTR	ERVK	HERVK14-int	6	0.044981	1	2.374
ARID1A	LTR	ERV1	MER34A1	18	0.045042	1	1.66
TFAP2C	LTR	ERVL-MaLR	MLT1E2	20	0.045324	1	1.6
TFAP2C	LTR	Gypsy	LTR104_Mam	9	0.045387	1	2.092
TFAP2C	LTR	ERVL	MER68B	3	0.045446	1	2.272
TFAP2C	LTR	ERV1	MER34B	5	0.045487	1	2.616
ARID1A	LTR	ERVL-MaLR	MLT1D-int	16	0.045624	1	1.715
GATA2	LTR	ERVL	LTR33	30	0.045861	1	1.459
ARID1A	LTR	ERVL	MER70B	12	0.046382	1	1.838
GATA3	LTR	LTR91A	LTR91A	36	0.046411	1	1.409
GATA3	LTR	ERVL-MaLR	MSTD-int	25	0.046463	1	1.517
MSX2	LTR	ERVL	LTR50	18	0.046602	1	0.634
MSX2	LTR	ERVL-MaLR	MSTD-int	20	0.046661	1	1.588
TFAP2A	LTR	ERV1	HERV1_LTRb	1	0.04667	1	23.477
MSX2	LTR	ERVL	LTR16E2	36	0.046686	1	1.407
MSX2	LTR	ERV1	HERV1_LTRe	2	0.046975	1	6.116
GATA2	LTR	ERVL?	LTR89B	4	0.047214	1	2.992
GATA2	LTR	Gypsy	MamGypsy2-I	10	0.047561	1	1.902
SMARCA4	LTR	LTR91	LTR91	12	0.047567	1	0.563
ARID1A	LTR	ERVL-MaLR	MLT1C2	257	0.047775	1	1.136
GATA3	LTR	ERV1	LTR49-int	50	0.047798	1	1.337
MSX2	LTR	ERVL	MER21C	88	0.047917	1	1.246
GATA3	LTR	ERV1	MER67A	10	0.047981	1	1.906
TFAP2A	LTR	ERV1	LTR37A	12	0.048017	1	1.816
TFAP2C	LTR	ERV1	MER65C	5	0.048241	1	2.572
MSX2	LTR	Gypsy	MamGypLTR1a	18	0.048249	1	1.626
TFAP2A	LTR	ERVL	LTR16D1	3	0.048279	1	3.752
GATA3	LTR	Gypsy	LTR81C	14	0.048342	1	1.747
MSX2	LTR	ERV1	MER4D0	10	0.048683	1	1.901
TFAP2C	LTR	ERV1	LTR29	5	0.048685	1	2.565
GATA2	LTR	ERVL	MER68C	1	0.048943	1	2.854
GATA3	LTR	ERVK	LTR3B_	7	0.048992	1	2.162
ARID1A	LTR	ERVL-MaLR	MLT1E	6	0.049117	1	0.46
GATA3	LTR	ERV1	LTR27	1	0.04944	1	0.184
GATA3	LTR	ERV1	MER87B	6	0.049588	1	2.328
TFAP2C	LTR	ERV1	HERVIP10FH-int	6	0.049772	1	2.312
ARID1A	LTR	ERVL-MaLR	MLT1F1	58	0.04994	1	1.302
ARID1A	LTR	Gypsy	MamGypLTR1d	16	0.050479	1	1.664
SMARCA4	LTR	ERVL	MER54B	12	0.050479	1	1.798
MSX2	LTR	ERV1	LTR76	6	0.050489	1	2.318
TFAP2A	LTR	ERV1	LTR6B	3	0.050637	1	3.689
ARID1A	LTR	ERVL	LTR57-int	1	0.050688	1	0.176
SMARCA4	LTR	ERVL-MaLR	MSTB-int	11	0.050792	1	0.557
SMARCA4	LTR	ERVL	LTR57-int	1	0.050885	1	0.175
TFAP2C	LTR	ERV1	MER51B	5	0.050953	1	2.531
GATA2	LTR	ERVL	LTR40b	6	0.050983	1	2.29
SMARCA4	LTR	ERVL-MaLR	MLT1J	182	0.051025	1	0.864
TFAP2A	LTR	ERV1	MER4-int	9	0.051107	1	0.522
GATA3	LTR	ERVL	LTR69	5	0.051147	1	2.559
MSX2	LTR	Gypsy?	LTR88c	16	0.051387	1	1.656
TFAP2A	LTR	ERV1	MER65A	1	0.051542	1	0.18
GATA3	LTR	ERVL	MLT2A2	42	0.051677	1	0.739
TFAP2C	LTR	ERVL	LTR75	3	0.051862	1	3.634
GATA3	LTR	ERVL	MER54A	5	0.051878	1	0.433
SMARCA4	LTR	ERVL	LTR66	1	0.052277	1	0.173
TFAP2A	LTR	ERV1	MER31-int	1	0.052541	1	0.176
TFAP2A	LTR	ERV1	LTR64	4	0.052576	1	2.893
TFAP2C	LTR	ERV1	MER83B	2	0.052616	1	5.518
ARID1A	LTR	ERV1	LTR54	23	0.053013	1	1.513
GATA2	LTR	ERV1	HUERS-P1-int	6	0.053104	1	2.271
MSX2	LTR	ERVL	LTR52	5	0.053258	1	0.426
MSX2	LTR	ERV1	MER34C	5	0.053855	1	2.51
MSX2	LTR	ERVL-MaLR	MLT1C2-int	11	0.054478	1	1.91
MSX2	LTR	ERV1	LTR1F1	0	0.05461	1	0
ARID1A	LTR	ERV1	LTR10C	14	0.054701	1	1.693
TFAP2A	LTR?	MER129	MER129	2	0.054829	1	5.399
ARID1A	LTR	ERVK	LTR13	4	0.054881	1	0.386
ARID1A	LTR	ERV1	HERVIP10B3-int	11	0.05491	1	1.902
GATA3	LTR	ERVL	LTR86C	7	0.05523	1	2.046
TFAP2A	LTR	ERVL-MaLR	MLT1L-int	1	0.055372	1	2.664
ARID1A	LTR	ERV1?	EUTREP15	6	0.055482	1	2.261
TFAP2C	LTR	ERV1	LTR37A	9	0.055588	1	1.954
ARID1A	LTR	ERVL-MaLR	MLT1E2-int	5	0.055742	1	2.5
MSX2	LTR	ERVL	MER73	0	0.055762	1	0
SMARCA4	LTR	ERV1	LTR49	32	0.055796	1	1.42
TFAP2C	LTR	ERVL	MER54B	4	0.055846	1	2.832
MSX2	LTR	ERVL	MLT2B3	28	0.055902	1	0.695
TFAP2A	LTR	ERVL	LTR41B	0	0.055939	1	0
TFAP2C	LTR	ERV1	MER92-int	0	0.056009	1	0
TFAP2A	LTR	ERV1	MER57A-int	4	0.056011	1	0.394
MSX2	LTR	ERV1	LTR54	19	0.056105	1	1.597
GATA2	LTR	ERV1	MER66B	0	0.056124	1	0
TFAP2A	LTR	ERV1	LTR12D	0	0.056657	1	0
MSX2	LTR	ERVL-MaLR	MLT1K-int	5	0.05674	1	2.471
TFAP2C	LTR	ERV1	LTR24	3	0.057104	1	3.489
TFAP2C	LTR	ERVL	LTR16D	6	0.0574	1	2.22
SMARCA4	LTR	ERV1	MER110A	3	0.057464	1	0.34
SMARCA4	LTR	ERVK	LTR3B_	0	0.057905	1	0
TFAP2A	LTR	ERV1	MER83B-int	4	0.058217	1	2.8
MSX2	LTR	ERV1	Harlequin-int	22	0.058417	1	1.559
SMARCA4	LTR	ERVL	LTR40c	15	0.058593	1	1.712
SMARCA4	LTR	ERV1	LTR19C	5	0.058728	1	2.461
MSX2	LTR	ERV1	ERV24_Prim-int	11	0.058756	1	1.85
ARID1A	LTR	ERVL-MaLR	MLT1J1-int	13	0.058785	1	1.782
MSX2	LTR	ERVL-MaLR	MLT1H2	35	0.058882	1	0.728
ARID1A	LTR	ERVL	LTR33B	12	0.058902	1	0.574
TFAP2A	LTR	ERVL-MaLR	MLT1H-int	0	0.058925	1	0
TFAP2C	LTR	ERV1	LTR12	0	0.059266	1	0
GATA2	LTR	ERVL-MaLR	MLT1A	12	0.059503	1	0.582
GATA3	LTR	ERV1	MER51A	7	0.059549	1	0.487
GATA2	LTR	ERVL	LTR69	2	0.059606	1	5.142
MSX2	LTR	ERVL-MaLR	MST-int	6	0.059722	1	2.215
SMARCA4	LTR	ERV1	LTR7Y	8	0.060366	1	2.147
GATA3	LTR	Gypsy	MamGypLTR1c	19	0.060586	1	1.558
GATA3	LTR	Gypsy	LTR81A	15	0.060984	1	1.683
ARID1A	LTR	ERVL	LTR47B4	4	0.060988	1	2.787
ARID1A	LTR	ERV1	LTR31	8	0.06106	1	2.132
GATA3	LTR	ERVK	HERVKC4-int	4	0.061917	1	2.823
GATA2	LTR	ERVL-MaLR	MLT1N2	5	0.061938	1	0.471
TFAP2C	LTR	ERV1	HERV9NC-int	8	0.062021	1	2.114
GATA2	LTR	ERVL	HERVL40-int	8	0.06267	1	2.101
TFAP2A	LTR	ERVK	LTR22C	1	0.062893	1	16.637
SMARCA4	LTR	ERV1	HUERS-P3-int	6	0.063051	1	0.466
ARID1A	LTR	ERVL	LTR16	55	0.063179	1	1.297
SMARCA4	LTR	ERVL	LTR47B4	4	0.063468	1	2.749
TFAP2C	LTR	ERVL-MaLR	MSTA1	4	0.063862	1	2.701
GATA3	LTR	Gypsy	MamGypLTR3a	22	0.06388	1	1.511
ARID1A	LTR	ERV1	LTR60B	8	0.063892	1	2.083
SMARCA4	LTR	ERV1	LTR10B2	4	0.063949	1	2.741
GATA3	LTR	ERVL	LTR52	6	0.064085	1	0.471
TFAP2C	LTR	ERV1	LTR26C	3	0.064122	1	3.322
SMARCA4	LTR	ERVL	LTR86B2	8	0.064418	1	2.074
GATA2	LTR	Gypsy	MamGypLTR3a	6	0.064514	1	2.152
ARID1A	LTR	ERVL	LTR69	5	0.064701	1	2.386
TFAP2C	LTR	ERVL	MLT2B1	6	0.064717	1	0.479
TFAP2A	LTR	ERV1	HUERS-P3-int	9	0.064847	1	1.875
GATA2	LTR	ERVL	MER70A	4	0.064973	1	2.686
GATA2	LTR	ERV1	HERVE_a-int	4	0.064989	1	2.706
TFAP2A	LTR	ERVL-MaLR	MLT1A-int	5	0.065322	1	2.356
GATA2	LTR	ERVL	MLT2F	9	0.065391	1	1.867
GATA2	LTR	ERV1	LOR1b	6	0.065813	1	2.141
MSX2	LTR	Gypsy	LTR104_Mam	28	0.06625	1	1.448
MSX2	LTR	ERV1	HERVE_a-int	9	0.066734	1	1.879
TFAP2A	LTR	Gypsy	LTR104_Mam	11	0.06675	1	1.77
SMARCA4	LTR	ERVL	LTR69	5	0.067099	1	2.36
TFAP2A	LTR	ERV1	LTR10B2	2	0.067133	1	4.82
GATA2	LTR	ERVL	MLT2C2	6	0.067689	1	2.124
GATA3	LTR	ERVL	ERVL-int	8	0.067729	1	0.526
GATA2	LTR	ERV1	HERVIP10FH-int	5	0.067736	1	2.332
SMARCA4	LTR	ERV1	MER89-int	5	0.068265	1	0.442
GATA2	LTR	ERV1	MER57C1	1	0.068318	1	2.358
GATA2	LTR	ERVL	LTR47B2	2	0.068684	1	4.732
ARID1A	LTR	ERVL	LTR62	9	0.069052	1	1.85
GATA3	LTR	ERVL	MLT2B2	38	0.069069	1	1.367
ARID1A	LTR	ERVL-MaLR	MLT1H1	39	0.069347	1	0.743
GATA2	LTR	ERVL-MaLR	MLT1O	15	0.069463	1	1.611
GATA3	LTR	ERV1	LTR17	23	0.069555	1	1.506
SMARCA4	LTR	ERV1	MER92A	5	0.069573	1	2.331
ARID1A	LTR	ERV1	LTR2752	1	0.070096	1	0.19
ARID1A	LTR	ERVL-MaLR	MLT1F2-int	1	0.070202	1	0.195
ARID1A	LTR	ERVL-MaLR	MSTB1-int	8	0.070358	1	2.001
SMARCA4	LTR	ERVL-MaLR	MLT1F2-int	1	0.070392	1	0.194
MSX2	LTR	ERVL	HERVL74-int	1	0.070433	1	0.197
SMARCA4	LTR	ERV1	LTR65	11	0.070808	1	1.744
TFAP2A	LTR	ERV1	LTR73	3	0.070809	1	3.192
GATA2	LTR	ERVL	LTR79	13	0.070827	1	1.667
ARID1A	LTR	ERV1	LTR28B	1	0.070863	1	0.19
SMARCA4	LTR	Gypsy?	LTR88c	20	0.07099	1	1.516
MSX2	LTR	ERV1	HERVFH19-int	5	0.071031	1	2.335
GATA2	LTR	ERV1?	EUTREP15	2	0.071181	1	4.628
TFAP2A	LTR	ERV1	LTR25	3	0.071224	1	3.186
MSX2	LTR	ERVL	LTR53-int	1	0.07155	1	0.191
SMARCA4	LTR	ERVL	LTR40A1	13	0.071874	1	1.663
ARID1A	LTR	ERVL	MLT2B3	37	0.073517	1	0.739
SMARCA4	LTR	ERV1	LTR26D	6	0.074444	1	2.09
SMARCA4	LTR	ERV1	MER66-int	7	0.074469	1	0.505
MSX2	LTR	ERVK	LTR3B_	6	0.074499	1	2.084
SMARCA4	LTR	ERVL-MaLR	MLT1F-int	3	0.074929	1	0.363
GATA3	LTR	ERV1	LTR1B	2	0.075022	1	0.294
MSX2	LTR	ERVL-MaLR	MLT1F-int	2	0.075122	1	0.304
SMARCA4	LTR	ERV1	LTR1A1	2	0.075319	1	0.294
ARID1A	LTR	ERV1	MER110-int	2	0.075394	1	0.296
ARID1A	LTR	ERV1	MER41E	10	0.075562	1	1.876
MSX2	LTR	ERVL	LTR108a_Mam	3	0.075714	1	3.134
SMARCA4	LTR	ERVL	MER74B	7	0.075956	1	0.501
TFAP2A	LTR	ERVL-MaLR	MLT1E1	8	0.076269	1	1.931
TFAP2A	LTR	ERVL	LTR86B2	3	0.076304	1	3.084
TFAP2C	LTR	ERV1	MER50-int	6	0.076459	1	2.06
TFAP2A	LTR	ERVL	MER68	2	0.076798	1	0.3
MSX2	LTR	ERV1	HERVE-int	14	0.07709	1	1.679
TFAP2C	LTR	ERV1	LTR37-int	1	0.077307	1	0.239
TFAP2C	LTR	ERV1	LTR64	3	0.077555	1	3.059
GATA2	LTR	ERVL-MaLR	MLT1M	8	0.077701	1	1.917
TFAP2C	LTR	ERV1	MER34C	2	0.07779	1	4.394
GATA2	LTR	ERV1	MER92D	2	0.077855	1	4.388
GATA3	LTR	ERV1	MER65-int	11	0.078342	1	0.589
TFAP2A	LTR	ERV1	HUERS-P1-int	8	0.078766	1	1.912
GATA2	LTR	ERVK	HERVK14-int	4	0.078768	1	2.512
GATA2	LTR?	MamRep605b	MamRep605b	8	0.07902	1	1.905
GATA2	LTR	Gypsy?	LTR88b	6	0.079538	1	2.033
TFAP2C	LTR	Gypsy	MamGypLTR4	4	0.079545	1	2.498
TFAP2C	LTR	ERVL-MaLR	MLT1E3	10	0.079965	1	1.822
GATA3	LTR	LTR91	LTR91	24	0.080225	1	1.468
TFAP2C	LTR	ERVL	MLT2B4	6	0.080872	1	0.503
ARID1A	LTR	ERVL	LTR53B	0	0.08094	1	0
SMARCA4	LTR	ERVL	LTR53B	0	0.081012	1	0
ARID1A	LTR	ERVL-MaLR	MLT1I-int	6	0.081063	1	0.491
ARID1A	LTR	ERV1	MER92D	6	0.08123	1	2.037
SMARCA4	LTR	ERV1	MER50-int	16	0.081256	1	1.57
SMARCA4	LTR	ERVK	MER9a3	14	0.081579	1	1.641
GATA2	LTR	ERV1	LTR65	2	0.081958	1	1.984
TFAP2A	LTR	ERV1	MER34A1	6	0.081974	1	2.019
ARID1A	LTR	ERV1	LOR1a	6	0.082147	1	0.483
MSX2	LTR	LTR107_Mam	LTR107_Mam	8	0.082584	1	1.882
TFAP2C	LTR	ERVL	LTR40b	6	0.082872	1	2.003
GATA3	LTR	ERV1	LTR54B	16	0.082921	1	1.56
GATA2	LTR	ERV1	LTR12	0	0.08296	1	0
SMARCA4	LTR	ERVL-MaLR	THE1-int	0	0.083006	1	0
GATA3	LTR	ERVL-MaLR	THE1-int	0	0.083147	1	0
GATA2	LTR	Gypsy	LTR81AB	2	0.083516	1	4.207
TFAP2C	LTR	ERVL	LTR82B	6	0.083613	1	1.93
TFAP2A	LTR	ERV1	LTR4	2	0.083797	1	4.238
TFAP2A	LTR	ERV1	LTR65	4	0.083813	1	2.455
ARID1A	LTR	ERVL	LTR16A1	48	0.08392	1	1.286
GATA2	LTR	ERV1	LTR35B	2	0.083989	1	4.2
GATA2	LTR	ERV1	LTR1A2	0	0.084254	1	0
SMARCA4	LTR	ERV1	LTR10E	8	0.084349	1	1.874
GATA3	LTR	ERVL	LTR53	12	0.084533	1	1.697
MSX2	LTR	ERV1	LTR26D	5	0.084672	1	2.188
MSX2	LTR	ERV1	MER34	21	0.084718	1	1.462
TFAP2C	LTR	ERV1	HERVP71A-int	4	0.0851	1	2.454
TFAP2C	LTR	ERV1	MER57C1	1	0.085182	1	2.072
SMARCA4	LTR	ERV1	MER61-int	34	0.085695	1	1.359
GATA2	LTR	ERVL	LTR16	12	0.085836	1	1.687
GATA2	LTR	ERV1	MER52D	0	0.086237	1	0
MSX2	LTR	ERVK	MER11C	10	0.086374	1	0.582
GATA3	LTR	ERVL	LTR33A_	27	0.086511	1	1.396
TFAP2C	LTR	ERV1	MER57A1	0	0.086612	1	0
GATA3	LTR	ERV1	MER51D	4	0.086721	1	2.443
ARID1A	LTR	ERV1	ERV24_Prim-int	12	0.086741	1	1.68
GATA2	LTR	ERVK	LTR22A	2	0.086835	1	4.123
GATA2	LTR	ERV1	LTR25-int	5	0.08732	1	2.156
GATA2	LTR	Gypsy	MamGypLTR1c	5	0.087554	1	2.148
TFAP2C	LTR	ERV1	HERVFH21-int	3	0.087716	1	2.919
MSX2	LTR	ERVL	MLT2B1	38	0.088041	1	0.753
SMARCA4	LTR	ERV1	MER51A	22	0.088147	1	1.476
MSX2	LTR	ERVL-MaLR	MLT1G3	41	0.088338	1	1.307
GATA3	LTR	ERV1	ERV24B_Prim-int	12	0.088404	1	1.668
ARID1A	LTR	ERVL	LTR82A	22	0.088931	1	1.47
GATA3	LTR	ERV1	MER83B	4	0.089037	1	2.42
MSX2	LTR	ERVL-MaLR	MLT1E2-int	4	0.089583	1	2.42
SMARCA4	LTR	ERV1	MER4-int	39	0.089967	1	0.758
ARID1A	LTR	Gypsy?	LTR88c	19	0.090372	1	1.488
TFAP2A	LTR	ERV1	LTR71B	3	0.090732	1	2.863
TFAP2C	LTR	ERVL	MLT2D	5	0.090901	1	0.461
GATA3	LTR	ERVL	LTR16A	63	0.090957	1	1.235
TFAP2A	LTR	ERVL	LTR33C	7	0.09112	1	2.06
GATA2	LTR	ERVL-MaLR	MLT1J2-int	4	0.092252	1	2.369
ARID1A	LTR	ERVK	HERVK13-int	4	0.092409	1	2.425
GATA2	LTR	ERVL	LTR47B	1	0.092441	1	10.55
TFAP2C	LTR	ERV1	LTR23-int	2	0.092486	1	3.967
ARID1A	LTR	ERVL-MaLR	MSTB2	15	0.093188	1	0.644
SMARCA4	LTR	ERVL-MaLR	MLT1J1	52	0.09328	1	0.786
SMARCA4	LTR	ERV1	LTR59	4	0.094152	1	2.379
GATA2	LTR	ERV1	MER51B	3	0.094255	1	1.759
GATA2	LTR	Gypsy	LTR81A	4	0.095043	1	2.341
GATA2	LTR	ERVL-MaLR	MLT1J	23	0.095146	1	0.705
TFAP2A	LTR	ERV1	LTR26E	2	0.095747	1	3.902
ARID1A	LTR	LTR91	LTR91	13	0.095788	1	0.628
TFAP2C	LTR	ERVL-MaLR	MSTB1	7	0.096092	1	0.534
SMARCA4	LTR	ERVL	LTR16E2	43	0.096292	1	1.297
TFAP2C	LTR	ERV1	MER87	1	0.096394	1	1.925
GATA2	LTR	ERV1	MER90	4	0.096461	1	2.329
TFAP2C	LTR	EUTREP8	EUTREP8	2	0.097457	1	3.837
TFAP2A	LTR	ERV1	LTR7Y	3	0.097482	1	2.77
GATA2	LTR	ERV1	MER48	2	0.09777	1	3.837
SMARCA4	LTR	ERV1	HERV9NC-int	15	0.09787	1	1.58
MSX2	LTR	ERV1	HERVS71-int	1	0.098078	1	0.203
GATA3	LTR	ERV1?	LTR103b_Mam	10	0.09909	1	1.682
ARID1A	LTR	ERV1	LTR1B0	4	0.099152	1	2.343
[truncated: 2,124 more rows]

## Sheet: Description of Table S5
Table S5 Enrichment of different ERV families in the peaks of GATA2/3, MSX2 and related TFs This table includes the ERV enrichment result for the peaks of GATA2, GATA3, MSX2 and related TFs (ie. TFAP2A and TFAP2C for GATA2/3, and ARID1A and SMARCA for MSX2). Results for all the ERV families, including the non-significant ones, are included in the table. The data is ranked by p-value.
